# Supplementary material for: Long-term effect of smartphone-delivered Interval Walking Training on physical activity in patients with type 2 diabetes: protocol for a parallel group single-blinded randomised controlled trial
Source: PubMed Central journal article supplement — BMJ Open. 2017 Apr 5;7(4):e014036. doi: 10.1136/bmjopen-2016-014036 (PMC5558820; doi:10.1136/bmjopen-2016-014036), 2017-04-05
Supplement: bmjopen-2016-014036.draft_revisions.pdf [file bmjopen-2016-014036.draft_revisions.pdf]

# BMJ Open

## The long-term effect of smartphone-delivered Interval Walking Training on physical activity in patients with type 2 diabetes: protocol for a parallel group single-blinded randomized controlled trial

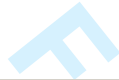

|                                 |                                                                                                                                                                                                                                                                                                                                                                                                                                                                                                                                                                                                                                                                                                                                                                                                                                                                                                                                                                                                                                                                                                                                                                                                                                                                                                                               |
|---------------------------------|-------------------------------------------------------------------------------------------------------------------------------------------------------------------------------------------------------------------------------------------------------------------------------------------------------------------------------------------------------------------------------------------------------------------------------------------------------------------------------------------------------------------------------------------------------------------------------------------------------------------------------------------------------------------------------------------------------------------------------------------------------------------------------------------------------------------------------------------------------------------------------------------------------------------------------------------------------------------------------------------------------------------------------------------------------------------------------------------------------------------------------------------------------------------------------------------------------------------------------------------------------------------------------------------------------------------------------|
| Journal:                        | <i>BMJ Open</i>                                                                                                                                                                                                                                                                                                                                                                                                                                                                                                                                                                                                                                                                                                                                                                                                                                                                                                                                                                                                                                                                                                                                                                                                                                                                                                               |
| Manuscript ID                   | bmjopen-2016-014036                                                                                                                                                                                                                                                                                                                                                                                                                                                                                                                                                                                                                                                                                                                                                                                                                                                                                                                                                                                                                                                                                                                                                                                                                                                                                                           |
| Article Type:                   | Protocol                                                                                                                                                                                                                                                                                                                                                                                                                                                                                                                                                                                                                                                                                                                                                                                                                                                                                                                                                                                                                                                                                                                                                                                                                                                                                                                      |
| Date Submitted by the Author:   | 29-Aug-2016                                                                                                                                                                                                                                                                                                                                                                                                                                                                                                                                                                                                                                                                                                                                                                                                                                                                                                                                                                                                                                                                                                                                                                                                                                                                                                                   |
| Complete List of Authors:       | <p>Valentiner, Laura; University of Copenhagen, CopenRehab, Department of Public Health, Section of Social Medicine, Henrik Pontoppidans Vej 6; Copenhagen University Hospital, Center for Physical Activity Research, Blegdamsvej 9, DK-2100</p> <p>Ried-Larsen, Mathias; Copenhagen University Hospital, Center for Physical Activity Research</p> <p>Karstoft, Kristian; Copenhagen University Hospital, Center for Physical Activity Research; Rigshospitalet, University of Copenhagen, Brinkløv, Cecilie; Copenhagen University Hospital, Center for Physical Activity Research Blegdamsvej 9 Copenhagen, DK 2100</p> <p>Brøns, Charlotte; Copenhagen University Hospital, Center for Physical Activity Research</p> <p>Nielsen, Rasmus; Copenhagen University Hospital, Center for Physical Activity Research</p> <p>Christensen, Robin; Frederiksberg and Bispebjerg Hospital, Parker Institute</p> <p>Nielsen, Jens; Department of Endocrinology (Diabetes and Metabolism), Rigshospitalet, University of Copenhagen</p> <p>Vaag, Allan; Steno Diabetes Center,</p> <p>Pedersen, Bente; Copenhagen University Hospital, Center for Physical Activity Research</p> <p>Langberg, Henning; CopenRehab, Department of Public Health, Section of Social Medicine, Henrik Pontoppidans Vej 6, University of Copenhagen</p> |
| <b>Primary Subject Heading</b>: | Diabetes and endocrinology                                                                                                                                                                                                                                                                                                                                                                                                                                                                                                                                                                                                                                                                                                                                                                                                                                                                                                                                                                                                                                                                                                                                                                                                                                                                                                    |
| Secondary Subject Heading:      | Diabetes and endocrinology, Sports and exercise medicine, Rehabilitation medicine, Evidence based practice                                                                                                                                                                                                                                                                                                                                                                                                                                                                                                                                                                                                                                                                                                                                                                                                                                                                                                                                                                                                                                                                                                                                                                                                                    |
| Keywords:                       | Type 2 diabetes, Rehabilitation, Interval Walking Training, Physical Activity, Behaviour maintenance                                                                                                                                                                                                                                                                                                                                                                                                                                                                                                                                                                                                                                                                                                                                                                                                                                                                                                                                                                                                                                                                                                                                                                                                                          |
|                                 |                                                                                                                                                                                                                                                                                                                                                                                                                                                                                                                                                                                                                                                                                                                                                                                                                                                                                                                                                                                                                                                                                                                                                                                                                                                                                                                               |

SCHOLARONE™  
Manuscripts

**TITLE:**

The long-term effect of smartphone-delivered Interval Walking Training on physical activity in patients with type 2 diabetes: protocol for a parallel group single-blinded randomized controlled trial

**CORRESPONDING AUTHOR:**

Laura Staun Valentiner, Department of Public Health, Section of Social Medicine, CopenRehab, University of Copenhagen, Henrik Pontoppidans Vej 6, 2200 Copenhagen, Denmark

Phone: +45 51173649

Email: [lauravalentiner@gmail.com](mailto:lauravalentiner@gmail.com)

**RUNNING HEAD**

Effect of Interval Walking on Type 2 Diabetics

**BRIEF TITLE:**

The InterWalk Trial

**AUTHORS:**

Laura Staun Valentiner<sup>1,2</sup> ([lauravalentiner@gmail.com](mailto:lauravalentiner@gmail.com))

## Effect of Interval walking on type 2 diabetics

BMJ Open

Mathias Ried-Larsen<sup>2,3,4</sup> ([mathias.ried-larsen@regionh.dk](mailto:mathias.ried-larsen@regionh.dk))

Kristian Karstoft<sup>2,4</sup> ([kristian.karstoft@regionh.dk](mailto:kristian.karstoft@regionh.dk))

Cecilie Fau Brinkløv<sup>2,4</sup> ([cecilie.fau.brinkloev@regionh.dk](mailto:cecilie.fau.brinkloev@regionh.dk))

Charlotte Brøns<sup>2,7</sup> ([charlotte.broens@regionh.dk](mailto:charlotte.broens@regionh.dk))

Rasmus Oestergaard Nielsen<sup>1,2</sup> ([roen@ph.au.dk](mailto:roen@ph.au.dk))

Robin Christensen<sup>5</sup> ([robin.christensen@regionh.dk](mailto:robin.christensen@regionh.dk))

Jens Steen Nielsen<sup>6</sup> ([jsn@rsyd.dk](mailto:jsn@rsyd.dk))

Alan Arthur Vaag<sup>2,3,4</sup> ([allan.arthur.vaag@regionh.dk](mailto:allan.arthur.vaag@regionh.dk))

Bente Klarlund Pedersen<sup>2,4</sup> ([bente.klarlund.pedersen@regionh.dk](mailto:bente.klarlund.pedersen@regionh.dk))

Henning Langberg<sup>1,2</sup> ([langberg@sund.ku.dk](mailto:langberg@sund.ku.dk))

1. CopenRehab, Department of Public Health, Section of Social Medicine, Henrik Pontoppidans Vej 6, University of Copenhagen, 2200 Copenhagen, Denmark
2. Center for Physical Activity Research, Department of Infectious Diseases, Rigshospitalet, University of Copenhagen, Blegdamsvej 9, 2100 Copenhagen, Denmark
3. The Danish Diabetes Academy, Odense University Hospital, Sdr. Boulevard 29, Entrance 112, 3rd floor, 5000 Odense, Denmark
4. Centre of Inflammation and Metabolism, Department of Infectious Diseases, Rigshospitalet, University of Copenhagen, Blegdamsvej 9, 2100 Copenhagen, Denmark

5. Musculoskeletal Statistics Unit, The Parker Institute, Bispebjerg and Frederiksberg Hospital, The Capital Region of Denmark, Denmark
6. Department of Endocrinology, Odense University Hospital, Sdr. Boulevard 29, Entrance 112, 3rd floor, 5000 Odense, Denmark
7. Department of Endocrinology (Diabetes and Metabolism), Rigshospitalet, University of Copenhagen, Denmark

**TOTAL NUMBER OF WORDS:**

6509

**ABSTRACT:****Introduction**

Physical activity is a cornerstone in rehabilitation of Type 2 diabetes patients (T2D). Development of effective long-term and low cost strategies to keep these patients' physically active is needed. However, maintaining physical activity behaviour is difficult once formalised interventions end. One potentially effective strategy includes structured exercise training supported by mobile technology and remote feedback.

The aim is to investigate whether mobile health support using the InterWalk application for smartphones is effective in increasing the physical activity level in persons with T2D over time compared to standard care.

We investigate if a rehabilitation programme with interval walking training using the InterWalk app is superior to Danish municipality-based rehabilitation in increasing moderate-and-vigorous physical activity level in patients with T2D across 52 weeks. Secondary, we hypothesize that a motivational programme added from end of intervention to 52-weeks further increases level of physical activity in everyday life in patients with T2D.

**Methods and analysis**

The trial is a parallel-group, open-labelled, randomised controlled trial with 52-week follow-up including patients with T2D. The primary outcome is change in moderate-and-vigorous physical activity. The key secondary outcome includes motivation for physical

activity behaviour change. Exclusion criterion is medical contraindication to exercise. We include up to 246 patients and randomly allocate them into a control (standard group exercise) or an experimental group (8-12 weeks of interval walking training supported by the smartphone-based InterWalk application) in a 1:2 fashion. After intervention, the experimental group is randomly allocated into two follow-up conditions with unsupervised interval walking training with or without motivational support until 52-week follow-up. Data is analysed by the Intention-To-Treat principle.

#### **Ethics and Dissemination**

The local regional Research Ethics Committee in Denmark (H-1-2014-074) and the Danish Data Protection Agency (j.nr. 2014-54-0897) has approved the trial. Positive, negative or inconclusive results will be disseminated in scientific journals and conferences.

**Trial registration:** NCT02341690

**Keywords:** Type 2 diabetes, Rehabilitation, Interval walking Training, Physical activity, Behaviour maintenance

#### **STREGTHS:**

- The trial is the largest of its kind, and meets the criteria for high quality randomized controlled trials with central randomization, multi centre setup and use of valid and reliable measures.

## Effect of Interval walking on type 2 diabetics

BMJ Open

- The trial gives knowledge to the lacking evidence on pragmatic designed trials and secures directly implementable interventions in clinical practice
- The trial visualises the importance of individual motivation regarding behavioural change with physical activity when diagnosed with type 2 diabetes

**LIMITS:**

- We are aware that the design of the trial with a multi centre setup may cause variation in the testing situations were the performance can depend in the individual health professional. Accordingly, all results will be interpreted conservatively.

## INTRODUCTION

Physical activity (PA) is a cornerstone in the clinical care of patients with type 2 diabetes (T2D).[1] PA activity has beneficial effect on glycaemic control and other key metabolic risk factors [2,3], as well as improvements in quality of life.[4,5] Furthermore, supervised long-term PA interventions have proven effective in improving glycaemic control.[2,6] However, experimental evidence does not support the efficiency of advice about physical activity alone.[7] As the number of patients with T2D is estimated to rise to 500 million by 2030 worldwide [8,9] the implementation of structured, long-term and supervised exercise regimes constitutes a large societal challenge and is not feasible. Thus, novel strategies to increase physical activity among patients with T2D are needed.

Smartphones have been used as a tool to register exercise, diet, weight and plasma glucose levels, but the evidence for using a smartphone as an exercise device and a self-management tool in the diabetes care is lacking.[10] However, emerging evidence suggest that eHealth solutions using information and communication technologies [11] can educate and engage patients with T2D in long-term self-management.[12–14] Due to the large ingress and ownership of smartphones, a smartphone-supported approach could prove feasible in increasing physical activity among patients with T2D and accommodate the increasing prevalence of T2D.

Efficiency of interval walking training (IWT) in patients with T2D has been established.[15] In the study by Karstoft and co-workers, IWT was administered and



1  
2  
3  
4  
5  
6  
7  
8  
9 monitored using a small exercise computer (JD-mate). IWT induced significant improvements  
10 in physical fitness level, body composition and glycaemic control and in adherence of more  
11 than 85% over a 16 weeks period.[15] The potential benefits of implementing eHealth  
12 solutions in T2D management and the apparent health benefits of and adherence to IWT gave  
13 rise to the development of the InterWalk application (InterWalk app) to deliver IWT.[16]  
14  
15  
16  
17  
18

19  
20 There is a lack of knowledge about the integration of PA in the everyday life  
21 of the patient following rehabilitation interventions.[17] It is, however, known that  
22 successful behavioural change depends on an on-going maintenance of individual  
23 motivation regarding the behaviour and behavioural change itself.[18] Furthermore, time  
24 since onset of diagnosis, unhealthy behaviour and own beliefs about the cause of the  
25 problem, together with the number of previous attempts to change and support from  
26 partners, peers and health professionals are of relevance.[18] This underlines the need for  
27 new interventions with a direct focus on motivational support and self-control regarding  
28 sustaining a newly acquired behavioural change with PA. To better target and structure  
29 manageable interventions related to patients with T2D, understanding patients' individual  
30 priorities and values are crucial. In this regard, knowledge of individual motivation and self-  
31 efficacy to initiate behavioural changes becomes essential to understand.[18]  
32  
33  
34  
35  
36  
37  
38  
39  
40  
41  
42  
43  
44  
45

46 This paper presents a detailed protocol for the InterWalk Randomised  
47 Controlled Trial and is described in accordance with the SPIRIT guidelines (Standard  
48 Protocol Items: Recommendations for Interventional Trials).[19] Results from the trial will  
49  
50  
51  
52  
53  
54  
55  
56  
57  
58  
59  
60

1  
2  
3  
4  
5  
6  
7  
8 follow CONSORT guidelines (CONsolidated Standards Of Reporting Trials) for non-  
9 pharmacological interventions.[20]  
10  
11  
12

### 13 14 15 **Trial objective and hypothesis** 16

17 The objective of the trial is to investigate whether mobile support using the InterWalk  
18 application for smartphones is effective in increasing the physical activity level in persons  
19 with type 2 diabetes over time compared with a standard care rehabilitation program.  
20  
21  
22

23 We investigate the effectiveness of the implementation of interval walking training using the  
24 InterWalk application in the Danish municipality-based rehabilitation program and study  
25 whether the interval walking training is superior to standard care in increasing moderate-  
26 vigorous physical activity 52 after weeks. Furthermore, we expect that a motivational support  
27 program added from end of the intervention to 52-weeks, will increase the physical activity  
28 level in patients with type 2 diabetes and help maintaining a physically active everyday life  
29 long-term.  
30  
31  
32  
33  
34  
35  
36  
37  
38  
39  
40  
41

### 42 **METHODS AND ANALYSIS** 43

#### 44 ***Trial design and setting*** 45

46 The trial is a 52-week parallel-arm, open-labelled, randomised controlled superiority trial.  
47  
48 The participants are randomly allocated into two groups, 1) standard care or 2)  
49 experimental group with moderate-and-vigorous physical activity level, doing interval  
50  
51  
52  
53  
54  
55  
56  
57  
58  
59  
60

1  
2  
3  
4  
5  
6  
7  
8  
9 walking facilitated by the InterWalk app. After an 8-12-week intervention period, patients  
10 in the experimental group are allocated to do interval walking using the InterWalk app with  
11 or without motivational support provided by the health professionals (see Figure 1).  
12  
13

14  
15  
16  
17 [INSERT FIGURE 1 ABOUT HERE]  
18  
19

20  
21 The intervention is conducted at the health promotion centres in Danish  
22 municipalities and hospitals that consecutively are included as cooperation partners. The  
23 municipality of Copenhagen is the first collaborator in the trial. Patients are referred to  
24 rehabilitation by their general practitioner (GP). Trained health professionals (physical  
25 therapists, nurses and staff with a master's degree) working at the health promotion centres  
26 recruit the patients, deliver the interventions and conduct all testing. The overall  
27 organization of health care in Denmark is fully tax-financed with universal access to health  
28 care services. The Danish model is described in detail elsewhere [21,22] and chronic  
29 disease care (including T2D) management is in Denmark based in the Chronic Care  
30 Model.[23]  
31  
32  
33  
34  
35  
36  
37  
38  
39  
40  
41  
42

43 Briefly, all patients diagnosed T2D can be referred to rehabilitation at either  
44 an out-patient clinic, municipality or hospital level in Denmark by their GP. The  
45 municipality based rehabilitation primarily includes non-complicated patients (~80% of all  
46 patients) referred from GPs.[21] If complications or co-morbidities are present, patients are  
47 referred to treatment at a specialized clinic at a hospital. Patients with a non-complicated  
48  
49  
50  
51  
52  
53  
54  
55  
56  
57  
58  
59  
60

1  
2  
3  
4  
5  
6  
7  
8  
9 course of disease receive rehabilitation consisting of: 1) disease-specific patient education,  
10 2) diet counseling, 3) smoking cessation and 4) exercise. The composition of the individual  
11 rehabilitation program depends however on disease progression and on the rehabilitation  
12 offered in the municipality-based program or at the hospital. The general focus is patient  
13 empowerment, disease-related self-care and prevention of a decay of the functional  
14 capacity of patients with T2D.  
15  
16  
17  
18  
19  
20  
21

22 The Scientific Ethical Committee at the Capital Region of Denmark (H-1-  
23 2014-074), and the Danish Data Protection Agency (j.nr. 2014-54-0897) have approved the  
24 trial. The InterWalk application is approved by the Danish Data Protection Agency (2008-  
25 58-0035). The trial has been registered at <http://www.clinicaltrials.org> (NCT02341690) on  
26 January 9<sup>th</sup>, 2015. Amendments to the protocol will be approved by the Scientific Ethical  
27 Committee at the Capital Region of Denmark. Amendments will be reported to  
28 <http://www.clinicaltrials.org>. The trial is conducted in accordance with the Helsinki  
29 Declaration.  
30  
31  
32  
33  
34  
35  
36  
37  
38  
39  
40  
41

## 42 **Participants**

### 43 *Eligibility*

44 All non-complicated patients diagnosed with T2D (out-patients), referred to a health  
45 promotion centre or hospital in the participating municipalities by their GP, are eligible if  
46 more than 18 years of age. A flow chart of participants is presented in Figure 2.  
47  
48  
49  
50  
51  
52  
53  
54  
55  
56  
57  
58  
59  
60

[INSERT FIGURE 2 ABOUT HERE]

The exclusion criteria are medical contraindications to exercise e.g. chronic complications in the locomotive apparatus, painful osteoarthritis or heart conditions.[24] Information is collected through medical records and at a screening interview with a health professional at the health promotion centre. Furthermore, patients are excluded if they do not want to be physically active in the rehabilitation setting or are already participating in other intervention studies at a health promotion centre. The patients have to be able to talk, read and understand the Danish language (for overview over in- and exclusion criterion, see Table 1).

---

**Table 1. ELIGIBILITY CRITERIA**

---

**Inclusion criteria**

- Diagnosed with type 2 diabetes
- Referred by General practitioner to a health promoting center in participating municipality or hospital

**Exclusion criteria**

- < 18 years of age
  - Medical contraindications to exercise
  - Already participating in other exercise trials
  - Does not talk and read Danish
- 

If eligible, health professionals give oral and formalized written information with two days to consider participation in the trial. Written informed consent is obtained before any additional trial procedures. Enrolment was initiated in January 2015 and recruitment is terminated on December 15<sup>th</sup> 2016. Last-patient-last-visit is expected in December 2017.

## Interventions

The trial is developed in collaboration with the health professionals from the municipality of Copenhagen in Denmark. The interventions are designed to reflect the clinical rehabilitation settings in Denmark in order to increase the likelihood of implementation of the programme following this trial, if proven superior. The investigators (LSV, CB and HL) led four workshops (16 hours in total) with the health professionals during year 2014, in which the interventions of the study and work routines were discussed in detail. Furthermore, all participating health professionals underwent a thorough education program (15 hours in total) involving all procedures and manuals in the trial. This was done to ensure a standardization of all procedures throughout the trial. In addition, consecutive workshops were and are held from the start of the trial (January 2014) every second month to secure all routines and education level for all health professionals throughout the trial. The applicability of the trial results is hereby increased, as the interventions are already part of the rehabilitation programme offered to patients with T2D in the municipalities.

The interventions in the trial consist of two phases (Figure 1). In phase one (8-12 weeks), patients are randomised to either a standard care group (control intervention) or an experimental group doing IWT using the InterWalk app. The present trial uses the standard care programme as control intervention and is conducted directly in the clinical

## Effect of Interval walking on type 2 diabetics

BMJ Open

1  
2  
3  
4  
5  
6  
7  
8  
9 setting. All patients receive supervision across phase one. In phase two (40-44 weeks),  
10 patients in the standard care group have no follow-up until 52 weeks post baseline. Patients  
11 in the experimental intervention group are in phase two randomly allocated to either IWT  
12 with or without motivational support (see section Experimental intervention – Interval  
13 Walking with the InterWalk application). Additional rehabilitation care (co-interventions)  
14 with disease-specific patient education, diet counseling and smoking cessation is offered to  
15 all patients across the intervention groups. The interventions are summarized in Table 2.  
16  
17  
18  
19  
20  
21  
22  
23  
24  
25  
26  
27  
28  
29  
30  
31  
32  
33  
34  
35  
36  
37  
38  
39  
40  
41  
42  
43  
44  
45  
46  
47  
48  
49  
50  
51  
52  
53  
54  
55  
56  
57  
58  
59  
60

Effect of Interval walking on type 2 diabetics

BMJ Open

1  
2  
3  
4  
5  
6  
7  
8  
9  
10  
11  
12  
13  
14  
15  
16  
17  
18  
19  
20  
21  
22  
23  
24  
25  
26  
27  
28  
29  
30  
31  
32  
33  
34  
35  
36  
37  
38  
39  
40  
41  
42  
43  
44  
45  
46  
47  
48  
49

**Table 2. INTERVENTIONS IN THE TRIAL DURING PHASE ONE AND TWO**

| <b>PHASE ONE</b>                                                                        |                                                                                                                                                                                                                                                                                                                                                                                                                                                                                                        |
|-----------------------------------------------------------------------------------------|--------------------------------------------------------------------------------------------------------------------------------------------------------------------------------------------------------------------------------------------------------------------------------------------------------------------------------------------------------------------------------------------------------------------------------------------------------------------------------------------------------|
| <b>STANDARD CARE (CONTROL INTERVENTION)</b>                                             |                                                                                                                                                                                                                                                                                                                                                                                                                                                                                                        |
| <b>Group based training at the health promotion center (Control intervention) (1/3)</b> | <ul style="list-style-type: none"> <li>• Group based sessions with 4-12 patients</li> <li>• Two sessions per week at the health promotion center</li> <li>• Warm-up exercises</li> <li>• Cardio-respiratory exercises</li> <li>• Resistance training</li> <li>• Cool down period</li> </ul>                                                                                                                                                                                                            |
| <b>EXPERIMENTAL INTERVENTION</b>                                                        |                                                                                                                                                                                                                                                                                                                                                                                                                                                                                                        |
| <b>Interval Waling Training (IWT) (2/3)</b>                                             | <ul style="list-style-type: none"> <li>• Group based interval walking training (IWT) using the InterWalk app</li> <li>• Introduction to the InterWalk app</li> <li>• Follow-up instructions and guidance</li> <li>• IWT using the InterWalk app</li> <li>• Three times per week, 60 minutes per session, twice a week at a health promotion center</li> <li>• End of phase one: preparation to continue IWT with IW app in the end of the intervention period, through a transition program</li> </ul> |
| <b>PHASE TWO</b>                                                                        |                                                                                                                                                                                                                                                                                                                                                                                                                                                                                                        |
| <b>STANDARD CARE (CONTROL INTERVENTION)</b>                                             |                                                                                                                                                                                                                                                                                                                                                                                                                                                                                                        |
| <b>Group based training at the health promotion center (Control intervention) (1/3)</b> | <ul style="list-style-type: none"> <li>• No intervention at the health promotion center</li> <li>• Follow-up at 52-week</li> </ul>                                                                                                                                                                                                                                                                                                                                                                     |
| <b>EXPERIMENTAL INTERVENTION</b>                                                        |                                                                                                                                                                                                                                                                                                                                                                                                                                                                                                        |
| <b>IWTgroup (1/3)</b>                                                                   | <ul style="list-style-type: none"> <li>• No intervention at the health promotion center</li> <li>• Follow-up at 52-weeks</li> </ul>                                                                                                                                                                                                                                                                                                                                                                    |



Effect of Interval walking on type 2 diabetics

BMJ Open

1  
2  
3  
4  
5  
6  
7  
8  
9  
10  
11  
12  
13  
14  
15  
16  
17  
18  
19  
20  
21  
22  
23  
24  
25  
26  
27  
28  
29  
30  
31  
32  
33  
34  
35  
36  
37  
38  
39  
40  
41  
42  
43  
44  
45  
46  
47  
48  
49

|                                                           |                                                                                                                                                                                                                                                                                                                                                                                                                                                                                                                                                                                                                                                                                                                                                                                                                                                                                                                                                                                                                                                                                                                                                                                                                                                                    |
|-----------------------------------------------------------|--------------------------------------------------------------------------------------------------------------------------------------------------------------------------------------------------------------------------------------------------------------------------------------------------------------------------------------------------------------------------------------------------------------------------------------------------------------------------------------------------------------------------------------------------------------------------------------------------------------------------------------------------------------------------------------------------------------------------------------------------------------------------------------------------------------------------------------------------------------------------------------------------------------------------------------------------------------------------------------------------------------------------------------------------------------------------------------------------------------------------------------------------------------------------------------------------------------------------------------------------------------------|
|                                                           | <p><b>IWTsupport-group (1/3)</b></p> <p><b>Motivational Support</b></p> <p><b>1. Motivational interviews with individual goal setting</b></p> <ul style="list-style-type: none"> <li>• Four motivational interviews are scheduled in phase two: week 16, 20, 28, 40</li> <li>• Individual goal setting related to everyday life following the SMART-principle.</li> <li>• The aim of goal setting is to help the patient reflect on their physical activity habits</li> </ul> <p><b>2. Short Message Service (SMS)</b><br/><i>One weekly SMS and one SMS every fourth week</i></p> <ul style="list-style-type: none"> <li>• Weekly SMS</li> <li>• The reply indicates amount of IWT during the past week (none, 1-2 or 3 or more)</li> <li>• If no reply for two consecutive weeks, or if the reply indicates none-walking, then the patient is contacted by phone by a health professional</li> <li>• SMS every fourth week</li> <li>• Encourages the patient to make a new walking test using the InterWalk app</li> </ul> <p><b>3. Interval Walking Ambassadors</b></p> <ul style="list-style-type: none"> <li>• Educated patients with T2D do interval walking in local community near the health promotion centers</li> <li>• One session per week</li> </ul> |
| <p><b>Co-interventions (Across phase one and two)</b></p> | <p><b>ADDITIONAL REHABILITATION CARE (CO-INTERVENTIONS) WITH SPECIFIC FOCUS AREAS</b></p> <p><b>Patient education</b></p> <p>Disease related education regarding living with type 2 diabetes, empowerment and self-management and medication handled by either medical doctor, a nurse, physical therapist or dietitian and another patient with type 2 diabetes - group based or individually handled</p> <p><b>Diet counseling</b></p> <p>Diabetes specific diet counseling - group based or individually handled by a dietitian</p> <p><b>Smoking Cessation</b></p> <p>Smoking cessation courses is handled by smoking cessation counselors<br/>The course lasts 10-12 hours and can be either individually or group based</p>                                                                                                                                                                                                                                                                                                                                                                                                                                                                                                                                  |

1  
2  
3  
4  
5  
6  
7  
8  
9  
10  
11  
12  
13  
14  
15  
16  
17  
18  
19  
20  
21  
22  
23  
24  
25  
26  
27  
28  
29  
30  
31  
32  
33  
34  
35  
36  
37  
38  
39  
40  
41  
42  
43  
44  
45  
46  
47  
48  
49  
50  
51  
52  
53  
54  
55  
56  
57  
58  
59  
60

***Experimental intervention – Interval Walking with the InterWalk application***

Patients allocated to the experimental intervention do interval walking after baseline test provided by health professionals (phase one). IWT is provided by health professionals to smaller groups of 3-12 patients. After the intervention period in phase two patients are allocated to either receive IWT without motivational support during follow-up (IWTgroup) or IWT with motivational support during follow-up (IWTsupport-group) (Figure 1). Trained health professionals conduct the IWT sessions (see below) and the motivational support in phase two. Table 2 gives an example of a typical week with interval walking in the experimental intervention group.

***Interval Walking Training using The InterWalk Application***

Interval walking training is performed using the InterWalk app, which works as a personal trainer as well as a monitoring unit allowing researchers to continuously and automatically monitor and store the physical activity level in a central database (Figure 3).[16]

Interval walking is personalized through a standardised eight-minute walking test, performed with the app before engaging in IWT.[25] The InterWalk app guides the user in IWT with repeated cycles of 3 minutes fast and 3 minutes slow walking. During Interval Walking Training (IWT) the InterWalk app provides the patient with continuous feedback on the walking speed. The patients are able to track exercise history and receive historic feedback on the quality of the IWT session using the app. The feedback system employs the

1  
2  
3  
4  
5  
6  
7  
8 on-board accelerometer of the phone and GPS system to assess intensity and geographical  
9 location. Information on training intensity, total number of steps per day, IWT-data and data  
10 from the standardised walking test is stored in the smartphone or iPod and automatically  
11 transmitted to the central database at the Danish Strategic Research Centre for Type 2  
12 Diabetes (DD2) when connected to Wi-Fi or mobile data network.[16]  
13  
14  
15  
16  
17  
18  
19  
20  
21

22 [INSERT FIGURE/IMAGE 3 ABOUT HERE]  
23  
24  
25

### 26 *Experimental intervention, phase one*

27  
28 The patient receives a thorough introduction to the InterWalk app with follow-up  
29 instructions. The introduction consists of information and test of the app and the patient can  
30 ask clarifying questions if needed. A detailed manual regarding the InterWalk app is  
31 extradited to each patient. The health professional provides technical guidance and helps the  
32 patient to structure an everyday life with interval walking during phase one. Patients are  
33 encouraged to perform IWT using the InterWalk app (see section: InterWalk walking  
34 training using the InterWalk Application) as a minimum three times per week, 30 to 60  
35 minutes per session, with two of the sessions taking place at the health promotion centre and  
36 the third is conducted in the patient's everyday life environment. The aim is that all patients  
37 are capable of continuing IWT using the InterWalk app at the end of phase one (Table 3).  
38  
39  
40  
41  
42  
43  
44  
45  
46  
47  
48  
49  
50  
51  
52  
53  
54  
55  
56  
57  
58  
59  
60

Effect of Interval walking on type 2 diabetics

BMJ Open

Table 3, EXAMPLE OF EXPERIMENTAL INTERVENTION FOR ONE WEEK IN PHASE ONE

| Weekday          | Intervention at the Health promotion center                                                                                                                                                                                                                                                                                                                                                                                                                                                                                                                                                                                                                                                                           | Independent training in own environment                                                     | Notes to health professionals                                                                                                                                                                                                                                                                                            |
|------------------|-----------------------------------------------------------------------------------------------------------------------------------------------------------------------------------------------------------------------------------------------------------------------------------------------------------------------------------------------------------------------------------------------------------------------------------------------------------------------------------------------------------------------------------------------------------------------------------------------------------------------------------------------------------------------------------------------------------------------|---------------------------------------------------------------------------------------------|--------------------------------------------------------------------------------------------------------------------------------------------------------------------------------------------------------------------------------------------------------------------------------------------------------------------------|
| <i>Monday</i>    | Duration: 90 minutes<br>1. Warm-up: short walk to the walking point (either a park or an area near the center)<br>2. Interval walking: every patient do interval walking with the InterWalk app for a minimum of 30 minutes. The health professionals guide and facilitate the walking.<br>3. Group conversation: takes place at the health promotion center after doing interval walking with all participation patients. Here different focus areas are discussed in the group. The health professional participates as a facilitators in the group conversation (examples of focus areas: weather conditions, motivation for exercise, social needs when waking, motivation for a physically active everyday life) |                                                                                             | <ul style="list-style-type: none"> <li>• Make sure to encourage doing interval walking alone or together with other patients participating in interval walking at the health promotion center.</li> <li>• If some of the patients need to do a new walking test help should be given during the intervention.</li> </ul> |
| <i>Tuesday</i>   | Rest day                                                                                                                                                                                                                                                                                                                                                                                                                                                                                                                                                                                                                                                                                                              |                                                                                             |                                                                                                                                                                                                                                                                                                                          |
| <i>Wednesday</i> | Duration: 90 minutes<br>1. Warm-up: short walk to the walking point (either a park or an area near the center)<br>2. Interval walking: every patient do interval walking with the InterWalk app for a minimum of 30 minutes. The health professionals guide and facilitate the walking.<br>3. Group conversation: takes place at the health promotion center after doing interval walking with all participation patients. Here different focus areas are discussed in the group. The health professional participates as a facilitators in the group conversation (examples of focus areas: weather conditions, motivation for exercise, social needs when waking, motivation for a physically active everyday life) |                                                                                             |                                                                                                                                                                                                                                                                                                                          |
| <i>Thursday</i>  | Rest day                                                                                                                                                                                                                                                                                                                                                                                                                                                                                                                                                                                                                                                                                                              |                                                                                             |                                                                                                                                                                                                                                                                                                                          |
| <i>Friday</i>    | Rest day                                                                                                                                                                                                                                                                                                                                                                                                                                                                                                                                                                                                                                                                                                              |                                                                                             |                                                                                                                                                                                                                                                                                                                          |
| <i>Saturday</i>  |                                                                                                                                                                                                                                                                                                                                                                                                                                                                                                                                                                                                                                                                                                                       | Interval walking using the InterWalk application for 30-60 minutes.<br>Can be done alone or |                                                                                                                                                                                                                                                                                                                          |

## Effect of Interval walking on type 2 diabetics

BMJ Open

together with other  
patients.

---

*Sunday*      Rest day

Patients allocated to the experimental intervention do interval walking twice a week, 30 to 60 minutes per session during phase one at the health promotion center in small groups of 3-12 patients. A third session is conducted in the patient's everyday life environment.

For peer review only

1  
2  
3  
4  
5  
6  
7  
8  
9  
10  
11  
12  
13  
14  
15  
16  
17  
18  
19  
20  
21  
22  
23  
24  
25  
26  
27  
28  
29  
30  
31  
32  
33  
34  
35  
36  
37  
38  
39  
40  
41  
42  
43  
44  
45  
46  
47  
48  
49  
50  
51  
52  
53  
54  
55  
56  
57  
58  
59  
60

*Experimental intervention, phase two*

In phase two patients in the experimental intervention group are randomly allocated into two follow-up conditions: with unsupervised interval walking training without support (IWTgroup) or with motivational support (IWTsupport-group) following the intervention period until 52-week follow-up (see Figure 1).

*Interval Walking Group without support (IWTgroup)*

All patients in the Interval Walking Group (IWTgroup) are encouraged to continue to perform IWT with the InterWalk app three times a week, 30 to 60 minutes per session. The patients are not provided with any follow-up or support from health professionals from the end of the intervention period until follow-up at 52-weeks. However, patients are allowed to contact the health professionals at the health promotion centre at any time if necessary.

*Interval Walking Group with support (IWTsupport-group)*

Patients in the Interval Walking Group with support (IWTsupport-group) are also encouraged to do IWT with the InterWalk app three times per week. All patients in the IWTsupport-group receive additional motivational support by the health professionals at the promotion centre (see below for information regarding the motivational support).

*Motivational support (phase two)*

The motivational support is summarised in Table 4. The motivational intervention consists of four motivational interviews with individual goal setting and weekly Short Message

Service via the mobile phone (a SMS-track), (see Figure 5 and 6). Furthermore, patients have the opportunity to participate in IWT at predefined timeslots with an Interval Walking Ambassador in the local community near the health promotion centre (see Figure 1).

*Motivational interview and goal setting:* The Motivational interview is used to structure the communication between the patient and the health professional. The interview works as a partnership where focused and detailed questions reveal and visualize the patients motivation and barriers towards behaviour change and acknowledgement of patient autonomy.[26] Four motivational interviews are scheduled for each patient in the IWT support-group. See Table 4 for more detail. The interviews seek to help the patients reflect on their physically active habits and to set individual motivating goals related to everyday life.[27] The goal setting is based on the S.M.A.R.T.-principle derived from the Goal Setting Theory developed by Edwin Locke.[28] S stands for Specific (e.g. what do I want to accomplish?), M for Measurable (e.g. specific and measurable), A for achievable (realistic), R for relevant (individual goals) and T for timely (not too big to achieve in a short period).[29]

**Table 4. MOTIVATIONAL INTERVIEWS WITH INDIVIDUAL GOAL SETTING  
PHASE TWO, IWTsupport-group**

|                                                                   |                                                                                                                                                                                                                                                                                                                                                                                                                                                          |
|-------------------------------------------------------------------|----------------------------------------------------------------------------------------------------------------------------------------------------------------------------------------------------------------------------------------------------------------------------------------------------------------------------------------------------------------------------------------------------------------------------------------------------------|
| <i>Four motivational interviews with individual goal setting,</i> | <p>The interviews aim at helping the patient to reflect on why and how physical activity can be incorporated in everyday life</p> <ul style="list-style-type: none"> <li>○ Make informed choices regarding behavioral changes regarding physical activity</li> <li>○ Relate to own everyday life</li> <li>○ Clarify barriers and facilitators of importance for the individual</li> </ul> <p>Two to three individual goals are set at all interviews</p> |
|-------------------------------------------------------------------|----------------------------------------------------------------------------------------------------------------------------------------------------------------------------------------------------------------------------------------------------------------------------------------------------------------------------------------------------------------------------------------------------------------------------------------------------------|

---

The goals is based on need in the individual everyday life

---

A short resume with the individual goal setting is written after all interviews in the database.

The written text is prospectively incorporated in the following interviews with the patient at the health promotion center

---

The interviews are placed in Week 16, 20, 28, 40 post baseline-test. Goal setting in the interviews are based on the *the S.M.A.R.T.- principle derived from the Goal Setting Theory developed by Edwin Locke*. [28]

*Short Message Service (henceforth referred to as text message)* enables inexpensive and possibly effective interaction between patients and health professionals at any time or place.[30,31] Communication as well as feedback is believed to enhance motivation through feelings of competence and relatedness [32], which may positively affect adherence to treatment. Text messages have shown positive effect on various health outcomes including diabetes self-management when used in behavior change interventions. Further, a higher effectiveness and lower attrition rate has been observed when customized and tailored messages is used.[30] In the present study, the patient receives two types of text messages during phase two (see Figure 4 and 5). The first type is a weekly and interactive text message consisting of questions regarding the amount of IWT performed during the past week (see Figure 4). The patients are required to give feedback by returning a text message with one of the three response options provided. If the patient does not reply for two consecutive weeks, or if the patient answers that she/he has not been walking, a personal phone call to the patient is conducted from a health professional from the local health promotion centre. The aim of the call is to encourage and help the patient to plan IWT to fit the individual life of the patient. The second type of text message is sent every fourth week,



1  
2  
3  
4  
5  
6  
7  
8 encouraging the patients to perform the walking test using the InterWalk app without a  
9 requirement of feedback (see Figure 5).  
10  
11

12  
13  
14  
15 [INSERT FIGURE 4 AND 5 ABOUT HERE]  
16  
17

18  
19  
20 *Interval Walking Ambassadors:* Using peers to educate other patients with  
21 T2D has shown effective in providing ongoing support over a longer period.[33,34] In this  
22 study, volunteer patients with T2D are recruited through the Danish Diabetes Association,  
23 where a consultant contacts possible patients via e-mail. The Interval Walking Ambassadors  
24 do IWT locally in phase two with patients from the IWTsupport group. The Interval  
25 Walking Ambassadors receives a two-day training programme in the participating  
26 municipality by researchers from the InterWalk research group. At any time during phase  
27 two, patients can attend IWT at predefined timeslots with an Interval Walking Ambassador  
28 (see Table 2).  
29  
30  
31  
32  
33  
34  
35  
36  
37  
38  
39  
40  
41

#### 42 *Adherence to interventions*

43  
44 To prevent patients from dropping out during phase one of the trial, patients are contacted  
45 by phone by a trained health professional if they fail to appear at the planned training  
46 sessions. Up to five attempts are made to contact the patient. In phase two only patients  
47 allocated to the IWTsupport-group are monitored by SMS-track and supervised during the  
48  
49  
50  
51  
52  
53  
54  
55  
56  
57  
58  
59  
60

1  
2  
3  
4  
5  
6  
7  
8  
9  
10  
11  
12  
13  
14  
15  
16  
17  
18  
19  
20  
21  
22  
23  
24  
25  
26  
27  
28  
29  
30  
31  
32  
33  
34  
35  
36  
37  
38  
39  
40  
41  
42  
43  
44  
45  
46  
47  
48  
49  
50  
51  
52  
53  
54  
55  
56  
57  
58  
59  
60

phase until week 52. Patients in IWTgroup have no contact with the health professionals until 52-weeks follow-up (see Figure 1).

### ***Control intervention – Standard care***

Patients in the control group receive the standard rehabilitation treatment offered to patients with T2D in Denmark in a multimodal setting including physical activity (phase one, Figure 1). The duration of rehabilitation treatment differs between participating municipalities, but may not be shorter than eight weeks during phase one. At the end of the standard care rehabilitation program in the municipalities there is no follow-up on the exercise intervention, which is the normal procedure in Danish municipalities (phase two, Figure 1).[35]

The participating municipalities offer group exercise twice a week at the health promotion centres with 6-15 patients participating depending on the population size in the participating municipality. The content of the group exercise period is based on clinical guidelines in Denmark. A typical session is structured with first a short warm-up session followed by a strength and cardio part and finished with a cool-down period with strengthening (See Table 2). Furthermore, it is recommended that the patients have regularly consultation at the general practitioner every third month.

### ***Additional rehabilitation care (Co-interventions)***

1  
2  
3  
4  
5  
6  
7  
8  
9 All patients receiving rehabilitation at either a health promotion centre or at the hospital  
10 receives an offer of specific disease related patient education, diet counselling and smoking  
11 cessation.[35] It is optional whether the patient participate in one or all additional offers.  
12

13  
14 *Disease specific patient education* includes a section focused on behaviour modification  
15 and self-management and a specific part on diseases were the patients get knowledge  
16 regarding sequelae. *Diet counselling* regarding nutritional advice when living with T2D is  
17 handled by a dietitian. *Smoking cessation* is either group based or in individual process and  
18 is handled by smoking cessation counsellors.  
19  
20  
21  
22  
23  
24  
25  
26  
27

### 28 **Trial endpoints and Assessments**

29  
30 Data on the primary and secondary outcomes are obtained at baseline, post intervention  
31 (after 8-12 weeks) and 52 weeks after enrolment (Table 5). To standardize all  
32 measurements between health professionals and participating centres, all health  
33 professionals uses standardised protocols crafted for the trial regarding procedures and  
34 measurements. All data are entered directly in an online database (see section: Data  
35 management and quality control).  
36  
37  
38  
39  
40  
41  
42  
43  
44  
45  
46  
47  
48  
49  
50  
51  
52  
53  
54  
55  
56  
57  
58  
59  
60

## Effect of Interval walking on type 2 diabetics

Table 5, SUMMARY OF DATA COLLECTION AND MEASURES

| Measurements                                         | Description                                                                          | Baseline | 8-12 weeks | 52 weeks |
|------------------------------------------------------|--------------------------------------------------------------------------------------|----------|------------|----------|
| <i>Demographic</i> <sup>*†‡</sup>                    |                                                                                      |          |            |          |
| Age (median)                                         | Obtained using self report                                                           | x        | -          | -        |
| Women                                                |                                                                                      | x        | -          | -        |
| Marital status                                       |                                                                                      | x        | -          | -        |
| Diabetes duration                                    |                                                                                      | x        | -          | -        |
| Education level                                      |                                                                                      | x        | -          | -        |
| Height, weight, body mass index                      | Obtained using standard procedures                                                   | x        | x          | x        |
| <i>Medical history</i> <sup>*†‡</sup>                |                                                                                      |          |            |          |
| History of Heart disease                             | Obtained using medical records                                                       | x        | x          | x        |
| Hypertension                                         |                                                                                      | x        | x          | x        |
| Kidney disease                                       |                                                                                      | x        | x          | x        |
| Chronic Obstructive Pulmonary Disease (COPD)         | Defined by FEV1<70%                                                                  | x        | x          | x        |
| <i>Medicine</i> <sup>*†</sup>                        |                                                                                      |          |            |          |
| Self-reported use of medication                      |                                                                                      | x        | x          | x        |
| Register-data use of medicine                        |                                                                                      | x        | x          | x        |
| <i>Physical fitness</i> <sup>*</sup>                 |                                                                                      |          |            |          |
| Moderate-to-Vigorous-intensity                       | Accelerometer (Axivity AX3, Newcastle, UK), worn for seven consecutive days, 3 times | x        | x          | x        |
| Total physical activity                              | InterWalk - Walking test performed using an iPod touch or iPhone                     | x        | x          | x        |
| <i>Strength</i> <sup>*</sup>                         | Lower extremities Sit-To-Stand                                                       | x        | x          | x        |
| <i>Patient Reported Outcomes (PROs)</i> <sup>*</sup> |                                                                                      |          |            |          |
| Behavioral Regulation in Exercise                    | Obtained using BREQ-2, Behavioral Regulation in Exercise Questionnaire               | x        | x          | x        |

## Effect of Interval walking on type 2 diabetics

## BMJ Open

|                                    |                                                                                                                    |   |   |   |
|------------------------------------|--------------------------------------------------------------------------------------------------------------------|---|---|---|
| Physical Activity                  | <i>Obtained using R-PAQ, Resent Physical Activity Questionnaire</i>                                                | x | x | x |
| Health related quality of life     | <i>Obtained using SF-12, Short Form - Health Related Quality of life Questionnaire</i>                             | x | x | x |
| Automaticity of behavior           | The Self-Report Habit Index                                                                                        |   | x | x |
| Personality traits†                | <i>Obtained using NEO-FFI, Neuroticism, Extroversion and Openness – Five Factor Inventory (Personality traits)</i> | x | - | - |
| Risk behavior‡                     | <i>Obtained using SES, Sensation Seeking Scale (risk behavior)</i>                                                 | x | x | x |
| <i>Adherence to interventions*</i> |                                                                                                                    |   |   |   |
| Attendance registration            | From baseline to 8-12 weeks                                                                                        | x | x | x |
| Log in the InterWalk app           | Measured by the electronic log in the InterWalk-app                                                                | x | x | x |
| <i>Registry data assessment*‡</i>  |                                                                                                                    |   |   |   |
| Mortality, cause of death          | Obtained using medical records                                                                                     | - | x | x |
| Hospitalization                    |                                                                                                                    | - | x | x |
| Contract with general practitioner |                                                                                                                    | - | x | x |

\* Article 1: The effectiveness of smartphone delivered Interval Walking Training on moderate-and-vigorous physical activity versus standard care in patients with type 2 diabetes: a parallel group single-blinded randomized controlled trial.

†Article 2: Baseline characteristics and personality traits in patients with type 2 diabetes: descriptive study of all participants

‡Article 3: Nay Sayers – Characteristics of patients who does not want to be part of a physical activity study related to everyday life; all patients referred to the health promotion centers in the municipalities participating in the randomized controlled trial.

§Article 4: Effectiveness of smartphone delivered Interval Walking Training versus standard care in patients with type 2 diabetes on HbA1c and HDL, high-density lipoprotein; LDL, low-density lipoprotein: A sub-study to the randomized controlled trial (The InterWalk Trial, article 1), measured in a sub-sample (n=40).

### ***Primary outcome***

The primary outcome is change in moderate-to-vigorous-intensity physical activity from baseline to 52-week follow-up.

### ***Secondary outcomes***

The key secondary outcome changes in motivation for sustaining a behavioural change with physical activity in everyday life at 52-week follow-up.

Other secondary outcomes of interest are changes in patients' fitness level measured as VO<sub>2</sub>-peak by the standardised walking test (part of the InterWalk application) and health-related quality of life. Strength in the lower extremities, adherence to intervention and impact of personality traits on physical activity in everyday life are also considered exploratory secondary outcomes. All outcomes are measured at baseline, after intervention and at 52-week follow-up (see Figure 2).

### ***Data collection***

#### ***Level of daily moderate-to-vigorous-intensity physical activity***

It is important to gain knowledge into physical activity in everyday life. To determine level of daily moderate-to-vigorous-intensity physical activity a hip-mounted physical activity monitor (Axivity AX3, Newcastle, UK) is worn for seven consecutive days, at three time periods during the trial period; after baseline-test, after the intervention period and again at

1  
2  
3  
4  
5  
6  
7  
8  
9  
10  
11  
12  
13  
14  
15  
16  
17  
18  
19  
20  
21  
22  
23  
24  
25  
26  
27  
28  
29  
30  
31  
32  
33  
34  
35  
36  
37  
38  
39  
40  
41  
42  
43  
44  
45  
46  
47  
48  
49  
50  
51  
52  
53  
54  
55  
56  
57  
58  
59  
60

52-weeks follow-up. The monitor is fixed using adhesive tape (Leukomed T, BSN medical, Germany) on right side the lumbar spine. Additionally, a monitor is fixed on on the lateral side of the right thigh (Leukomed T, BSN medical, Germany) for supporting information about posture.[25] The patients are instructed not to remove the physical activity monitor at any time during the three time periods. If de-attached, the participants are trained in fixing the monitors correctly and are instructed to note the incident. If the patients need help in fixing the monitors correctly the health professionals at the health promotion centre are educated to help.

#### *Physical activity diary*

In order to validate the physical activity level during the seven days with physical activity monitors we ask the patient to complete a seven-day diary to report number of work- and sleep hours, bicycling and strength training sessions at the three time periods on a daily basis. The physical activity monitor and the diary are returned free-of-charge via mail. The patient is contacted by phone after within one week if the physical activity monitors are not returned as expected.

#### *Motivation for behaviour change with physical activity*

Changes in motivation for sustaining a behavioural change with physical activity in everyday life is measured with the Behavioural Regulation of Exercise Questionnaire

1  
2  
3  
4  
5  
6  
7  
8  
9 (BREQ-2) which measures individual motivation for physical activity. The questionnaire  
10 consists of 19 questions in a 0-4 Likert format.[36] In addition to the questionnaire, patients  
11 are asked to answer four questions in a 0-4 Likert format, regarding motivation for physical  
12 activity after being diagnosed with T2D.  
13  
14  
15  
16

### 17 18 19 20 *Health Related Quality of Life*

21 The patients Health Related Quality of Life is very important to maintain after being  
22 diagnosed with T2D.[37] To gain knowledge into the individual perception of quality of life  
23 on a physical and mental level we use the Short-Form Health Survey (SF-12). The  
24 questionnaire consists of 12 questions and uses a Likert scale of 1-3 for the physical function  
25 items; 1-5 for the bodily pain, social function, and general health perceptions items; 1-6 for  
26 the vitality and mental health; and a dichotomous scale of yes/no for the presence of role  
27 function limitations. The higher score, the higher level of health or functioning.[38]  
28  
29  
30  
31  
32  
33  
34  
35  
36  
37  
38  
39

### 40 *Maintenance of behaviour change with physical activity*

41 Automaticity of behaviour is essential when new habits become present in the everyday  
42 life.[39] To measure if the patient has adopted new habits as a result of the intervention we  
43 ask the patient to answer four questions from The Self-Report Habit Index. The Index uses a  
44 0-4 Likert format and the four questions to be answered measures automatic activation,  
45 frequency of behaviour and relevance to self-identity related to physical activity.[40]  
46  
47  
48  
49  
50  
51  
52  
53  
54  
55  
56  
57  
58  
59  
60



### *VO<sub>2</sub>-peak*

Incorporated in the InterWalk app is a standardised walking test consisting of 5 stages; 1) 30 sec. of standing still, 2) 2 min. of slow walking 3) 2 min. of walking at moderate intensity 4) 2 min. walking at high intensity 5) 1 min. walking at highest intensity possible. The four paces are self-selected (See, Figure 3 and 4). The test is performed with an iPod placed in the pocket at the hip and the instructions are delivered from the app through earphones. To ensure the right walking intensity in the intervention period, the patients are asked to perform the test every 4<sup>th</sup> week.[16]

### *Strength in the lower extremities*

The sit-to-stand test (30 seconds) measures the lower body strength and will be administered using a chair without arms. The patient is encouraged to complete as many full stands as possible within a 30-sec time limit.[41]

### *Adherence to the intervention*

Adherence is determined by an evaluation and quantification of the electronic log of data from the InterWalk app to the central database of all uploaded data.

### *Self-rated physical activity*

1  
2  
3  
4  
5  
6  
7  
8  
9 The “Recent Physical Activity Questionnaire” (RPAQ) has 9 main questions, which covers  
10 4 domains of physical activity: domestic life, work, recreation and transport. Physical  
11 Activity is estimated in MET’s (Metabolic Equivalent). In answering the questions in the  
12 questionnaire, the patient will answer in regards to the last four weeks with physical activity  
13 in the everyday life.[42]  
14  
15  
16  
17  
18  
19

### 20 21 22 *Personality traits*

23  
24 The NEO-Five Factor Inventory (NEO-FFI) [43] consists of 60 questions in a 0-4 Likert  
25 format constructed by selecting 2 items from each of the six facets characterizing each of the  
26 five personality traits (Neuroticism, Extraversion, Openness, Agreeableness,  
27 Conscientiousness) assessed by NEO-PI-R. The Sensation Seeking Scale (SES) [44] is a 40  
28 items self-administered questionnaire consisting of 40 questions designed to test the  
29 tendency towards varied, novel and intense sensations.  
30  
31  
32  
33  
34  
35  
36  
37  
38  
39

### 40 41 42 *Demographic, social economic and anthropometry measures*

43 Information on height, weight, waist and hip circumference is collected before inclusion  
44 through an electronic questionnaire at the first formal meeting at the health promotion  
45 centre. Relevant national registers will be used to obtain information regarding  
46 hospitalization, co-morbidities, medical history, use of medicine and mortality.  
47  
48  
49  
50  
51  
52  
53  
54  
55  
56  
57  
58  
59  
60

Effect of Interval walking on type 2 diabetics

BMJ Open

1  
2  
3  
4  
5  
6  
7  
8  
9  
10  
11  
12  
13  
14  
15  
16  
17  
18  
19  
20  
21  
22  
23  
24  
25  
26  
27  
28  
29  
30  
31  
32  
33  
34  
35  
36  
37  
38  
39  
40  
41  
42  
43  
44  
45  
46  
47  
48  
49  
50  
51  
52  
53  
54  
55  
56  
57  
58  
59  
60

*Height* measurement is conducted using a portable altimeter (Tanita Stadiometer). The measurement is done without shoes and is repeated two times with each measure to nearest 0,1 cm. If the two measures are dissimilar with more than 0,5 cm, then the measurement is repeated. *Weigh* is measured in kilograms (kg) using an electronic weight. The measure is repeated two times with each measure to nearest 0,1 cm. If the two measures are dissimilar with more than 0,5 kg, then the measurement is repeated a third time. The patient is weighed fully dressed and one kilo is subtracted from each measure. *Hip circumference* is measured on the skin on the crest of the hipbone. The patient is asked to place a finger in the belly bottom and the measure is done with a tape measure (2 meters) placed on the upper side of the patients' finger. If the two measures are dissimilar with more than 0,5 cm, then the measurement is repeated a third time.

#### **Safety criteria and adverse events**

Patients are informed that performing the InterWalk walking test may cause some degree of breathlessness as patients are expected to reach 80-85% of  $VO_2$ max during the walking test. All other measurements are not associated with any known risk or discomfort. Injuries linked to the intervention are registered, if informed to the health professionals at the health promotion centres, during the trial period. In case of severe adverse events, the Scientific Ethical Committee of the Capital Region of Denmark is informed.

### Sample size considerations

The minimum difference of interest (MDI) is 10 minutes per day. Based on existing experimental evidence, we expect the standard deviation (SD) of the change in moderate-and-vigorous physical activity from baseline to 12 month follow up to be between 1.2 – 2.3 times the effect size.[45,46] Therefore, SD twice the MDI (20 min of moderate-and-vigorous physical activity) per day was applied in the sample size calculations. After applying Bonferroni adjustment due to multiple comparisons in the three group trial a total of 190 participants are needed to obtain a statistical power (1- $\beta$ ) of 80% with an  $\alpha$  of 0.017 (two-tailed). Allowing for an attrition rate of 30%, 272 patients (91 in the control group and 181 in experimental group) are recruited. The setting enables recruitment until December 15<sup>st</sup> 2016. The sample size is truncated at 272 participants or the N reached at the end of recruitment period - whatever is reached first (see section ‘Participants’).

### Randomisation, sequence generation and allocation concealment

After returning the physical activity monitors patients are randomised to either standard care or experimental group after baseline test (phase one). Allocation to either IWTgroup or IWTsupport-group on patients allocated to the experimental group is concealed until after the post intervention test (phase two). A health professional associated with the trial, telephones the patient and inform about random allocation after returning the PA monitors to either IWT-group or IWTsupport-group. The patients are stratified by gender to ensure an

1  
2  
3  
4  
5  
6  
7  
8  
9 equal number across all groups. The allocation sequence is generated through a standardised  
10 computer program by an independent researcher (RC). The allocation sequence is concealed  
11 until the trial arms are assigned. A Flow of patients is depicted in Figure 2.  
12  
13

### 14 15 16 17 **Blinding**

18 The scientific staff is blinded to patient allocation from baseline to the 52-week follow-up is  
19 completed for all patients. The health professionals at the promotion centre are not blinded  
20 to allocation to either standard care or experimental groups.  
21  
22  
23  
24

### 25 26 27 28 **Statistical methods**

29 All analyses will be conducted according to the Intention-To-Treat principle. Continuous  
30 endpoints will be analysed using repeated measures analysis of covariance in a mixed  
31 linear model. Categorical and dichotomous end points will be analysed with the use of  
32 logistic regression. The model will include with group, and sex as fixed effects, with the  
33 baseline value as a covariate.  
34  
35  
36  
37  
38  
39

40  
41 All patients randomised to one treatment, will be analysed according to the  
42 treatment to which the patient was allocated, irrespective of whether they received this or  
43 some other treatment, or no treatment at all. The ITT population will be handled all patients  
44 randomised to the three treatment arms, and the dataset is equal to the “all patients  
45 randomized set” (APRS). Missing values due to patients’ absence from follow-ups or  
46 withdrawal from the study are to be expected in clinical trials. Several approaches are  
47  
48  
49  
50  
51  
52  
53  
54  
55  
56  
57  
58  
59  
60

described for handling missing data in the ITT analysis, and among them “baseline observation carried forward” (BOCF: i.e., a null-responder imputation, where the level at baseline is also considered the last). A linear mixed model analysis includes all patients with a baseline assessment, and includes both fixed and random factors. Thus, repeated linear mixed model method is chosen for the primary analyses in this trial (i.e., no data imputation), whereas the BOCF imputation, as well as the ‘Per Protocol’ population will be applied for the purpose of sensitivity analysis. Exploratory analyses of the treatment effects will be performed on the secondary outcomes.

#### ***Data management and quality control***

All data are entered in an SSL-secured, online-based database developed by the Danish Stakeholder Help2Run (CVR: 34801088). The online-based database logistically handles the data gathered at baseline, after intervention in phase one, and during follow-up (phase two) and after 52 weeks. Data on demography, measurements, tests and questionnaires are entered directly in the database available via a project-specific homepage (<http://www.runsafe.dk/mtd/login/admin-signi><https://www.runsafe.dk/mtd/login/admin-signin>). A protected back-end system (<https://www.runsafe.dk/mtd/admin>) is used to logistically handle information on demography, measurements, tests and questionnaires on each participant in the trial (for information on interval walking training using the InterWalk app see ‘*Interval Walking*

1  
2  
3  
4  
5  
6  
7  
8  
9 *Training using The InterWalk Application*’). The system was approved in 2014 after an  
10 inspection by the Danish Data Protection Agency. Access to personalized data from  
11 the InterWalk participants is only possible using a personalized username and password.  
12 Only specified researchers are allowed to administrate the back-end system and each  
13 researcher and project member with access to the back-end has a unique username and  
14 personal password for the back-end system. All activities, including changing data and  
15 downloading data, in the back-end system are logged in accordance with the rules and  
16 regulations from the Danish Data Protection Agency. A unique subject ID number will be  
17 subscribed to all patients in order to anonymize data. The identification key (ID to personal  
18 information) will be encrypted and stored securely and separately from the unique ID  
19 number on a secure database.  
20  
21  
22  
23  
24  
25  
26  
27  
28  
29  
30  
31  
32  
33  
34

### 35 ***Ethics and Dissemination***

36  
37 The InterWalk trial contributes with important knowledge on different treatment approaches  
38 in the rehabilitation of patients with T2D. Physical activity and exercise have beneficial  
39 effect on patients with T2D when the interventions are conducted in well-designed efficacy  
40 studies.[2,4,6] However, little is known on whether this effect also is present in effectiveness  
41 studies or “real-world setting” studies. These studies are of great importance and relevance  
42 regarding evidence-based medicine highlighting the importance of the InterWalk trial.  
43  
44  
45  
46  
47  
48  
49

50 The InterWalk trial has a pragmatic design that allows for different  
51 intervention periods in the participating municipalities. Furthermore, the interventions are  
52  
53  
54  
55  
56  
57  
58  
59  
60

1  
2  
3  
4  
5  
6  
7  
8  
9 conducted directly in the clinical setting giving a more reliable frame of the experienced  
10 challenges in a population with T2D. We believe that the implementation of the study results  
11 will have a smoother implementation phase, as the health professionals already are familiar  
12 with the preceding's.  
13

14  
15  
16  
17  
18 The trial gives valuable insight into the impact of different motivational and  
19 supportive tools as well as knowledge about individual motivation and the impact on  
20 sustaining a newly acquired behaviour change regarding physical activity in everyday life.  
21  
22

23  
24 Interval Walking Training is expected to be a suitable and effective way of  
25 providing moderate-vigorous physical activity for at large group of patients with T2D. IWT  
26 can be done at any time and anywhere and is thus integrated and tailored to fit individual  
27 everyday life. The overall objective is to promote lifelong physical activity for the individual  
28 and we believe that experiences from the present trial can help when planning future  
29 interventions with IWT to patients with various lifestyle diseases e.g. coronary heart  
30 diseases.  
31  
32  
33  
34  
35  
36  
37  
38

39  
40 It is a major advantage that the trial is designed as a randomised controlled trial  
41 in a “real-world setting” with a study population representing patients with T2D referred to  
42 rehabilitation. Furthermore, data and results are collected consecutively and directly in the  
43 clinical setting in which the interventions are to be used after the trial. Together with the  
44 very limited number of inclusion and exclusion criteria and a stratification of patients on  
45  
46  
47  
48  
49  
50  
51  
52  
53  
54  
55  
56  
57  
58  
59  
60



## Effect of Interval walking on type 2 diabetics

## BMJ Open

1  
2  
3  
4  
5  
6  
7  
8  
9 gender secures external validity of the trial and thus will add important information to the  
10 current body of evidence on T2D treatment.

11  
12 All data from eHealth solutions as the InterWalk app are electronically  
13 monitored. The patient is not dependent on opening hours at the health promotion centre as  
14 the InterWalk is either installed on an iPhone or an iPod. This gives a unique possibility for  
15 the patient to be physically active whenever it fits in their everyday life.  
16  
17  
18  
19  
20  
21

22 We acknowledge that physical activity only has effect when adherence is  
23 high, which is why we first compare standard care with interval walking for a shorter  
24 period (phase one) followed by a re-allocation of patients in the experimental group to  
25 either interval walking with or without motivational support (phase two). All groups have a  
26 52-week follow-up. The trial design enables us to investigate if patients are able to  
27 maintain a newly acquired behaviour change with physical activity in everyday life with or  
28 without motivational support for a longer period.  
29  
30  
31  
32  
33  
34  
35  
36

37 All personalized data and measures are stored on a central online-based  
38 database developed to logistically handle all data collected at baseline and during follow-  
39 up. The backend system (<https://www.runsafe.dk/mtd/admin/>) secures all information  
40 from each patient. The construction of the database with personalized usernames,  
41 passwords, and specific permissions to all health professionals and administering  
42 permissions to scientific staff in the backend secures all data. Furthermore, all activities are  
43 logged.  
44  
45  
46  
47  
48  
49  
50  
51  
52  
53  
54  
55  
56  
57  
58  
59  
60

1  
2  
3  
4  
5  
6  
7  
8  
9 All outcomes measures are assessed blinded to allocation at baseline and the  
10 primary outcome is assessed blinded to intervention in the experimental group after the  
11 intervention period. All measures are conducted by the health professionals at the health  
12 promotion centres and are blinded for allocation after intervention in the experimental group  
13 with IWT until after return of the physical activity monitors by the patient. All statistical  
14 analyses are blinded to researchers, reducing the risk of detection and interpretation  
15 bias.[47–49] All secondary outcomes, but VO<sub>2</sub>-peak and the Sit to Stand Test are self-  
16 reported and by nature likely to be biased. The patients answer questionnaires independently  
17 of the health professionals at the health promotion centres.  
18  
19  
20  
21  
22  
23  
24  
25  
26  
27

28 The secondary outcomes of motivation for physical activity and behaviour  
29 change are of highly importance as knowledge concerning motivational support and  
30 maintenance of effect (new habits with physical activity) to our knowledge is lacking in  
31 patients with T2D. This knowledge will help health professionals to better tailor the  
32 treatment and hereby potentially achieve a higher adherence to the programme following the  
33 supervised intervention.  
34  
35  
36  
37  
38  
39  
40  
41

42 The limitations in this trial are similar to those of other exercise trials where  
43 physical testing and time-of-day and day-to-day variation constitute a challenge. We have  
44 standardised all testing protocols for all procedures to reduce the variation and run a  
45 routine program of on-going calibration and training of the health professionals.  
46  
47  
48  
49  
50  
51  
52  
53  
54  
55  
56  
57  
58  
59  
60

1  
2  
3  
4  
5  
6  
7  
8  
9  
10  
11  
12  
13  
14  
15  
16  
17  
18  
19  
20  
21  
22  
23  
24  
25  
26  
27  
28  
29  
30  
31  
32

The trial is conducted in accordance with the Helsinki Declaration II.[50] All eligible patients receive written and oral informed consent prior to inclusion before any additional trial procedures. Data on all screened patients are registered in order to report characteristics of in-eligible patients and written informed consent is also obtained from these patients. The patients can withdraw from the trial at all times during the trial period. This has no consequence for any other future treatment. If patients discontinue the trial intervention, standard care is offered for the rest of the intervention period. All results from the trial, negative, positive or inconclusive results, are disseminated in international peer-reviewed scientific papers and at national and international conferences. We follow the guidelines from the International Committee of Medical Journal Editors when authorship is determined. The results will be reported when all long-term data become accessible.

33  
34  
35  
36  
37  
38  
39  
40  
41

Furthermore, all results are shared with the participating municipalities and participating health professionals and are used to develop future intervention and implementation strategies in the Danish municipalities.

#### 42 **Trial status**

43  
44  
45  
46  
47  
48  
49  
50  
51  
52  
53  
54  
55  
56  
57  
58  
59  
60

The inclusion period started in January 2015 and is scheduled to finish in December 2017 with a 52-week follow-up. To ensure enrolment of patients in the trial we are open for collaborations with new municipalities during the trial period. So far the trial has resulted in collaboration with both rural and urban municipalities in Denmark. The inclusion rate is

1  
2  
3  
4  
5  
6  
7  
8  
9  
10  
11  
12  
13  
14  
15  
16  
17  
18  
19  
20  
21  
22  
23  
24  
25  
26  
27  
28  
29  
30  
31  
32  
33  
34  
35  
36  
37  
38  
39  
40  
41  
42  
43  
44  
45  
46  
47  
48  
49  
50  
51  
52  
53  
54  
55  
56  
57  
58  
59  
60

carefully monitored every week by the research team. In July 2016, 210 patients had been enrolled in the trial.

**Contributors** LSV, MR-L and HL drafted the manuscript. All authors made substantial contributions to conception and design, and revised the manuscripts critically for important intellectual content. All authors have given their approval for the manuscript to be published.

**Funding.** The work has been supported by two grants by the Tryg Foundation, Denmark. The Centre for Physical Activity Research (CFAS) is supported by a grant from TrygFonden. The study was further supported by grants from. The Augustinus Foundation and two Foundations in the Capital Region of Denmark – the Foundation for Prevention and the Foundation for Intersectorial Research Projects have also supported the work.

Laura Staun Valentiner is supported by a grant from the Municipality of Copenhagen, Denmark and The Danish Physiotherapist Foundation. Mathias Ried-Larsen is supported by a post-doctoral grant from the Danish Diabetes Academy supported by the Novo Nordisk Foundation and The Vissing Foundation. CIM/CFAS is a member of DD2 - the Danish Center for Strategic Research in Type 2 Diabetes (the Danish Council for Strategic Research, grant no. 09-067009 and 09-075724). Robin Christensen is supported by grants

1  
2  
3  
4  
5  
6  
7  
8  
9 from The Oak Foundation. Henning Langberg is supported by a professor grant from the  
10 Municipality of Copenhagen, Denmark.  
11

### 12 13 14 15 **Ethics approval**

16  
17 The local regional Research Ethics Committee in Denmark (H-1-2014-074) and the Danish  
18 Data Protection Agency (j.nr. 2014-54-0897) has approved the trial.  
19  
20  
21

### 22 23 24 **Acknowledgement**

25  
26 The authors thank the health professionals in the Municipalities of Copenhagen and  
27 Guldborgsund and Bornholm Hospital in Denmark for helping recruit, test and train with  
28 all patients in the study.  
29  
30  
31

### 32 33 34 35 **Competing interests statement**

36  
37 We have read and understood The BMJ policy on declaration of interests and declare no  
38 competing interests.  
39  
40  
41  
42  
43  
44  
45  
46  
47  
48  
49  
50  
51  
52  
53  
54  
55  
56  
57  
58  
59  
60

## REFERENCES

- 1 Colberg, SR, Sigal, RJ, Fernhall, B, Regensteiner, JG, Blissmer, B, Rubin, RRR, Chanan-Taber, L, Albright, AL, Braun B. Exercise and Type 2 Diabetes. *Diabetes Care* 2010;**33**:2692–6. doi:10.2337/dc10-1548
- 2 Plotnikoff RC, Costigan S a., Karunamuni ND, *et al.* Community-based physical activity interventions for treatment of type 2 diabetes: A systematic review with meta-analysis. *Front Endocrinol (Lausanne)* 2013;**4**:1–17. doi:10.3389/fendo.2013.00003
- 3 Umpierre D, Kramer CK, Leita CB, *et al.* CLINICIAN ' S CORNER Physical Activity Advice Only or Structured With HbA 1c Levels in Type 2 Diabetes. *JAMA* 2013;**305**:190–9.
- 4 Nicolucci A, Balducci S, Cardelli P, *et al.* Relationship of exercise volume to improvements of quality of life with supervised exercise training in patients with type 2 diabetes in a randomised controlled trial : the Italian Diabetes and Exercise Study ( IDES ). *Diabetologica* 2012;**55**:579–88. doi:10.1007/s00125-011-2425-9
- 5 Vadstrup ES, Frølich A, Perrild H, *et al.* Health-related quality of life and self-related health in patients with type 2 diabetes : Effects of group-based rehabilitation versus individual counselling. *Health Qual Life Outcomes* 2011;**9**:110. doi:10.1186/1477-7525-9-110
- 6 Avery L, Flynn D, Van Wersch A, *et al.* Changing physical activity behavior in type 2 diabetes: A systematic review and meta-analysis of behavioral interventions. *Diabetes Care* 2012;**35**:2681–9. doi:10.2337/dc11-2452
- 7 Umpierre D, Kramer CK, Leita CB, *et al.* Physical Activity Advice Only or Structured. *JAMA* 2011;**305**:1790–9.
- 8 Shaw JE, Sicree R a., Zimmet PZ. Global estimates of the prevalence of diabetes for 2010 and 2030. *Diabetes Res Clin Pract* 2010;**87**:4–14. doi:10.1016/j.diabres.2009.10.007
- 9 Whiting DR, Guariguata L, Weil C, *et al.* IDF Diabetes Atlas: Global estimates of the prevalence of diabetes for 2011 and 2030. *Diabetes Res Clin Pract* 2011;**94**:311–21. doi:10.1016/j.diabres.2011.10.029
- 10 Cochrane Collaboration. Special Colection: Health of Indigenous peoples: diabetes. [http://www.cochranelibrary.com/app/content/special-collections/article/?doi=10.1002/\(ISSN\)14651858\(CAT\)Freeaccesstoreviews\(VI\)indigenoushealthdiabetes](http://www.cochranelibrary.com/app/content/special-collections/article/?doi=10.1002/(ISSN)14651858(CAT)Freeaccesstoreviews(VI)indigenoushealthdiabetes). 2015.
- 11 Policy EHealth, Europa.eu.
- 12 Di Loreto C, Fanelli C, Lucidi P, *et al.* Make Your Diabetic Patients Walk. *Diabetes Care* 2005;**28**:1295–302. doi:10.2337/diacare.28.6.1295

## Effect of Interval walking on type 2 diabetics

BMJ Open

- 1  
2  
3  
4  
5  
6  
7  
8  
9  
10  
11  
12  
13  
14  
15  
16  
17  
18  
19  
20  
21  
22  
23  
24  
25  
26  
27  
28  
29  
30  
31  
32  
33  
34  
35  
36  
37  
38  
39  
40  
41  
42  
43  
44  
45  
46  
47  
48  
49  
50  
51  
52  
53  
54  
55  
56  
57  
58  
59  
60
- 13 Eakin EG, Reeves MM, Lawler SP, *et al.* The Logan Healthy Living Program: A cluster randomized trial of a telephone-delivered physical activity and dietary behavior intervention for primary care patients with type 2 diabetes or hypertension from a socially disadvantaged community - Rationale, d. *Contemp Clin Trials* 2008;**29**:439–54. doi:10.1016/j.cct.2007.10.005
- 14 Tatara N, Årsand E, Bratteteig T, *et al.* Usage and perceptions of a mobile self-management application for people with type 2 diabetes: Qualitative study of a five-month trial. *Stud Health Technol Inform* 2013;**192**:127–31. doi:10.3233/978-1-61499-289-9-127
- 15 Karstoft K, Winding K, Knudsen SH, *et al.* The Effects of Free-Living Interval-Walking Training on Glycemic Control, Body Composition, and Physical Fitness in Type 2 Diabetic Patients. *Diabetes Care* 2013;**36**:228–36. doi:10.2337/dc12-0658.
- 16 Ried-larsen M, Thomsen RW, Berencsi K, *et al.* Implementation of interval walking training in patients with type 2 diabetes in Denmark : rationale , design , and baseline characteristics. *Clinical Epidemiol* 2016;**8**:201–9.
- 17 Saïda, T. Langberg H. *Self-Reported adherence to physical activity following physical activity referral scheme & objective measured physical activity in self-referred subgroup: A pragmatic 12 month follow-up study.* 2014.
- 18 Ogden J, Hills L. Understanding sustained behavior change: the role of life crises and the process of reinvention. *Health (London)* 2008;**12**:419–37. doi:10.1177/1363459308094417
- 19 Chan A-W, Tetzlaff JM, Gøtzsche PC, *et al.* SPIRIT 2013 explanation and elaboration: guidance for protocols of clinical trials. *BMJ* 2013;**346**:e7586. doi:10.1136/bmj.e7586
- 20 Schulz KF, Altman DG, Moher D, *et al.* Academia and Clinic Annals of Internal Medicine CONSORT 2010 Statement : Updated Guidelines for Reporting Parallel Group Randomized Trials OF TO. *Ann Intern Med* 2010;**1996**:727–32. doi:10.7326/0003-4819-152-11-201006010-00232
- 21 Thomsen RW, Nielsen JS, Ulrichsen SP, *et al.* The Danish Centre for Strategic research in type 2 diabetes (dd2) study: Collection of baseline data from the first 580 patients. *Clin Epidemiol* 2012;**4**:43–8. doi:10.2147/clep.s30083
- 22 Thygesen LC, Daasnes C, Thaulow I, *et al.* Introduction to Danish (nationwide) registers on health and social issues: Structure, access, legislation, and archiving. *Scand J Public Health* 2011;**39**:12–6. doi:10.1177/1403494811399956
- 23 Bodenheimer, Thomas. Wagner, Edward H. Grumbach K. Improving Primary Care for Patient With Chronic Illness, The Chonic Care Model, Part 2. *JAMA - J Am Med Assoc* 2002;**288**:1909–14.

- 1  
2  
3  
4  
5  
6  
7  
8  
9 24 Pedersen BK, Saltin B. Evidence for prescribing exercise as therapy in chronic  
10 disease. *Insulin* 2006;**16**:3–63. doi:10.1111/j.1600-0838.2006.00520.x
- 11 25 Brinloev, Cecilie Fau. Thorsen, Ida Kær. Karstoft, Kristian. Brøns, Charlotte.  
12 Valentiner, Laura. Langberg, Henning. Vaag, Allan Arthur, Nielsen, Jens Steen.  
13 Pedersen, Bente Klarlund. Ried-Larsen M. Criterion validity and reliability of a  
14 smartphone delivered sub-maximal fitness test for people with type 2 diabetes.  
15 *Submitt 2016*
- 16 26 Miller, WR. Rollnick S. *Motivational Interviewing: Preparing People for Change*.  
17 2nd. ed. New York, NY: Guilford Press 2002.
- 18 27 Chen SM, Creedy D, Lin H-S, *et al*. Effects of motivational interviewing intervention  
19 on self-management, psychological and glycemc outcomes in type 2 diabetes: A  
20 randomized controlled trial. *Int J Nurs Stud* 2012;**49**:637–44.  
21 doi:10.1016/j.ijnurstu.2011.11.011
- 22 28 Locke EA. Toward a Theory of Task Motivation and Incentives 1. *Organ Behav Hum*  
23 *Perform* 1968;**189**:157–89.
- 24 29 Locke EA, Latham GP. New Directions in Goal-Setting Theory. *SAGE* 2006;**15**:265–  
25 8.
- 26 30 Fjeldsoe BS, Marshall AL, Miller YD. Behavior Change Interventions Delivered by  
27 Mobile Telephone Short-Message Service. *Am J Prev Med* 2009;**36**:165–73.  
28 doi:10.1016/j.amepre.2008.09.040
- 29 31 Kongstad, Malte Bue. Valentiner, Laura Staun. Ried-Larsen, Mathias. Walker, Karen  
30 Christina. Juhl, Carsten Bogh. Langberg H. Effectiveness of remote feedback on  
31 physical activity in patients with type 2 diabetes: a systematic review and meta-  
32 analysis of randomized controlled trials. *Submitt 2016*
- 33 32 Ryan R, Deci E. Intrinsic and Extrinsic Motivations: Classic Definitions and New  
34 Directions. *Contemp Educ Psychol* 2000;**25**:54–67. doi:10.1006/ceps.1999.1020
- 35 33 Shaya T. F, Chirikov V. V, Howard D, *et al*. Effect of social networks intervention  
36 in type 2 diabetes: a partial randomised study. *J Epidemiol Community Heal*  
37 2014;**68**:326–32. doi:10.1136/jech-2013-203274
- 38 34 Paul G, Keogh K, D'Eath M, *et al*. Implementing a peer-support intervention for  
39 people with type 2 diabetes: A qualitative study. *Fam Pract* 2013;**30**:593–603.  
40 doi:10.1093/fampra/cmt027
- 41 35 Drivsholm, Thomas Bo. Snorgaard O. Organisation of treatment and follow up of  
42 patients with type 2 diabetes. *J Danish Med Assoc* 2012;**174**:2159–62.
- 43 36 Jensen, Natasja K. Christensen, KARl B. Mortensen Erik L. Valentiner, Laura S.  
44 Langberg H. Validation of the Behavioral Regulation for Exercise Questionnaire in  
45  
46  
47  
48  
49  
50  
51  
52  
53  
54  
55  
56  
57  
58  
59  
60



## Effect of Interval walking on type 2 diabetics

BMJ Open

- 1  
2  
3  
4  
5  
6  
7  
8  
9  
10  
11  
12  
13  
14  
15  
16  
17  
18  
19  
20  
21  
22  
23  
24  
25  
26  
27  
28  
29  
30  
31  
32  
33  
34  
35  
36  
37  
38  
39  
40  
41  
42  
43  
44  
45  
46  
47  
48  
49  
50  
51  
52  
53  
54  
55  
56  
57  
58  
59  
60
- Danish: measuring of motivation for exercise in people living with diabetes. *Prep* 2016.
- 37 Valentiner, Laura Staun. Egerod, Ingrid. Molin, Katrine Rutkær. Bahari-Bandari, Samareh. Langberg H. Patients with type 2 diabetes choose quality of life over health: a focus group investigation. *Submitt* 2016
- 38 Ware, John E, Kosinski Mark KS. A 12-Item Short-Form Health Survey: COstruction of Scales and Preliminary Tests of Reliability and Validity. *Med Care* 1996;**34(3)**:220–33.
- 39 Gardner B. A review and analysis of the use of “habit” in understanding, predicting and influencing health-related behaviour. *Health Psychol Rev* 2014;:1–19. doi:10.1080/17437199.2013.876238
- 40 Gardner B, Abraham C, Lally P, *et al.* Towards parsimony in habit measurement: Testing the convergent and predictive validity of an automaticity subscale of the Self-Report Habit Index. *Int J Behav Nutr Phys Act* 2012;**9**:102. doi:10.1186/1479-5868-9-102
- 41 Jones CJ, Rikli RE, Beam WC. A 30-s Chair-Stand Test as a Measure of Lower Body Strength in Community-Residing Older Adults. *Res Q Exerc Sport* 1999;**70**:113–9. doi:10.1080/02701367.1999.10608028
- 42 Golubic R, May AM, Benjaminsen Borch K, *et al.* Validity of Electronically Administered Recent Physical Activity Questionnaire (RPAQ) in Ten European Countries. *PLoS One* 2014;**9**:e92829. doi:10.1371/journal.pone.0092829
- 43 Mortensen EL, Flensburg-Madsen T, Molbo D, *et al.* Personality in Late Midlife: Associations With Demographic Factors and Cognitive Ability. *J Aging Health* 2014;**26**:21–36. doi:10.1177/0898264313519317
- 44 Zuckerman M, Kolin EA, Price L, *et al.* DEVELOPMENT OF A SENSATION-SEEKING SCALE x. 1964;**28**:477–82.
- 45 Kirk A, Mutrie N, MacIntyre P, *et al.* Effects of a 12-month activity counselling intervention on glycaemic control and on the status of cardiovascular risk factors in people with Type 2 diabetes. *Diabetologia*. 2004;**47**:821–32. doi:10.1007/s00125-004-1396-5
- 46 De Greef K, Deforche B, Tudor-Locke C, *et al.* A cognitive-behavioural pedometer-based group intervention on physical activity and sedentary behaviour in individuals with type 2 diabetes. *Health Educ Res* 2010;**25**:724–36. <http://ovidsp.ovid.com/ovidweb.cgi?T=JS&PAGE=reference&D=psyc7&NEWS=N&AN=2010-18970-002>
- 47 Savovic J, Jones HE, Altman DG, *et al.* Influence of reported study design

characteristics on intervention effect estimates from randomized, controlled trials. *Ann Intern Med* 2012;**157**:429–38. doi:10.7326/0003-4819-157-6-201209180-00537

- 48 Wood L, Egger M, Gluud LL, *et al*. Empirical evidence of bias in treatment effect estimates in controlled trials with different interventions and outcomes: meta-epidemiological study. *Bmj* 2008;**336**:601–5. doi:10.1136/bmj.39465.451748.AD
- 49 Gluud LL. Bias in clinical intervention research. *Am J Epidemiol* 2006;**163**:493–501. doi:10.1093/aje/kwj069
- 50 World Medical Association. World Medical Association Declaration of Helsinki: Ethical Principles for Medical Research Involving Human Subjects. *Clin Rev* 2013;:6–9.

peer review only

## FIGURE LEGENDS

**Figure 1.** Timeline and overview of interventions in the InterWalk trial

Phase one shows baseline-test, randomization, intervention and test after intervention. Phase two shows the re-allocation of patients in the experimental group who do interval walking training (IWT with the InterWalk app to either IWT with or without motivational support form a health professional. All patients are tested at baseline, after intervention and again at follow-up at 52 weeks

**Figure 2.** Flow-chart, The InterWalk-RCT Trial

**Figure 3.** The InterWalk front page (A), Protocol for the fitness test in the application (B), The start page for interval walking showing smileys as direct feedback to the user (C) (translated from Danish).[16]

**Figure 4.** Short Message Service (SMS), send every Sunday to patients in the IWTsupport-group

**Figure 5.** Short Message Service (SMS), Standardized walking test in the InterWalk application, send every fourth week to patients in the IWTsupport-group

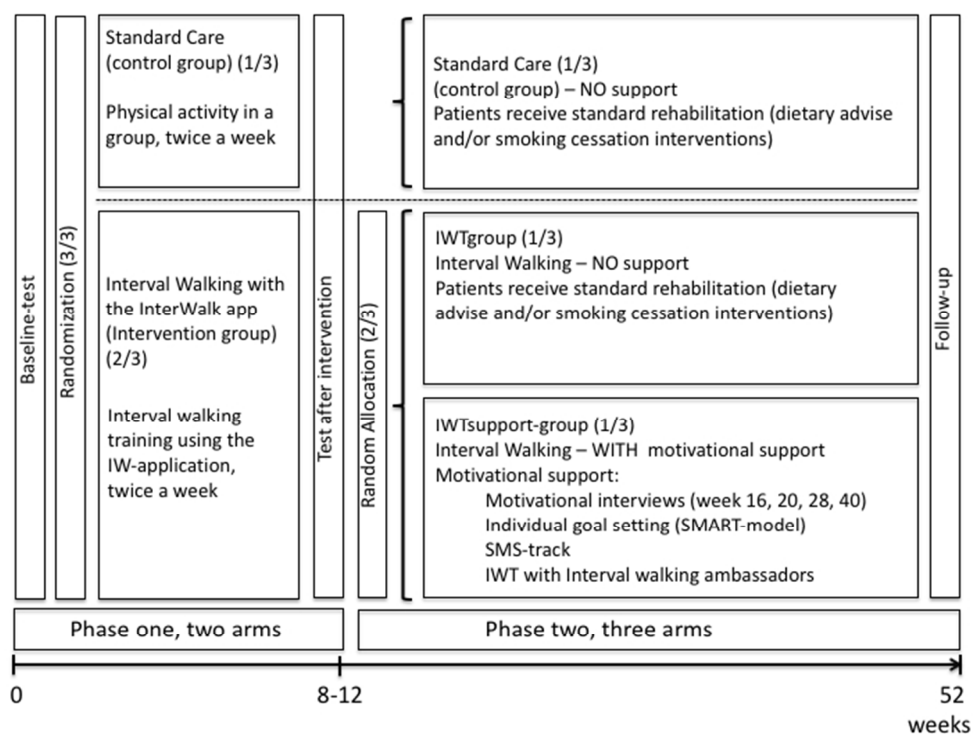

Timeline and overview of interventions in the InterWalk trial  
 Phase one shows baseline-test, randomizations, intervention and test after intervention. Phase two shows the re-allocation of patients in the experimental group who do interval walking training (IWT with the InterWalk app) to either IWT with or without motivational support from a health professional. All patients are tested at baseline, after intervention and again at follow-up at 52 weeks

Figure 1  
 254x190mm (72 x 72 DPI)

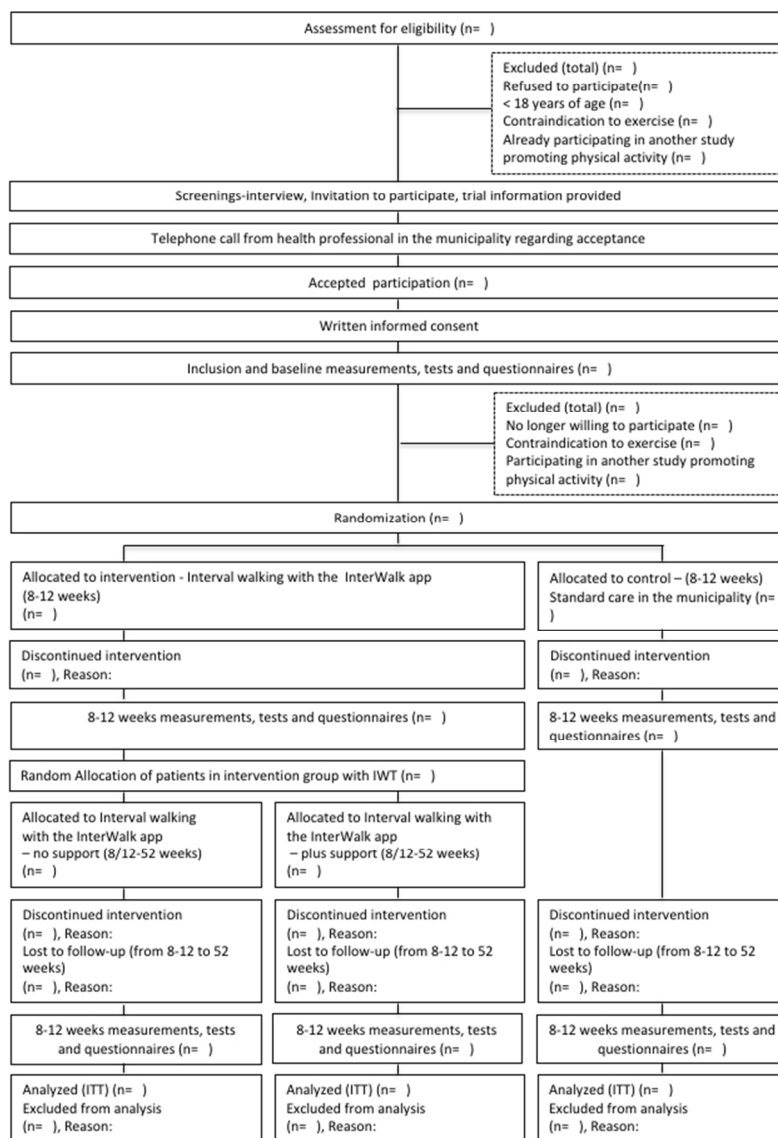

Flow-chart, The InterWalk-RCT Trial

Figure 2  
190x254mm (96 x 96 DPI)

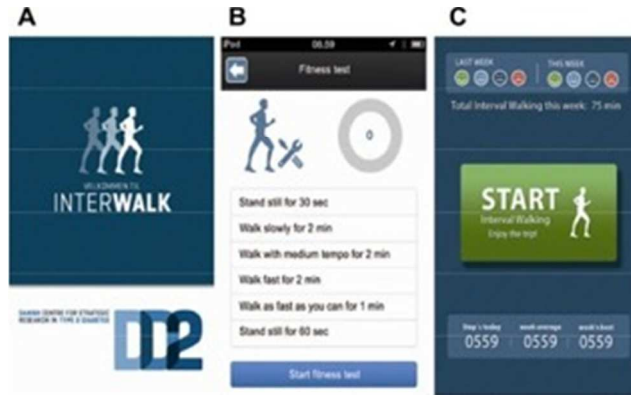

The InterWalk front page (A), Protocol for the fitness test in the application (B), The start page for interval walking showing smileys as direct feedback to the user (C) (translated from Danish).[16]

Figure 3  
112x68mm (72 x 72 DPI)

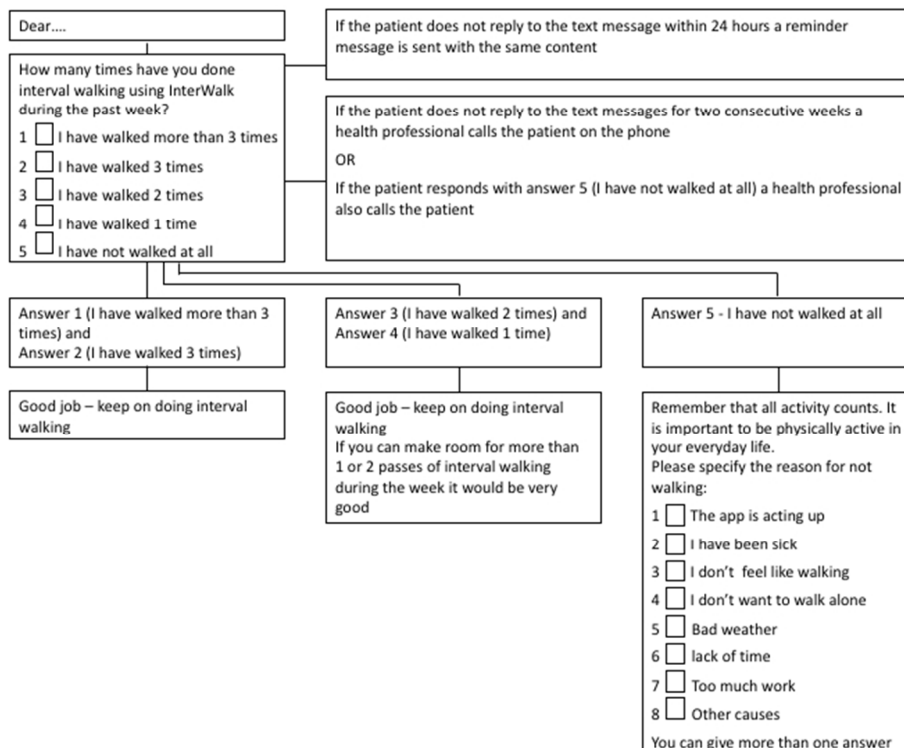

Short Message Service (SMS), send every Sunday to patients in the IWTsupport-group  
 Figure 4  
 254x190mm (72 x 72 DPI)

ew only

1  
2  
3  
4  
5  
6  
7  
8  
9  
10  
11  
12  
13  
14  
15  
16  
17  
18  
19  
20  
21  
22  
23  
24  
25  
26  
27  
28  
29  
30  
31  
32  
33  
34  
35  
36  
37  
38  
39  
40  
41  
42  
43  
44  
45  
46  
47  
48  
49  
50  
51  
52  
53  
54  
55  
56  
57  
58  
59  
60

Short Message Service (SMS)  
Standardized Walking test in the InterWalk application

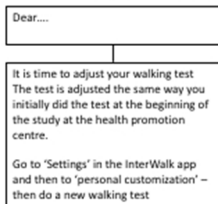

Short Message Service (SMS), Standardized walking test in the InterWalk application, send every fourth week to patients in the IWTsupport-group

Figure 5  
338x190mm (54 x 54 DPI)

Review only



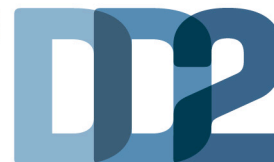

To BMJ Open

As the senior author of the published paper "*Implementation of interval walking training in patients with type 2 diabetes in Denmark: rationale, design, and baseline characteristics*" I hereby approve the use figure A, B and C in paper "*The long-term effect of smartphone-delivered Interval Walking Training on physical activity in patients with type 2 diabetes: protocol for a parallel group single-blinded randomized controlled trial*" submitted to BMJ Open by Laura Valentiner.

Original publication of the figures:

"*Implementation of interval walking training in patients with type 2 diabetes in Denmark: rationale, design, and baseline characteristics*. Ried-Larsen M, Thomsen RW, Berencsi K, Brinkløv CF, Brøns C, Valentiner LS, Karstoft K, Langberg H, Vaag AA, Pedersen BK, Nielsen JS. Clin Epidemiol. 2016 Jun 8;8:201-9. doi: 10.2147/CLEP.S97303. eCollection 2016."

Kind regards

PhD Jens Steen Nielsen

2016-08-17

A handwritten signature in blue ink, appearing to be 'J.S.', with a long horizontal line extending to the right.

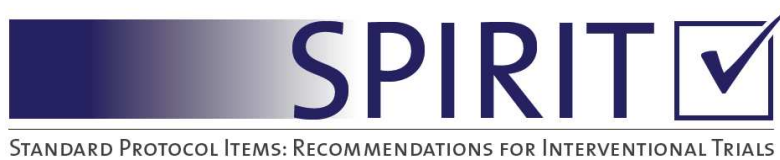

SPIRIT 2013 Checklist: Recommended items to address in a clinical trial protocol and related documents\*

| Section/Item                                              | ItemNo | Description                                                                                                                                                                                                                                                                              | Page                         |
|-----------------------------------------------------------|--------|------------------------------------------------------------------------------------------------------------------------------------------------------------------------------------------------------------------------------------------------------------------------------------------|------------------------------|
| <b>Administrative information</b>                         |        |                                                                                                                                                                                                                                                                                          |                              |
| Title                                                     | 1      | Descriptive title identifying the study design, population, interventions, and, if applicable, trial acronym                                                                                                                                                                             | 1                            |
| Trial registration                                        | 2a     | Trial identifier and registry name. If not yet registered, name of intended registry                                                                                                                                                                                                     | 2 & 5                        |
|                                                           | 2b     | All items from the World Health Organization Trial Registration Data Set                                                                                                                                                                                                                 | 4, 31, 1, 5, 7-22, 6, 26, 23 |
| Protocol version                                          | 3      | Date and version identifier                                                                                                                                                                                                                                                              | N/A                          |
| Funding                                                   | 4      | Sources and types of financial, material, and other support                                                                                                                                                                                                                              | 33                           |
| Roles and responsibilities                                | 5a     | Names, affiliations, and roles of protocol contributors                                                                                                                                                                                                                                  | 33                           |
|                                                           | 5b     | Name and contact information for the trial sponsor                                                                                                                                                                                                                                       | N/A                          |
|                                                           | 5c     | Role of study sponsor and funders, if any, in study design; collection, management, analysis, and interpretation of data; writing of the report; and the decision to submit the report for publication, including whether they will have ultimate authority over any of these activities | N/A                          |
|                                                           | 5d     | Composition, roles, and responsibilities of the coordinating centre, steering committee, endpoint adjudication committee, data management team, and other individuals or groups overseeing the trial, if applicable (see Item 21a for data monitoring committee)                         | 7, 16, 17, 31                |
| <b>Introduction</b>                                       |        |                                                                                                                                                                                                                                                                                          |                              |
| Background and rationale                                  | 6a     | Description of research question and justification for undertaking the trial, including summary of relevant studies (published and unpublished) examining benefits and harms for each intervention                                                                                       | 3, 7-22                      |
|                                                           | 6b     | Explanation for choice of comparators                                                                                                                                                                                                                                                    | 4, 16, 29                    |
| Objectives                                                | 7      | Specific objectives or hypotheses                                                                                                                                                                                                                                                        | 4                            |
| Trial design                                              | 8      | Description of trial design including type of trial (eg, parallel group, crossover, factorial, single group), allocation ratio, and framework (eg, superiority, equivalence, noninferiority, exploratory)                                                                                | 4                            |
| <b>Methods: Participants, interventions, and outcomes</b> |        |                                                                                                                                                                                                                                                                                          |                              |
| Study setting                                             | 9      | Description of study settings (eg, community clinic, academic hospital) and list of countries where data will be collected. Reference to where list of study sites can be obtained                                                                                                       | 4                            |
| Eligibility criteria                                      | 10     | Inclusion and exclusion criteria for participants. If applicable, eligibility criteria for study centres and individuals who will perform the interventions (eg, surgeons, psychotherapists)                                                                                             | 5, 6                         |

|                      |     |                                                                                                                                                                                                                                                                                                                                                                                |           |
|----------------------|-----|--------------------------------------------------------------------------------------------------------------------------------------------------------------------------------------------------------------------------------------------------------------------------------------------------------------------------------------------------------------------------------|-----------|
| Interventions        | 11a | Interventions for each group with sufficient detail to allow replication, including how and when they will be administered                                                                                                                                                                                                                                                     | 5-22      |
|                      | 11b | Criteria for discontinuing or modifying allocated interventions for a given trial participant (eg, drug dose change in response to harms, participant request, or improving/worsening disease)                                                                                                                                                                                 | 14, 21    |
|                      | 11c | Strategies to improve adherence to intervention protocols, and any procedures for monitoring adherence (eg, drug tablet return, laboratory tests)                                                                                                                                                                                                                              | 12, 14    |
|                      | 11d | Relevant concomitant care and interventions that are permitted or prohibited during the trial                                                                                                                                                                                                                                                                                  | 14        |
| Outcomes             | 12  | Primary, secondary, and other outcomes, including the specific measurement variable (eg, systolic blood pressure), analysis metric (eg, change from baseline, final value, time to event), method of aggregation (eg, median, proportion), and time point for each outcome. Explanation of the clinical relevance of chosen efficacy and harm outcomes is strongly recommended | 23        |
| Participant timeline | 13  | Time schedule of enrolment, interventions (including any run-ins and washouts), assessments, and visits for participants. A schematic diagram is highly recommended (see Figure)                                                                                                                                                                                               | 5, 24, 27 |
| Sample size          | 14  | Estimated number of participants needed to achieve study objectives and how it was determined, including clinical and statistical assumptions supporting any sample size calculations                                                                                                                                                                                          | 25        |
| Recruitment          | 15  | Strategies for achieving adequate participant enrolment to reach target sample size                                                                                                                                                                                                                                                                                            | 4         |

#### Methods: Assignment of interventions (for controlled trials)

##### Allocation:

|                                  |     |                                                                                                                                                                                                                                                                                                                                                          |    |
|----------------------------------|-----|----------------------------------------------------------------------------------------------------------------------------------------------------------------------------------------------------------------------------------------------------------------------------------------------------------------------------------------------------------|----|
| Sequence generation              | 16a | Method of generating the allocation sequence (eg, computer-generated random numbers), and list of any factors for stratification. To reduce predictability of a random sequence, details of any planned restriction (eg, blocking) should be provided in a separate document that is unavailable to those who enrol participants or assign interventions | 27 |
| Allocation concealment mechanism | 16b | Mechanism of implementing the allocation sequence (eg, central telephone; sequentially numbered, opaque, sealed envelopes), describing any steps to conceal the sequence until interventions are assigned                                                                                                                                                | 27 |
| Implementation                   | 16c | Who will generate the allocation sequence, who will enrol participants, and who will assign participants to interventions                                                                                                                                                                                                                                | 27 |
| Blinding (masking)               | 17a | Who will be blinded after assignment to interventions (eg, trial participants, care providers, outcome assessors, data analysts), and how                                                                                                                                                                                                                | 28 |
|                                  | 17b | If blinded, circumstances under which unblinding is permissible, and procedure for revealing a participant's allocated intervention during the trial                                                                                                                                                                                                     | 21 |

#### Methods: Data collection, management, and analysis

|    |                                 |     |                                                                                                                                                                                                                                                                                                                                                                                                              |        |
|----|---------------------------------|-----|--------------------------------------------------------------------------------------------------------------------------------------------------------------------------------------------------------------------------------------------------------------------------------------------------------------------------------------------------------------------------------------------------------------|--------|
| 1  |                                 |     |                                                                                                                                                                                                                                                                                                                                                                                                              |        |
| 2  | Data collection methods         | 18a | Plans for assessment and collection of outcome, baseline, and other trial data, including any related processes to promote data quality (eg, duplicate measurements, training of assessors) and a description of study instruments (eg, questionnaires, laboratory tests) along with their reliability and validity, if known. Reference to where data collection forms can be found, if not in the protocol | 24     |
| 3  |                                 |     |                                                                                                                                                                                                                                                                                                                                                                                                              |        |
| 4  |                                 |     |                                                                                                                                                                                                                                                                                                                                                                                                              |        |
| 5  |                                 |     |                                                                                                                                                                                                                                                                                                                                                                                                              |        |
| 6  |                                 |     |                                                                                                                                                                                                                                                                                                                                                                                                              |        |
| 7  |                                 |     |                                                                                                                                                                                                                                                                                                                                                                                                              |        |
| 8  |                                 | 18b | Plans to promote participant retention and complete follow-up, including list of any outcome data to be collected for participants who discontinue or deviate from intervention protocols                                                                                                                                                                                                                    | 22     |
| 9  |                                 |     |                                                                                                                                                                                                                                                                                                                                                                                                              |        |
| 10 |                                 |     |                                                                                                                                                                                                                                                                                                                                                                                                              |        |
| 11 | Data management                 | 19  | Plans for data entry, coding, security, and storage, including any related processes to promote data quality (eg, double data entry; range checks for data values). Reference to where details of data management procedures can be found, if not in the protocol                                                                                                                                            | 31     |
| 12 |                                 |     |                                                                                                                                                                                                                                                                                                                                                                                                              |        |
| 13 |                                 |     |                                                                                                                                                                                                                                                                                                                                                                                                              |        |
| 14 |                                 |     |                                                                                                                                                                                                                                                                                                                                                                                                              |        |
| 15 |                                 |     |                                                                                                                                                                                                                                                                                                                                                                                                              |        |
| 16 | Statistical methods             | 20a | Statistical methods for analysing primary and secondary outcomes. Reference to where other details of the statistical analysis plan can be found, if not in the protocol                                                                                                                                                                                                                                     | 28     |
| 17 |                                 |     |                                                                                                                                                                                                                                                                                                                                                                                                              |        |
| 18 |                                 |     |                                                                                                                                                                                                                                                                                                                                                                                                              |        |
| 19 |                                 | 20b | Methods for any additional analyses (eg, subgroup and adjusted analyses)                                                                                                                                                                                                                                                                                                                                     | N/A    |
| 20 |                                 |     |                                                                                                                                                                                                                                                                                                                                                                                                              |        |
| 21 |                                 | 20c | Definition of analysis population relating to protocol non-adherence (eg, as randomised analysis), and any statistical methods to handle missing data (eg, multiple imputation)                                                                                                                                                                                                                              | N/A    |
| 22 |                                 |     |                                                                                                                                                                                                                                                                                                                                                                                                              |        |
| 23 |                                 |     |                                                                                                                                                                                                                                                                                                                                                                                                              |        |
| 24 | <b>Methods: Monitoring</b>      |     |                                                                                                                                                                                                                                                                                                                                                                                                              |        |
| 25 |                                 |     |                                                                                                                                                                                                                                                                                                                                                                                                              |        |
| 26 | Data monitoring                 | 21a | Composition of data monitoring committee (DMC); summary of its role and reporting structure; statement of whether it is independent from the sponsor and competing interests; and reference to where further details about its charter can be found, if not in the protocol. Alternatively, an explanation of why a DMC is not needed                                                                        | 31     |
| 27 |                                 |     |                                                                                                                                                                                                                                                                                                                                                                                                              |        |
| 28 |                                 |     |                                                                                                                                                                                                                                                                                                                                                                                                              |        |
| 29 |                                 |     |                                                                                                                                                                                                                                                                                                                                                                                                              |        |
| 30 |                                 |     |                                                                                                                                                                                                                                                                                                                                                                                                              |        |
| 31 |                                 | 21b | Description of any interim analyses and stopping guidelines, including who will have access to these interim results and make the final decision to terminate the trial                                                                                                                                                                                                                                      | N/A    |
| 32 |                                 |     |                                                                                                                                                                                                                                                                                                                                                                                                              |        |
| 33 |                                 |     |                                                                                                                                                                                                                                                                                                                                                                                                              |        |
| 34 | Harms                           | 22  | Plans for collecting, assessing, reporting, and managing solicited and spontaneously reported adverse events and other unintended effects of trial interventions or trial conduct                                                                                                                                                                                                                            | 21, 31 |
| 35 |                                 |     |                                                                                                                                                                                                                                                                                                                                                                                                              |        |
| 36 |                                 |     |                                                                                                                                                                                                                                                                                                                                                                                                              |        |
| 37 |                                 |     |                                                                                                                                                                                                                                                                                                                                                                                                              |        |
| 38 | Auditing                        | 23  | Frequency and procedures for auditing trial conduct, if any, and whether the process will be independent from investigators and the sponsor                                                                                                                                                                                                                                                                  | N/A    |
| 39 |                                 |     |                                                                                                                                                                                                                                                                                                                                                                                                              |        |
| 40 |                                 |     |                                                                                                                                                                                                                                                                                                                                                                                                              |        |
| 41 | <b>Ethics and dissemination</b> |     |                                                                                                                                                                                                                                                                                                                                                                                                              |        |
| 42 |                                 |     |                                                                                                                                                                                                                                                                                                                                                                                                              |        |
| 43 | Research ethics approval        | 24  | Plans for seeking research ethics committee/institutional review board (REC/IRB) approval                                                                                                                                                                                                                                                                                                                    | 5      |
| 44 |                                 |     |                                                                                                                                                                                                                                                                                                                                                                                                              |        |
| 45 | Protocol amendments             | 25  | Plans for communicating important protocol modifications (eg, changes to eligibility criteria, outcomes, analyses) to relevant parties (eg, investigators, REC/IRBs, trial participants, trial registries, journals, regulators)                                                                                                                                                                             | 5      |
| 46 |                                 |     |                                                                                                                                                                                                                                                                                                                                                                                                              |        |
| 47 |                                 |     |                                                                                                                                                                                                                                                                                                                                                                                                              |        |
| 48 |                                 |     |                                                                                                                                                                                                                                                                                                                                                                                                              |        |
| 49 | Consent or assent               | 26a | Who will obtain informed consent or assent from potential trial participants or authorised surrogates, and how (see Item 32)                                                                                                                                                                                                                                                                                 | 5      |
| 50 |                                 |     |                                                                                                                                                                                                                                                                                                                                                                                                              |        |
| 51 |                                 |     |                                                                                                                                                                                                                                                                                                                                                                                                              |        |
| 52 |                                 | 26b | Additional consent provisions for collection and use of participant data and biological specimens in ancillary studies, if applicable                                                                                                                                                                                                                                                                        | 32     |
| 53 |                                 |     |                                                                                                                                                                                                                                                                                                                                                                                                              |        |
| 54 |                                 |     |                                                                                                                                                                                                                                                                                                                                                                                                              |        |
| 55 | Confidentiality                 | 27  | How personal information about potential and enrolled participants will be collected, shared, and maintained in order to protect confidentiality before, during, and after the trial                                                                                                                                                                                                                         | 31     |
| 56 |                                 |     |                                                                                                                                                                                                                                                                                                                                                                                                              |        |
| 57 |                                 |     |                                                                                                                                                                                                                                                                                                                                                                                                              |        |
| 58 |                                 |     |                                                                                                                                                                                                                                                                                                                                                                                                              |        |
| 59 |                                 |     |                                                                                                                                                                                                                                                                                                                                                                                                              |        |
| 60 |                                 |     |                                                                                                                                                                                                                                                                                                                                                                                                              |        |

|    |                               |     |                                                                                                                                                                                                                                                                                     |     |
|----|-------------------------------|-----|-------------------------------------------------------------------------------------------------------------------------------------------------------------------------------------------------------------------------------------------------------------------------------------|-----|
| 1  |                               |     |                                                                                                                                                                                                                                                                                     |     |
| 2  | Declaration of interests      | 28  | Financial and other competing interests for principal investigators for the overall trial and each study site                                                                                                                                                                       | 33  |
| 3  |                               |     |                                                                                                                                                                                                                                                                                     |     |
| 4  | Access to data                | 29  | Statement of who will have access to the final trial dataset, and disclosure of contractual agreements that limit such access for investigators                                                                                                                                     | 31  |
| 5  |                               |     |                                                                                                                                                                                                                                                                                     |     |
| 6  | Ancillary and post-trial care | 30  | Provisions, if any, for ancillary and post-trial care, and for compensation to those who suffer harm from trial participation                                                                                                                                                       | N/A |
| 7  |                               |     |                                                                                                                                                                                                                                                                                     |     |
| 8  | Dissemination policy          | 31a | Plans for investigators and sponsor to communicate trial results to participants, healthcare professionals, the public, and other relevant groups (eg, via publication, reporting in results databases, or other data sharing arrangements), including any publication restrictions | 31  |
| 9  |                               |     |                                                                                                                                                                                                                                                                                     |     |
| 10 |                               | 31b | Authorship eligibility guidelines and any intended use of professional writers                                                                                                                                                                                                      | 31  |
| 11 |                               |     |                                                                                                                                                                                                                                                                                     |     |
| 12 |                               | 31c | Plans, if any, for granting public access to the full protocol, participant-level dataset, and statistical code                                                                                                                                                                     | N/A |
| 13 |                               |     |                                                                                                                                                                                                                                                                                     |     |
| 14 |                               |     |                                                                                                                                                                                                                                                                                     |     |
| 15 |                               |     |                                                                                                                                                                                                                                                                                     |     |
| 16 |                               |     |                                                                                                                                                                                                                                                                                     |     |
| 17 |                               |     |                                                                                                                                                                                                                                                                                     |     |
| 18 |                               |     |                                                                                                                                                                                                                                                                                     |     |
| 19 |                               |     |                                                                                                                                                                                                                                                                                     |     |
| 20 | <b>Appendices</b>             |     |                                                                                                                                                                                                                                                                                     |     |
| 21 |                               |     |                                                                                                                                                                                                                                                                                     |     |
| 22 | Informed consent materials    | 32  | Model consent form and other related documentation given to participants and authorised surrogates                                                                                                                                                                                  | N/A |
| 23 |                               |     |                                                                                                                                                                                                                                                                                     |     |
| 24 |                               |     |                                                                                                                                                                                                                                                                                     |     |
| 25 | Biological specimens          | 33  | Plans for collection, laboratory evaluation, and storage of biological specimens for genetic or molecular analysis in the current trial and for future use in ancillary studies, if applicable                                                                                      | 32  |
| 26 |                               |     |                                                                                                                                                                                                                                                                                     |     |
| 27 |                               |     |                                                                                                                                                                                                                                                                                     |     |

\*It is strongly recommended that this checklist be read in conjunction with the SPIRIT 2013 Explanation & Elaboration for important clarification on the items. Amendments to the protocol should be tracked and dated. The SPIRIT checklist is copyrighted by the SPIRIT Group under the Creative Commons "[Attribution-NonCommercial-NoDerivs 3.0 Unported](https://creativecommons.org/licenses/by-nc-nd/3.0/)" license.

# BMJ Open

## The long-term effect of smartphone-delivered Interval Walking Training on physical activity in patients with type 2 diabetes: protocol for a parallel group single-blinded randomized controlled trial



|                                 |                                                                                                                                                                                                                                                                                                                                                                                                                                                                                                                                                                                                                                                                                                                                                                                                                                                                                                                                                                                                                                                                                                                                                                                                                                                                                                       |
|---------------------------------|-------------------------------------------------------------------------------------------------------------------------------------------------------------------------------------------------------------------------------------------------------------------------------------------------------------------------------------------------------------------------------------------------------------------------------------------------------------------------------------------------------------------------------------------------------------------------------------------------------------------------------------------------------------------------------------------------------------------------------------------------------------------------------------------------------------------------------------------------------------------------------------------------------------------------------------------------------------------------------------------------------------------------------------------------------------------------------------------------------------------------------------------------------------------------------------------------------------------------------------------------------------------------------------------------------|
| Journal:                        | <i>BMJ Open</i>                                                                                                                                                                                                                                                                                                                                                                                                                                                                                                                                                                                                                                                                                                                                                                                                                                                                                                                                                                                                                                                                                                                                                                                                                                                                                       |
| Manuscript ID                   | bmjopen-2016-014036.R1                                                                                                                                                                                                                                                                                                                                                                                                                                                                                                                                                                                                                                                                                                                                                                                                                                                                                                                                                                                                                                                                                                                                                                                                                                                                                |
| Article Type:                   | Protocol                                                                                                                                                                                                                                                                                                                                                                                                                                                                                                                                                                                                                                                                                                                                                                                                                                                                                                                                                                                                                                                                                                                                                                                                                                                                                              |
| Date Submitted by the Author:   | 12-Jan-2017                                                                                                                                                                                                                                                                                                                                                                                                                                                                                                                                                                                                                                                                                                                                                                                                                                                                                                                                                                                                                                                                                                                                                                                                                                                                                           |
| Complete List of Authors:       | <p>Valentiner, Laura; University of Copenhagen, CopenRehab, Department of Public Health, Section of Social Medicine, Henrik Pontoppidans Vej 6; Copenhagen University Hospital, Center for Physical Activity Research, Blegdamsvej 9, DK-2100</p> <p>Ried-Larsen, Mathias; Copenhagen University Hospital, Center for Physical Activity Research</p> <p>Karstoft, Kristian; Copenhagen University Hospital, Center for Physical Activity Research; Rigshospitalet, University of Copenhagen, Brinkløv, Cecilie; Copenhagen University Hospital, Center for Physical Activity Research Blegdamsvej 9 Copenhagen, DK 2100</p> <p>Brøns, Charlotte; Copenhagen University Hospital, Center for Physical Activity Research</p> <p>Nielsen, Rasmus; Copenhagen University Hospital, Center for Physical Activity Research</p> <p>Christensen, Robin; Frederiksberg and Bispebjerg Hospital, Parker Institute</p> <p>Nielsen, Jens; Department of Endocrinology (Diabetes and Metabolism), Rigshospitalet, University of Copenhagen</p> <p>Vaag, Allan</p> <p>Pedersen, Bente; Copenhagen University Hospital, Center for Physical Activity Research</p> <p>Langberg, Henning; CopenRehab, Department of Public Health, Section of Social Medicine, Henrik Pontoppidans Vej 6, University of Copenhagen</p> |
| <b>Primary Subject Heading</b>: | Diabetes and endocrinology                                                                                                                                                                                                                                                                                                                                                                                                                                                                                                                                                                                                                                                                                                                                                                                                                                                                                                                                                                                                                                                                                                                                                                                                                                                                            |
| Secondary Subject Heading:      | Diabetes and endocrinology, Sports and exercise medicine, Rehabilitation medicine, Evidence based practice                                                                                                                                                                                                                                                                                                                                                                                                                                                                                                                                                                                                                                                                                                                                                                                                                                                                                                                                                                                                                                                                                                                                                                                            |
| Keywords:                       | Type 2 diabetes, Rehabilitation, Interval Walking Training, Physical Activity, Behaviour maintenance                                                                                                                                                                                                                                                                                                                                                                                                                                                                                                                                                                                                                                                                                                                                                                                                                                                                                                                                                                                                                                                                                                                                                                                                  |
|                                 |                                                                                                                                                                                                                                                                                                                                                                                                                                                                                                                                                                                                                                                                                                                                                                                                                                                                                                                                                                                                                                                                                                                                                                                                                                                                                                       |

SCHOLARONE™  
Manuscripts

**TITLE:**

The long-term effect of smartphone-delivered Interval Walking Training on physical activity in patients with type 2 diabetes: protocol for a parallel group single-blinded randomized controlled trial

**CORRESPONDING AUTHOR:**

Laura Staun Valentiner, Department of Public Health, Section of Social Medicine, CopenRehab, University of Copenhagen, Henrik Pontoppidans Vej 6, 2200 Copenhagen, Denmark

Phone: +45 51173649

Email: [lava@sund.ku.dk](mailto:lava@sund.ku.dk)

**RUNNING HEAD**

Effect of Interval Walking on Type 2 Diabetics

**BRIEF TITLE:**

The InterWalk Trial

**AUTHORS:**

Laura Staun Valentiner<sup>1,2</sup> ([lava@sund.ku.dk](mailto:lava@sund.ku.dk))

## Effect of Interval walking on type 2 diabetics

BMJ Open

Mathias Ried-Larsen<sup>2,3,4</sup> ([mathias.ried-larsen@regionh.dk](mailto:mathias.ried-larsen@regionh.dk))

Kristian Karstoft<sup>2,4</sup> ([kristian.karstoft@regionh.dk](mailto:kristian.karstoft@regionh.dk))

Cecilie Fau Brinkløv<sup>2,4</sup> ([cecilie.fau.brinkloev@regionh.dk](mailto:cecilie.fau.brinkloev@regionh.dk))

Charlotte Brøns<sup>2,7</sup> ([charlotte.broens@regionh.dk](mailto:charlotte.broens@regionh.dk))

Rasmus Oestergaard Nielsen<sup>1,2</sup> ([roen@ph.au.dk](mailto:roen@ph.au.dk))

Robin Christensen<sup>5</sup> ([robin.christensen@regionh.dk](mailto:robin.christensen@regionh.dk))

Jens Steen Nielsen<sup>6,8</sup> ([jsn@rsyd.dk](mailto:jsn@rsyd.dk))

Allan Arthur Vaag<sup>2,3,4</sup> ([allan.vaag@astrazeneca.com](mailto:allan.vaag@astrazeneca.com))

Bente Klarlund Pedersen<sup>2,4</sup> ([bente.klarlund.pedersen@regionh.dk](mailto:bente.klarlund.pedersen@regionh.dk))

Henning Langberg<sup>1,2</sup> ([langberg@sund.ku.dk](mailto:langberg@sund.ku.dk))

1. CopenRehab, Department of Public Health, Section of Social Medicine, Henrik Pontoppidans Vej 6, University of Copenhagen, 2200 Copenhagen, Denmark
2. Center for Physical Activity Research, Department of Infectious Diseases, Rigshospitalet, University of Copenhagen, Blegdamsvej 9, 2100 Copenhagen, Denmark
3. The Danish Diabetes Academy, Odense University Hospital, Sdr. Boulevard 29, Entrance 112, 3rd floor, 5000 Odense, Denmark
4. Centre of Inflammation and Metabolism, Department of Infectious Diseases, Rigshospitalet, University of Copenhagen, Blegdamsvej 9, 2100 Copenhagen, Denmark



5. Musculoskeletal Statistics Unit, The Parker Institute, Bispebjerg and Frederiksberg Hospital, The Capital Region of Denmark, Denmark
6. Department of Endocrinology, Odense University Hospital, Sdr. Boulevard 29, Entrance 112, 3rd floor, 5000 Odense, Denmark
7. Department of Endocrinology (Diabetes and Metabolism), Rigshospitalet, University of Copenhagen, Denmark
8. OPEN, Odense Patient data Explorative Network, Odense University Hospital, Odense, Denmark.

**TOTAL NUMBER OF WORDS:**

6785

**ABSTRACT:****Introduction**

Physical activity is a cornerstone in Type 2 diabetes (T2D) rehabilitation. Effective long-term and low-cost strategies to keep these patients' physically active are needed. However, maintaining physical activity behaviour is difficult once formalised interventions end. Structured exercise training supported by mobile technology and remote feedback is potentially an effective strategy.

The objective of the trial is to investigate whether mobile health support using the InterWalk application for smartphones is effective in increasing physical activity levels in persons with T2D over time compared to standard care.

We investigate whether Interval Walking Training (IWT) using the InterWalk application is superior to Danish municipality-based rehabilitation in increasing moderate-and-vigorous physical activity levels in patients with T2D across 52 weeks. Secondary, we hypothesize that a motivational programme added from end of intervention to 52-weeks further increases level of physical activity in everyday life in patients with T2D.

**Methods and analysis**

The trial is a parallel-group, open-labelled, randomised controlled trial with long-term follow-up at 52-week including patients with T2D. The primary outcome is change in moderate-and-vigorous physical activity. The key secondary outcome includes motivation for physical activity behaviour change. Other secondary outcomes are  $VO_2$ -peak, strength in

1  
2  
3  
4  
5  
6  
7  
8  
9 the lower extremities. Exclusion criterion is medical contraindication to exercise. We  
10 include up to 246 patients and randomly allocate them into a control (standard group) or an  
11 experimental group (8-12 weeks of IWT supported by the smartphone-based InterWalk  
12 application) in a 1:2 fashion. After intervention, the experimental group is randomly  
13 allocated into two follow-up conditions with unsupervised IWT with or without motivational  
14 support until 52-week follow-up. The Intention-To-Treat principle is applied.  
15  
16  
17  
18  
19  
20  
21

### 22 **Ethics and Dissemination**

23  
24 The local regional Research Ethics Committee in Denmark (H-1-2014-074) and the Danish  
25 Data Protection Agency (j.nr. 2014-54-0897) have approved the trial. Positive, negative or  
26 inconclusive results will be disseminated in scientific journals and conferences.  
27  
28  
29  
30

31 **Trial registration:** NCT02341690

32  
33 **Keywords:** Type 2 diabetes, Rehabilitation, Interval Walking Training, Physical activity,  
34 Behaviour maintenance  
35  
36  
37  
38  
39

### 40 **STRENGTHS:**

- 41 ○ The trial is the largest of its kind, and meets the criteria for high quality randomized  
42 controlled trials with central randomization and use of valid and reliable measures.  
43
- 44 ○ The efficiency of Interval Walking Training on e.g. glycaemic control has  
45 previously been demonstrated.  
46
- 47 ○ The trial has a long-term follow-up period of 52-weeks from baseline.  
48  
49  
50  
51  
52  
53  
54  
55  
56  
57  
58  
59  
60

## Effect of Interval walking on type 2 diabetics

BMJ Open

- The trial has high external validity with relevance for the clinical setting as it is performed within clinical practice and includes a limited use of inclusion/exclusion criteria's.

**LIMITS:**

- The trial has several collaborators in the setup which may cause variation in the testing procedures.
- Lack of clinical endpoints e.g. depression and mental health
- The length of the intervention periods varies between the three collaborating municipalities may influence the results of the trial.
- There may be a risk of contamination in the control group as the InterWalk application can be downloaded in App Store.

## INTRODUCTION

Physical activity (PA) is a cornerstone in the clinical care of patients with type 2 diabetes (T2D).[1] PA activity has beneficial effect on glycaemic control and other key metabolic risk factors [2,3], as well as improvements in quality of life.[4,5] Furthermore, supervised long-term PA interventions have proven effective in improving glycaemic control.[2,6] However, experimental evidence does not support the efficiency of advice about physical activity alone.[7] As the number of patients with T2D is estimated to rise to 500 million by 2030 worldwide [8,9] the implementation of structured, long-term and supervised exercise regimes constitutes a large societal challenge and is not feasible. Thus, novel strategies to increase physical activity among patients with T2D are needed.

Smartphones have been used as a tool to register exercise, diet, weight and plasma glucose levels, but the evidence for using a smartphone as an exercise device and a self-management tool in the diabetes care is lacking.[10] However, emerging evidence suggest that eHealth solutions using information and communication technologies [11] can educate and engage patients with T2D in long-term self-management.[12–14] Due to the large ingress and ownership of smartphones, a smartphone-supported approach could prove feasible in increasing physical activity among patients with T2D and accommodate the increasing prevalence of T2D.

Efficiency of Interval Walking Training (IWT) in patients with T2D has been established.[15] In the study by Karstoft and co-workers, IWT was administered and

1  
2  
3  
4  
5  
6  
7  
8  
9 monitored using a small exercise computer (JD-mate). IWT induced significant improvements  
10 in physical fitness level, body composition and glycaemic control and in adherence of more  
11 than 85% over a 16 weeks period.[15] The potential benefits of implementing eHealth  
12 solutions in T2D management and the apparent health benefits of and adherence to IWT gave  
13 rise to the development of the InterWalk application (InterWalk app) to deliver IWT.[16]  
14  
15  
16  
17  
18

19  
20 There is a lack of knowledge about the integration of PA in the everyday life  
21 of the patient following rehabilitation interventions.[17] It is, however, known that  
22 successful behavioural change depends on an on-going maintenance of individual  
23 motivation regarding the behaviour and behavioural change itself.[18] Furthermore, time  
24 since onset of diagnosis, unhealthy behaviour and own beliefs about the cause of the  
25 problem, together with the number of previous attempts to change and support from  
26 partners, peers and health professionals are of relevance.[18] This underlines the need for  
27 new interventions with a direct focus on motivational support and self-control regarding  
28 sustaining a newly acquired behavioural change with PA. To better target and structure  
29 manageable interventions related to patients with T2D, understanding patients' individual  
30 priorities and values are crucial. In this regard, knowledge of individual motivation and self-  
31 efficacy to initiate behavioural changes becomes essential to understand.[18]  
32  
33  
34  
35  
36  
37  
38  
39  
40  
41  
42  
43  
44  
45

46 This paper presents a detailed protocol for the InterWalk Randomised  
47 Controlled Trial and is described in accordance with the SPIRIT guidelines (Standard  
48 Protocol Items: Recommendations for Interventional Trials).[19] Results from the trial will  
49  
50  
51  
52  
53  
54  
55  
56  
57  
58  
59  
60

1  
2  
3  
4  
5  
6  
7  
8 follow CONSORT guidelines (CONsolidated Standards Of Reporting Trials) for non-  
9 pharmacological interventions.[20]  
10  
11  
12

### 13 14 15 **Trial objective and hypothesis** 16

17 The objective of the trial is to investigate whether mobile support using the InterWalk  
18 application for smartphones is effective in increasing physical activity levels in persons with  
19 type 2 diabetes over time compared with a standard care rehabilitation program.  
20  
21  
22

23 We investigate the effectiveness of the implementation of Interval Walking Training using the  
24 InterWalk application in the Danish municipality-based rehabilitation program and study  
25 whether the Interval Walking Training is superior to standard care in increasing moderate-  
26 vigorous physical activity 52 after weeks. Furthermore, we expect that a motivational support  
27 program added from end of the intervention to 52-weeks, will increase the physical activity  
28 level in patients with type 2 diabetes and help maintaining a physically active everyday life  
29 long-term.  
30  
31  
32  
33  
34  
35  
36  
37  
38  
39  
40  
41

### 42 **METHODS AND ANALYSIS** 43

#### 44 ***Trial design and setting*** 45

46 The trial is a 52-week parallel-arm, open-labelled, randomised controlled trial. The  
47 participants are randomly allocated into two groups, 1) standard care or 2) experimental  
48 group with moderate-and-vigorous physical activity level, doing interval walking  
49  
50  
51  
52  
53  
54  
55  
56  
57  
58  
59  
60

## Effect of Interval walking on type 2 diabetics

BMJ Open

1  
2  
3  
4  
5  
6  
7  
8  
9  
10  
11  
12  
13  
14  
15  
16  
17  
18  
19  
20  
21  
22  
23  
24  
25  
26  
27  
28  
29  
30  
31  
32  
33  
34  
35  
36  
37  
38  
39  
40  
41  
42  
43  
44  
45  
46  
47  
48  
49  
50  
51  
52  
53  
54  
55  
56  
57  
58  
59  
60

facilitated by the InterWalk app. After an 8-12-week intervention period, patients in the experimental group are allocated to do interval walking using the InterWalk app with or without motivational support provided by the health professionals (see Figure 1).

[INSERT FIGURE 1 ABOUT HERE]

The intervention is conducted at the health promotion centres in Danish municipalities and hospitals that consecutively are included as cooperation partners. The municipality of Copenhagen is the first collaborator in the trial. Patients are referred to rehabilitation by their general practitioner (GP). Trained health professionals (physical therapists, nurses and staff with a master's degree) working at the health promotion centres recruit the patients, deliver the interventions and conduct all testing. The overall organization of health care in Denmark is fully tax-financed with universal access to health care services. The Danish model is described in detail elsewhere [21,22] and chronic disease care (including T2D) management is in Denmark based in the Chronic Care Model.[23]

Briefly, GPs refer patients diagnosed with T2D to rehabilitation at either an out-patient clinic, within a municipality or at the hospital level in Denmark. The setting depends on stage of the disease, presence of complications and co-morbidities e.g. severe heart conditions, depression or mental illness. The municipality based rehabilitation primarily includes non-complicated patients (~80% of all patients).[21] If complications or



1  
2  
3  
4  
5  
6  
7  
8  
9 co-morbidities are present, patients are referred to treatment at a specialized clinic at a  
10 hospital. Patients with a non-complicated course of disease receive rehabilitation  
11 consisting of: 1) disease-specific patient education, 2) diet counseling, 3) smoking  
12 cessation and 4) exercise. The composition of the individual rehabilitation program  
13 depends however on disease progression and on the rehabilitation offered in the  
14 municipality-based program or at the hospital. The general focus is patient empowerment,  
15 disease-related self-care and prevention of a decay of the functional capacity of patients  
16 with T2D.  
17  
18  
19  
20  
21  
22  
23  
24  
25

26 The Scientific Ethical Committee at the Capital Region of Denmark (H-1-  
27 2014-074), and the Danish Data Protection Agency (j.nr. 2014-54-0897) have approved the  
28 trial. The InterWalk application is approved by the Danish Data Protection Agency (2008-  
29 58-0035). The trial has been registered at <http://www.clinicaltrials.org> (NCT02341690) on  
30 January 9<sup>th</sup>, 2015. Amendments to the protocol will be approved by the Scientific Ethical  
31 Committee at the Capital Region of Denmark. Amendments will be reported to  
32 <http://www.clinicaltrials.org>. The trial is conducted in accordance with the Helsinki  
33 Declaration.  
34  
35  
36  
37  
38  
39  
40  
41  
42  
43  
44  
45

## 46 **Participants**

### 47 *Eligibility*

48  
49  
50  
51  
52  
53  
54  
55  
56  
57  
58  
59  
60

All non-complicated patients diagnosed with T2D (out-patients), referred to a health promotion centre or hospital in the participating municipalities by their GP, are eligible if more than 18 years of age. A flow chart of participants is presented in Figure 2.

[INSERT FIGURE 2 ABOUT HERE]

The exclusion criteria are medical contraindications to exercise e.g. chronic complications in the locomotive apparatus, painful osteoarthritis or heart conditions.[24] Information is collected through medical records and at a screening interview with a health professional at the health promotion centre. Furthermore, patients are excluded if they do not want to be physically active in the rehabilitation setting or are already participating in other intervention studies at a health promotion centre. The patients have to be able to talk, read and understand the Danish language (for overview over in- and exclusion criterion, see Table 1).

---

**Table 1. ELIGIBILITY CRITERIA**

---

**Inclusion criteria**

- Diagnosed with type 2 diabetes
- Referred by General practitioner to a health promoting centre in participating municipality or hospital

**Exclusion criteria**

- < 18 years of age
  - Medical contraindications to exercise
  - Already participating in other exercise trials
  - Does not talk and read Danish
-

1  
2  
3  
4  
5  
6  
7  
8  
9  
10  
11  
12  
13  
14  
15  
16  
17  
18  
19  
20  
21  
22  
23  
24  
25  
26  
27  
28  
29  
30  
31  
32  
33  
34  
35  
36  
37  
38  
39  
40  
41  
42  
43  
44  
45  
46  
47  
48  
49  
50  
51  
52  
53  
54  
55  
56  
57  
58  
59  
60

If eligible, health professionals give oral and formalized written information with two days to consider participation in the trial. Written informed consent is obtained before any additional trial procedures. Enrolment was initiated in January 2015 and recruitment is terminated on December 15<sup>th</sup> 2016. Last-patient-last-visit is expected in December 2017.

### **Interventions**

The trial is developed in collaboration with the health professionals from the municipality of Copenhagen in Denmark. The interventions are designed to reflect the clinical rehabilitation settings in Denmark in order to increase the likelihood of implementation of the programme following this trial, if proven superior. Health professionals from the municipalities already providing the rehabilitation delivers all interventions in both the control and experimental groups during the trial period. The investigators (LSV, CB and HL) led four workshops (16 hours in total) with the health professionals during year 2014, in which the interventions of the study and work routines were discussed in detail. Furthermore, all participating health professionals underwent a thorough education program (15 hours in total) involving all procedures and manuals in the trial. This was done to ensure standardization of all procedures throughout the trial. In addition, workshops were held from the start of the trial (January 2014) and hereafter every second month. This is done to secure that the health professionals follow all procedures and prepared manuals throughout the trial. The applicability of the trial results is hereby

1  
2  
3  
4  
5  
6  
7  
8  
9 increased, as the interventions are already part of the rehabilitation programme offered to  
10 patients with T2D in the municipalities.  
11

12  
13 The interventions in the trial consist of two phases (Figure 1). In phase one (8-  
14 12 weeks), patients are randomised to either a standard care group (control intervention) or  
15 an experimental group doing IWT using the InterWalk app. The present trial uses the  
16 standard care programme as control intervention and is conducted directly in the clinical  
17 setting. All patients receive supervision across phase one. In phase two (40-44 weeks),  
18 patients in the standard care group have no follow-up until 52 weeks post baseline. Patients  
19 in the experimental intervention group are in phase two randomly allocated to either IWT  
20 with or without motivational support (see section Experimental intervention – Interval  
21 Walking with the InterWalk application). Additional rehabilitation care (co-interventions)  
22 with disease-specific patient education, diet counseling and smoking cessation is offered to  
23 all patients across the intervention groups. The interventions are summarized in Table 2.  
24  
25  
26  
27  
28  
29  
30  
31  
32  
33  
34  
35  
36  
37  
38  
39  
40  
41  
42  
43  
44  
45  
46  
47  
48  
49  
50  
51  
52  
53  
54  
55  
56  
57  
58  
59  
60

Effect of Interval walking on type 2 diabetics

BMJ Open

Table 2. INTERVENTIONS IN THE TRIAL DURING PHASE ONE AND TWO

| PHASE ONE                                                                               |                                                                                                                                                                                                                                                                                                                                                                                                                                                                                                                                                        |
|-----------------------------------------------------------------------------------------|--------------------------------------------------------------------------------------------------------------------------------------------------------------------------------------------------------------------------------------------------------------------------------------------------------------------------------------------------------------------------------------------------------------------------------------------------------------------------------------------------------------------------------------------------------|
| <b>STANDARD CARE (CONTROL INTERVENTION)</b>                                             |                                                                                                                                                                                                                                                                                                                                                                                                                                                                                                                                                        |
| <b>Group based training at the health promotion centre (Control intervention) (1/3)</b> | <ul style="list-style-type: none"> <li>• Group based sessions with 4-12 patients</li> <li>• Two sessions per week at the health promotion centre</li> <li>• Warm-up exercises</li> <li>• Cardio-respiratory exercises</li> <li>• Resistance training</li> <li>• Cool down period</li> </ul>                                                                                                                                                                                                                                                            |
| <b>EXPERIMENTAL INTERVENTION</b>                                                        |                                                                                                                                                                                                                                                                                                                                                                                                                                                                                                                                                        |
| <b>Interval Waling Training (IWT) (2/3)</b>                                             | <ul style="list-style-type: none"> <li>• Group based Interval Walking Training (IWT) using the InterWalk app</li> <li>• Introduction to the InterWalk app</li> <li>• Follow-up instructions and guidance</li> <li>• IWT using the InterWalk app</li> <li>• Three times per week, 60 minutes per session - twice a week at a health promotion centre in a group and one time alone in everyday life</li> <li>• End of phase one: preparation to continue IWT with IW app in the end of the intervention period, through a transition program</li> </ul> |
| PHASE TWO                                                                               |                                                                                                                                                                                                                                                                                                                                                                                                                                                                                                                                                        |
| <b>STANDARD CARE (CONTROL INTERVENTION)</b>                                             |                                                                                                                                                                                                                                                                                                                                                                                                                                                                                                                                                        |
| <b>Group based training at the health promotion centre (Control intervention) (1/3)</b> | <ul style="list-style-type: none"> <li>• No intervention at the health promotion centre</li> <li>• Follow-up at 52-week</li> </ul>                                                                                                                                                                                                                                                                                                                                                                                                                     |
| <b>EXPERIMENTAL INTERVENTION</b>                                                        |                                                                                                                                                                                                                                                                                                                                                                                                                                                                                                                                                        |
| <b>IWTgroup (1/3)</b>                                                                   | <ul style="list-style-type: none"> <li>• No intervention at the health promotion centre</li> <li>• Follow-up at 52-weeks</li> </ul>                                                                                                                                                                                                                                                                                                                                                                                                                    |

Effect of Interval walking on type 2 diabetics

BMJ Open

1  
2  
3  
4  
5  
6  
7  
8  
9  
10  
11  
12  
13  
14  
15  
16  
17  
18  
19  
20  
21  
22  
23  
24  
25  
26  
27  
28  
29  
30  
31  
32  
33  
34  
35  
36  
37  
38  
39  
40  
41  
42  
43  
44  
45  
46  
47  
48  
49

|                                                           |                                                                                                                                                                                                                                                                                                                                 |                                                                                                                                                                                                                                                                                                                                                                                                                                                                                                                                                                                                                                                                                                                                                                                                                                                                                                                                                                      |
|-----------------------------------------------------------|---------------------------------------------------------------------------------------------------------------------------------------------------------------------------------------------------------------------------------------------------------------------------------------------------------------------------------|----------------------------------------------------------------------------------------------------------------------------------------------------------------------------------------------------------------------------------------------------------------------------------------------------------------------------------------------------------------------------------------------------------------------------------------------------------------------------------------------------------------------------------------------------------------------------------------------------------------------------------------------------------------------------------------------------------------------------------------------------------------------------------------------------------------------------------------------------------------------------------------------------------------------------------------------------------------------|
|                                                           | <p><b>IWTsupport-group (1/3)</b><br/> <b>Motivational Support</b><br/> <b>1. Individual Motivational interviews with individual goal setting (semi-structured)</b><br/><br/> <b>2. Short Message Service (SMS)</b><br/> <i>One weekly SMS and one SMS every forth week</i><br/><br/> <b>3. Interval Walking Ambassadors</b></p> | <ul style="list-style-type: none"> <li>• Four semi-structured individual motivational interviews are scheduled in phase two: week 16, 20, 28, 40.</li> <li>• Each interview is scheduled to last 30 minutes</li> <li>• Individual goal setting related to everyday life following the SMART-principle.</li> <li>• The aim of goal setting is to help the patient reflect on their physical activity habits</li> <li>• Weekly SMS</li> <li>• The reply indicates amount of IWT during the past week (none, 1-2 or 3 or more)</li> <li>• If no reply for two consecutive weeks, or if the reply indicates none-walking, then the patient is contacted by phone by a health professional</li> <li>• SMS every forth week</li> <li>• Encourages the patient to make a new walking test using the InterWalk app</li> <li>• Educated patients with T2D do interval walking in local community near the health promotion centres</li> <li>• One session per week</li> </ul> |
| <p><b>Co-interventions (Across phase one and two)</b></p> | <p><b>ADDITIONAL REHABILITATION CARE (CO-INTERVENTIONS) WITH SPECIFIC FOCUS AREAS</b></p> <p><b>Patient education</b></p> <p><b>Diet counselling</b></p> <p><b>Smoking Cessation</b></p>                                                                                                                                        | <p>Disease related education regarding living with type 2 diabetes, empowerment and self-management and medication handled by either medical doctor, a nurse, physical therapist or dietitian and another patient with type 2 diabetes - group based or individually handled</p> <p>Diabetes specific diet counselling - group based or individually handled by a dietitian</p> <p>Smoking cessation courses is handled by smoking cessation counsellors The course lasts 10-12 hours and can be either individually or group based</p>                                                                                                                                                                                                                                                                                                                                                                                                                              |

1  
2  
3  
4  
5  
6  
7  
8  
9  
10  
11  
12  
13  
14  
15  
16  
17  
18  
19  
20  
21  
22  
23  
24  
25  
26  
27  
28  
29  
30  
31  
32  
33  
34  
35  
36  
37  
38  
39  
40  
41  
42  
43  
44  
45  
46  
47  
48  
49  
50  
51  
52  
53  
54  
55  
56  
57  
58  
59  
60

***Experimental intervention – Interval Walking Training with the InterWalk application***

Patients allocated to the experimental intervention do interval walking after baseline test provided by health professionals (phase one). IWT is provided by health professionals to smaller groups of 3-12 patients. After the intervention period in phase two patients are allocated to either receive IWT without motivational support during follow-up (IWTgroup) or IWT with motivational support during follow-up (IWTsupport-group) (Figure 1). Trained health professionals conduct the IWT sessions (see below) and the motivational support in phase two. Table 2 gives an example of a typical week with interval walking in the experimental intervention group.

***Interval Walking Training using The InterWalk Application***

Interval Walking Training is performed using the InterWalk app, which works as a personal trainer as well as a monitoring unit allowing researchers to continuously and automatically monitor and store the physical activity level in a central database (Figure 3).[16]

Interval Walking Training is personalized through a standardised eight-minute walking test, performed with the app before engaging in IWT.[25] The InterWalk app guides the user in IWT with repeated cycles of 3 minutes fast and 3 minutes slow walking. During Interval Walking Training (IWT) the InterWalk app provides the patient with continuous feedback on the walking speed. The patients are able to track exercise history and receive historic feedback on the quality of the IWT session using the app. The feedback system

1  
2  
3  
4  
5  
6  
7  
8  
9 employs the on-board accelerometer of the phone and GPS system to assess intensity and  
10 geographical location. Information on training intensity, total number of steps per day, IWT-  
11 data and data from the standardised walking test is stored in the smartphone or iPod and  
12 automatically transmitted to the central database at the Danish Strategic Research Centre for  
13 Type 2 Diabetes (DD2) when connected to Wi-Fi or mobile data network.[16]  
14  
15  
16  
17  
18  
19

20  
21  
22 [INSERT FIGURE/IMAGE 3 ABOUT HERE]  
23  
24  
25

### 26 *Experimental intervention, phase one*

27  
28 The patient receives a thorough introduction to the InterWalk app with follow-up  
29 instructions. The introduction consists of information and test of the app and the patient can  
30 ask clarifying questions if needed. A detailed manual regarding the InterWalk app is  
31 extradited to each patient. The health professional provides technical guidance and helps the  
32 patient to structure an everyday life with IWT during phase one. Patients are encouraged to  
33 perform IWT using the InterWalk app (see section: InterWalk Walking Training using the  
34 InterWalk Application) as a minimum three times per week, 30 to 60 minutes per session,  
35 with two of the sessions taking place at the health promotion centre and the third is  
36 conducted in the patient's everyday life environment. The aim is that all patients are capable  
37 of continuing IWT using the InterWalk app at the end of phase one (Table 3).  
38  
39  
40  
41  
42  
43  
44  
45  
46  
47  
48  
49  
50  
51  
52  
53  
54  
55  
56  
57  
58  
59  
60



## Effect of Interval walking on type 2 diabetics

## BMJ Open

Table 3, EXAMPLE OF EXPERIMENTAL INTERVENTION FOR ONE WEEK IN PHASE ONE

| Weekday          | Intervention at the Health promotion centre                                                                                                                                                                                                                                                                                                                                                                                                                                                                                                                                                                                                                                                                                                                                                                                                                                                                                                                                                                                    | Independent training in own environment | Notes to health professionals                                                                                                                                                                                                                                                                                                                                                                                       |
|------------------|--------------------------------------------------------------------------------------------------------------------------------------------------------------------------------------------------------------------------------------------------------------------------------------------------------------------------------------------------------------------------------------------------------------------------------------------------------------------------------------------------------------------------------------------------------------------------------------------------------------------------------------------------------------------------------------------------------------------------------------------------------------------------------------------------------------------------------------------------------------------------------------------------------------------------------------------------------------------------------------------------------------------------------|-----------------------------------------|---------------------------------------------------------------------------------------------------------------------------------------------------------------------------------------------------------------------------------------------------------------------------------------------------------------------------------------------------------------------------------------------------------------------|
| <i>Monday</i>    | Duration: 90 minutes<br>1. Warm-up: short walk in a group to the walking point (either a park or an area near the health promotion centre)<br>2. Interval Walking Training: every patient does Interval Walking Training with the InterWalk app for a minimum of 30 minutes. Every patient does the Interval Walking Training by themselves so that the app instructions during the session can be followed. The health professionals guide and facilitate the individual patient if necessary. After the Interval Walking Training everyone goes back to the health promotion centre<br>3. Group conversation at the health promotion centre after doing interval walking with all participating patients. Different focus areas are discussed in the group. Everyone sits on a chair and the health professional participates as a facilitators in the group conversation (examples of focus areas: weather conditions, motivation for exercise, social needs when waking, motivation for a physically active everyday life) |                                         | Remember to encourage and guide every patient to do Interval Walking Training three times a week either by themselves or together with other patients.<br><br>Make sure that everyone are active during the walking sessions.<br><br>If a patient needs to do a new walking test then it is the health professional who should help during the intervention period. Every patient need a new test every forth week. |
| <i>Tuesday</i>   | Rest day                                                                                                                                                                                                                                                                                                                                                                                                                                                                                                                                                                                                                                                                                                                                                                                                                                                                                                                                                                                                                       |                                         |                                                                                                                                                                                                                                                                                                                                                                                                                     |
| <i>Wednesday</i> | Duration: 90 minutes<br>1. Warm-up: short walk in a group to the walking point (either a park or an area near the health promotion centre)<br>2. Interval Walking Training: every patient does Interval Walking Training with the InterWalk app for a minimum of 30 minutes. Every patient does the Interval Walking Training by themselves so that the app instructions during the session can be followed. The health professionals guide and facilitate individual patient if necessary. After the Interval Walking Training everyone goes back to the health promotion centre.<br>3. Group conversation at the health promotion centre after doing interval walking with all participating patients. Different focus areas are discussed in the group. Everyone sits on a chair and the health                                                                                                                                                                                                                             |                                         |                                                                                                                                                                                                                                                                                                                                                                                                                     |

Effect of Interval walking on type 2 diabetics

BMJ Open

professional participates as a facilitators in the group conversation  
 (examples of focus areas: weather conditions, motivation for exercise,  
 social needs when waking, motivation for a physically active everyday  
 life)

*Thursday* Rest day  
*Friday* Rest day  
*Saturday*

Interval walking using  
 the InterWalk  
 application for 30-60  
 minutes.  
 Can be done alone or  
 together with other  
 patients.

*Sunday* Rest day

---

Patients allocated to the experimental intervention do interval walking twice a week, 30 to 60 minutes per session during phase one at the health promotion centre in small groups of 3-12 patients. A third session is conducted in the patient's everyday life environment.

For peer review only

1  
2  
3  
4  
5  
6  
7  
8  
9  
10  
11  
12  
13  
14  
15  
16  
17  
18  
19  
20  
21  
22  
23  
24  
25  
26  
27  
28  
29  
30  
31  
32  
33  
34  
35  
36  
37  
38  
39  
40  
41  
42  
43  
44  
45  
46  
47  
48  
49

1  
2  
3  
4  
5  
6  
7  
8  
9  
10  
11  
12  
13  
14  
15  
16  
17  
18  
19  
20  
21  
22  
23  
24  
25  
26  
27  
28  
29  
30  
31  
32  
33  
34  
35  
36  
37  
38  
39  
40  
41  
42  
43  
44  
45  
46  
47  
48  
49  
50  
51  
52  
53  
54  
55  
56  
57  
58  
59  
60

*Experimental intervention, phase two*

In phase two patients in the experimental intervention group are randomly allocated into two follow-up conditions: with unsupervised Interval Walking Training without support (IWTgroup) or with motivational support (IWTsupport-group) following the intervention period until 52-week follow-up (see Figure 1).

*Interval Walking Group without support (IWTgroup)*

All patients in the Interval Walking Group (IWTgroup) are encouraged to continue to perform IWT with the InterWalk app three times a week, 30 to 60 minutes per session. The patients are not provided with any follow-up or support from health professionals from the end of the intervention period until follow-up at 52-weeks. However, patients are allowed to contact the health professionals at the health promotion centre at any time if necessary.

*Interval Walking Group with support (IWTsupport-group)*

Patients in the Interval Walking Group with support (IWTsupport-group) are also encouraged to do IWT with the InterWalk app three times per week. All patients in the IWTsupport-group receive additional motivational support by the health professionals at the promotion centre (see below for information regarding the motivational support).

*Motivational support (phase two)*

The motivational support is summarised in Table 4. The motivational intervention consists of four motivational interviews with individual goal setting and weekly Short Message

1  
2  
3  
4  
5  
6  
7  
8  
9  
10  
11  
12  
13  
14  
15  
16  
17  
18  
19  
20  
21  
22  
23  
24  
25  
26  
27  
28  
29  
30  
31  
32  
33  
34  
35  
36  
37  
38  
39  
40  
41  
42  
43  
44  
45  
46  
47  
48  
49  
50  
51  
52  
53  
54  
55  
56  
57  
58  
59  
60

Service via the mobile phone (a SMS-track), (see Figure 5 and 6). Furthermore, patients have the opportunity to participate in IWT at predefined timeslots with an Interval Walking Ambassador in the local community near the health promotion centre (see Figure 1).

*Motivational interview and goal setting:* All health professionals from the municipalities are well-educated in conducting the motivational interview with patients. All health professionals working in a health promotion centre in Denmark are obligated to participate in formalised motivational interviewing courses conducted by educators with psychological background. The Motivational interview is a semi-structured interview used to structure the communication between the patient and the health professional. The interview works as a partnership where focused and detailed questions reveal and visualize the patients motivation and barriers towards behaviour change and acknowledgement of patient autonomy.[26] Four motivational interviews are scheduled for each patient in the IWT support-group. See Table 4 for more detail. The motivational interview seek to help the patients reflect on their physically active habits and to set individual motivating goals related to everyday life.[27] The health professional secures all notes and reflections from the interview in the InterWalk database. As more than one interview is conducted over the trial period fidelity may be ensured when the health professional uses the patient's reflections from the former interview to help reflect upon motivation and barriers towards changes in the next motivational interview. The goal setting is based on the S.M.A.R.T.-principle derived from the Goal Setting Theory developed by Edwin Locke.[28] S stands for Specific

(e.g. what do I want to accomplish?), M for Measurable (e.g. specific and measurable), A for achievable (realistic), R for relevant (individual goals) and T for timely (not too big to achieve in a short period).[29]

---

**Table 4. MOTIVATIONAL INTERVIEWS WITH INDIVIDUAL GOAL SETTING**

**PHASE TWO, IWTsupport-group**

|                                                                                   |                                                                                                                                                                                                                                                                                                                                                                                                                                                                                                                                        |
|-----------------------------------------------------------------------------------|----------------------------------------------------------------------------------------------------------------------------------------------------------------------------------------------------------------------------------------------------------------------------------------------------------------------------------------------------------------------------------------------------------------------------------------------------------------------------------------------------------------------------------------|
| <i>Four semi-structured motivational interviews with individual goal setting,</i> | <ul style="list-style-type: none"> <li>○ The interviews aim at helping the patient to reflect on why and how physical activity can be incorporated in everyday life</li> <li>○ Make informed choices regarding behavioral changes regarding physical activity</li> <li>○ Relate to own everyday life</li> <li>○ Clarify barriers and facilitators of importance for the individual</li> <li>○ Two to three individual goals are set at all interviews</li> <li>○ The goals is based on need in the individual everyday life</li> </ul> |
|-----------------------------------------------------------------------------------|----------------------------------------------------------------------------------------------------------------------------------------------------------------------------------------------------------------------------------------------------------------------------------------------------------------------------------------------------------------------------------------------------------------------------------------------------------------------------------------------------------------------------------------|

---

A short resume with the individual goal setting is written after all interviews in the database. The written text is prospectively incorporated in the following interviews with the patient at the health promotion centre

---

The interviews are placed in Week 16, 20, 28, 40 post baseline-test. Goal setting in the interviews are based on the *the S.M.A.R.T.- principle derived from the Goal Setting Theory developed by Edwin Locke*. [28]

*Short Message Service (henceforth referred to as text message)* enables inexpensive and possibly effective interaction between patients and health professionals at any time or place.[30,31] Communication as well as feedback is believed to enhance motivation through feelings of competence and relatedness [32], which may positively affect adherence to treatment. Text messages have shown positive effect on various health outcomes including diabetes self-management when used in behavior change interventions. Further, a higher effectiveness and lower attrition rate has been observed when customized and tailored messages is used.[30] In the present study, the patient receives two types of text messages during phase two (see Figure 4 and 5). The first type is a weekly and interactive

## Effect of Interval walking on type 2 diabetics

## BMJ Open

1  
2  
3  
4  
5  
6  
7  
8  
9 text message consisting of questions regarding the amount of IWT performed during the past  
10 week (see Figure 4). The patients are required to give feedback by returning a text message  
11 with one of the three response options provided. If the patient does not reply for two  
12 consecutive weeks, or if the patient answers that she/he has not been walking, a personal  
13 phone call to the patient is conducted from a health professional from the local health  
14 promotion centre. The aim of the call is to encourage and help the patient to plan IWT to fit  
15 the individual life of the patient. The second type of text message is sent every fourth week,  
16 encouraging the patients to perform the walking test using the InterWalk app without a  
17 requirement of feedback (see Figure 5).  
18  
19  
20  
21  
22  
23  
24  
25  
26  
27  
28  
29

30  
31 [INSERT FIGURE 4 AND 5 ABOUT HERE]  
32  
33  
34

35 *Interval Walking Ambassadors:* Using peers to educate other patients with  
36 T2D has shown effective in providing ongoing support over a longer period.[33,34] In this  
37 study, volunteer patients with T2D are recruited through the Danish Diabetes Association,  
38 where a consultant contacts possible patients via e-mail. The Interval Walking Ambassadors  
39 do IWT locally in phase two with patients from the IWTsupport group. The Interval  
40 Walking Ambassadors receives a two-day training programme in the participating  
41 municipality by researchers from the InterWalk research group. At any time during phase  
42  
43  
44  
45  
46  
47  
48  
49  
50  
51  
52  
53  
54  
55  
56  
57  
58  
59  
60

1  
2  
3  
4  
5  
6  
7  
8  
9 two, patients can attend IWT at predefined timeslots with an Interval Walking Ambassador  
10  
11 (see Table 2).

### 12 13 14 15 *Adherence to interventions*

16  
17 To prevent patients from dropping out during phase one of the trial, patients are contacted  
18 by phone by a trained health professional if they fail to appear at the planned training  
19 sessions. Up to five attempts are made to contact the patient. In phase two only patients  
20 allocated to the IWTsupport-group are monitored by SMS-track and supervised during the  
21 phase until week 52. Patients in IWTgroup have no contact with the health professionals  
22 until 52-weeks follow-up (see Figure 1).  
23  
24  
25  
26  
27  
28  
29  
30  
31  
32

### 33 *Control intervention – Standard care*

34  
35 Patients in the control group receive the standard rehabilitation treatment offered to  
36 patients with T2D in Denmark in a multimodal setting including physical activity (phase  
37 one, Figure 1). The duration of rehabilitation treatment differs between participating  
38 municipalities, but may not be shorter than eight weeks during phase one. At the end of the  
39 standard care rehabilitation program in the municipalities there is no follow-up on the  
40 exercise intervention, which is the normal procedure in Danish municipalities (phase two,  
41  
42  
43  
44  
45  
46  
47  
48  
49 Figure 1).[35]  
50  
51  
52  
53  
54  
55  
56  
57  
58  
59  
60

1  
2  
3  
4  
5  
6  
7  
8  
9  
10  
11  
12  
13  
14  
15  
16  
17  
18  
19  
20  
21  
22  
23  
24  
25  
26  
27  
28  
29  
30  
31  
32  
33  
34  
35  
36  
37  
38  
39  
40  
41  
42  
43  
44  
45  
46  
47  
48  
49  
50  
51  
52  
53  
54  
55  
56  
57  
58  
59  
60

The participating municipalities offer group exercise twice a week at the health promotion centres with 6-15 patients participating depending on the population size in the participating municipality. The content of the group exercise period is based on clinical guidelines in Denmark. A typical session is structured with first a short warm-up session followed by a strength and cardio part and finished with a cool-down period with strengthening (See Table 2). Furthermore, it is recommended that the patients have regularly consultation at the general practitioner every third month.

#### ***Additional rehabilitation care (Co-interventions)***

All patients receiving rehabilitation at either a health promotion centre or at the hospital receives an offer of specific disease related patient education, diet counselling and smoking cessation.[35] It is optional whether the patient participate in one or all additional offers.

*Disease specific patient education* includes a section focused on behaviour modification and self-management and a specific part on diseases were the patients get knowledge regarding sequelae. *Diet counselling* regarding nutritional advice when living with T2D is handled by a dietitian. *Smoking cessation* is either group based or in individual process and is handled by smoking cessation counsellors.

#### **Trial endpoints and Assessments**



1  
2  
3  
4  
5  
6  
7  
8  
9  
10  
11  
12  
13  
14  
15  
16  
17  
18  
19  
20  
21  
22  
23  
24  
25  
26  
27  
28  
29  
30  
31  
32  
33  
34  
35  
36  
37  
38  
39  
40  
41  
42  
43  
44  
45  
46  
47  
48  
49  
50  
51  
52  
53  
54  
55  
56  
57  
58  
59  
60

Previous studies have established that physical activity influences glycaemic control [36] and Karstoft and colleagues (2013) has shown that physical activity with Interval Walking Training had effect on glycaemic control in patients with T2D. [15] Moreover, medication and dietary interventions have also proven to improve glycaemic control and reduce disease related complications.[37–39] In the present trial the primary outcome focus on physical activity in relation to everyday life.

Data on the primary and secondary outcomes are obtained at baseline, post intervention (after 8-12 weeks) and 52 weeks after enrolment (Table 5). To standardize all measurements between health professionals and participating centres, all health professionals uses standardised protocols crafted for the trial regarding procedures and measurements. All data are entered directly in an online database (see section: Data management and quality control).

## Effect of Interval walking on type 2 diabetics

Table 5, SUMMARY OF DATA COLLECTION AND MEASURES

| Measurements                                         | Description                                                                          | Baseline | 8-12 weeks | 52 weeks |
|------------------------------------------------------|--------------------------------------------------------------------------------------|----------|------------|----------|
| <i>Demographic</i> <sup>*†‡</sup>                    |                                                                                      |          |            |          |
| Age (median)                                         | Obtained using self report                                                           | x        | -          | -        |
| Women                                                |                                                                                      | x        | -          | -        |
| Marital status                                       |                                                                                      | x        | -          | -        |
| Diabetes duration                                    |                                                                                      | x        | -          | -        |
| Education level                                      |                                                                                      | x        | -          | -        |
| Height, weight, body mass index                      | Obtained using standard procedures                                                   | x        | x          | x        |
| <i>Medical history</i> <sup>*†‡</sup>                | Obtained using medical records                                                       |          |            |          |
| History of Heart disease                             |                                                                                      | x        | x          | x        |
| Hypertension                                         |                                                                                      | x        | x          | x        |
| Kidney disease                                       |                                                                                      | x        | x          | x        |
| Chronic Obstructive Pulmonary Disease (COPD)         | Defined by FEV1<70%                                                                  | x        | x          | x        |
| <i>Medicine</i> <sup>*†</sup>                        |                                                                                      |          |            |          |
| Self-reported use of medication                      |                                                                                      | x        | x          | x        |
| Register-data use of medicine                        |                                                                                      | x        | x          | x        |
| <i>Physical fitness</i> <sup>*</sup>                 |                                                                                      |          |            |          |
| Moderate-to-Vigorous-intensity                       | Accelerometer (Axivity AX3, Newcastle, UK), worn for seven consecutive days, 3 times | x        | x          | x        |
| Total physical activity (VO <sub>2</sub> -peak)      | InterWalk - Walking test performed using an iPod touch or iPhone                     | x        | x          | x        |
| <i>Strength</i> <sup>*</sup>                         | Lower extremities Sit-To-Stand                                                       | x        | x          | x        |
| <i>Patient Reported Outcomes (PROs)</i> <sup>*</sup> |                                                                                      |          |            |          |
| Behavioural Regulation in Exercise                   | Obtained using BREQ-2, Behavioural Regulation in Exercise Questionnaire              | x        | x          | x        |

## Effect of Interval walking on type 2 diabetics

## BMJ Open

|                                    |                                                                                                                    |   |   |   |
|------------------------------------|--------------------------------------------------------------------------------------------------------------------|---|---|---|
| Physical Activity                  | <i>Obtained using R-PAQ, Resent Physical Activity Questionnaire</i>                                                | x | x | x |
| Health related quality of life     | <i>Obtained using SF-12, Short Form - Health Related Quality of life Questionnaire</i>                             | x | x | x |
| Automaticity of behaviour          | The Self-Report Habit Index                                                                                        |   | x | x |
| Personality traits†                | <i>Obtained using NEO-FFI, Neuroticism, Extroversion and Openness – Five Factor Inventory (Personality traits)</i> | x | - | - |
| Risk behaviour‡                    | <i>Obtained using SES, Sensation Seeking Scale (risk behaviour)</i>                                                | x | x | x |
| <i>Adherence to interventions*</i> |                                                                                                                    |   |   |   |
| Attendance registration            | From baseline to 8-12 weeks                                                                                        | x | x | x |
| Log in the InterWalk app           | Measured by the electronic log in the InterWalk-app                                                                | x | x | x |
| <i>Registry data assessment*‡</i>  |                                                                                                                    |   |   |   |
| Mortality, cause of death          | Obtained using medical records                                                                                     | - | x | x |
| Hospitalization                    |                                                                                                                    | - | x | x |
| Contract with general practitioner |                                                                                                                    | - | x | x |

\* Article 1: The effectiveness of smartphone delivered Interval Walking Training on moderate-and-vigorous physical activity versus standard care in patients with type 2 diabetes: a parallel group single-blinded randomized controlled trial.

†Article 2: Baseline characteristics and personality traits in patients with type 2 diabetes: descriptive study of all participants

‡Article 3: Nay Sayers – Characteristics of patients who does not want to be part of a physical activity study related to everyday life; all patients referred to the health promotion centre in the municipalities participating in the randomized controlled trial.

§Article 4: Effectiveness of smartphone delivered Interval Walking Training versus standard care in patients with type 2 diabetes on HbA1c and HDL, high-density lipoprotein; LDL, low-density lipoprotein: A sub-study to the randomized controlled trial (The InterWalk Trial, article 1), measured in a sub-sample (n=40).

### ***Primary outcome***

The primary outcome is change in moderate-to-vigorous-intensity physical activity from baseline to 52-week follow-up.

### ***Secondary outcomes***

The key secondary outcome changes in motivation for sustaining a behavioural change with physical activity in everyday life at 52-week follow-up.

Other secondary outcomes of interest are changes in patients' fitness level measured as VO<sub>2</sub>-peak by the standardised walking test (part of the InterWalk application) and health-related quality of life. Strength in the lower extremities, adherence to intervention and impact of personality traits on physical activity in everyday life are also considered exploratory secondary outcomes. All outcomes are measured at baseline, after intervention and at 52-week follow-up (see Figure 2).

### ***Data collection***

#### ***Level of daily moderate-to-vigorous-intensity physical activity***

It is important to gain knowledge into physical activity in everyday life. To determine level of daily moderate-to-vigorous-intensity physical activity a hip-mounted physical activity monitor (Axivity AX3, Newcastle, UK) is worn for seven consecutive days, at three time periods during the trial period; after baseline-test, after the intervention period and again at

1  
2  
3  
4  
5  
6  
7  
8  
9 52-weeks follow-up. The monitor is fixed using adhesive tape (Leukomed T, BSN medical,  
10 Germany) on right side the lumbar spine. Additionally, a monitor is fixed on on the lateral  
11 side of the right thigh (Leukomed T, BSN medical, Germany) for supporting information  
12 about posture.[25] The patients are instructed not to remove the physical activity monitor at  
13 any time during the three time periods. If de-attached, the participants are trained in fixing  
14 the monitors correctly and are instructed to note the incident. If the patients need help in  
15 fixing the monitors correctly the health professionals at the health promotion centre are  
16 educated to help.  
17  
18  
19  
20  
21  
22  
23  
24  
25  
26  
27

#### 28 *Physical activity diary*

29  
30 In order to validate the physical activity level during the seven days with physical activity  
31 monitors we ask the patient to complete a seven-day diary to report number of work- and  
32 sleep hours, bicycling and strength training sessions at the three time periods on a daily  
33 basis. The physical activity monitor and the diary are returned free-of-charge via mail. The  
34 patient is contacted by phone after within one week if the physical activity monitors are not  
35 returned as expected.  
36  
37  
38  
39  
40  
41  
42  
43  
44  
45

#### 46 *Motivation for behaviour change with physical activity*

47  
48 Changes in motivation for sustaining a behavioural change with physical activity in  
49 everyday life is measured with the Behavioural Regulation of Exercise Questionnaire  
50  
51  
52  
53  
54  
55  
56  
57  
58  
59  
60

1  
2  
3  
4  
5  
6  
7  
8  
9 (BREQ-2) which measures individual motivation for physical activity. The questionnaire  
10 consists of 19 questions in a 0-4 Likert format.[40] In addition to the questionnaire, patients  
11 are asked to answer four questions in a 0-4 Likert format, regarding motivation for physical  
12 activity after being diagnosed with T2D.  
13  
14  
15  
16

### 17 18 19 20 *Health Related Quality of Life*

21 The patients Health Related Quality of Life is very important to maintain after being  
22 diagnosed with T2D.[41] To gain knowledge into the individual perception of quality of life  
23 on a physical and mental level we use the Short-Form Health Survey (SF-12). The  
24 questionnaire consists of 12 questions and uses a Likert scale of 1-3 for the physical function  
25 items; 1-5 for the bodily pain, social function, and general health perceptions items; 1-6 for  
26 the vitality and mental health; and a dichotomous scale of yes/no for the presence of role  
27 function limitations. The higher score, the higher level of health or functioning.[42]  
28  
29  
30  
31  
32  
33  
34  
35  
36  
37  
38  
39

### 40 *Maintenance of behaviour change with physical activity*

41 Automaticity of behaviour is essential when new habits become present in the everyday  
42 life.[43] To measure if the patient has adopted new habits as a result of the intervention we  
43 ask the patient to answer four questions from The Self-Report Habit Index. The Index uses a  
44 0-4 Likert format and the four questions to be answered measures automatic activation,  
45 frequency of behaviour and relevance to self-identity related to physical activity.[44]  
46  
47  
48  
49  
50  
51  
52  
53  
54  
55  
56  
57  
58  
59  
60

*VO<sub>2</sub>-peak*

VO<sub>2</sub>-peak is measured by a validated and standardised walking test consisting of 5 stages incorporated in the InterWalk app; 1) 30 sec. of standing still, 2) 2 min. of slow walking 3) 2 min. of walking at moderate intensity 4) 2 min. walking at high intensity 5) 1 min. walking at highest intensity possible. The four paces are self-selected (See, Figure 3 and 4).[25] The test is performed with an iPod placed in the pocket at the hip and the instructions are delivered from the app through earphones. To ensure the right walking intensity in the intervention period, the patients are asked to perform the test every 4<sup>th</sup> week.[16]

*Strength in the lower extremities*

The sit-to-stand test (30 seconds) measures the lower body strength and will be administered using a chair without arms. The patient is encouraged to complete as many full stands as possible within a 30-sec time limit.[45]

*Adherence to the intervention*

Adherence is determined by an evaluation and quantification of the electronic log of data from the InterWalk app to the central database of all uploaded data.

*Self-rated physical activity*

1  
2  
3  
4  
5  
6  
7  
8  
9  
10  
11  
12  
13  
14  
15  
16  
17  
18  
19  
20  
21  
22  
23  
24  
25  
26  
27  
28  
29  
30  
31  
32  
33  
34  
35  
36  
37  
38  
39  
40  
41  
42  
43  
44  
45  
46  
47  
48  
49  
50  
51  
52  
53  
54  
55  
56  
57  
58  
59  
60

The “Recent Physical Activity Questionnaire” (RPAQ) has 9 main questions, which covers 4 domains of physical activity: domestic life, work, recreation and transport. Physical Activity is estimated in MET’s (Metabolic Equivalent). In answering the questions in the questionnaire, the patient will answer in regards to the last four weeks with physical activity in the everyday life.[46]

#### *Personality traits*

The NEO-Five Factor Inventory (NEO-FFI) [47] consists of 60 questions in a 0-4 Likert format constructed by selecting 2 items from each of the six facets characterizing each of the five personality traits (Neuroticism, Extraversion, Openness, Agreeableness, Conscientiousness) assessed by NEO-PI-R. The Sensation Seeking Scale (SES) [48] is a 40 items self-administered questionnaire consisting of 40 questions designed to test the tendency towards varied, novel and intense sensations.

#### *Demographic, social economic and anthropometry measures*

Information on height, weight, waist and hip circumference is collected before inclusion through an electronic questionnaire at the first formal meeting at the health promotion centre and after the intervention period and again at 52-week follow-up. Waist circumference is measured at the point between the top of the iliac crest and the bottom of the costae regardless of the placement of the umbilicus. A Tanita stadiometer is used to measure height



1  
2  
3  
4  
5  
6  
7  
8  
9 and an electronic weight to measure weight. Data on self-reported information together with  
10 relevant national registers will be used to obtain information regarding hospitalization, co-  
11 morbidities, medical history, use of medicine and mortality.  
12

13  
14  
15 *Height* measurement is conducted using a portable altimeter (Tanita  
16 Stadiometer). The measurement is done without shoes and is repeated two times with each  
17 measure to nearest 0,1 cm. If the two measures are dissimilar with more than 0,5 cm, then  
18 the measurement is repeated. *Weigh* is measured in kilograms (kg) using an electronic  
19 weight. The measure is repeated two times with each measure to nearest 0,1 cm. If the two  
20 measures are dissimilar with more than 0,5 kg, then the measurement is repeated a third  
21 time. The patient is weighed fully dressed and one kilo is subtracted from each measure.  
22  
23 *Hip circumference* is measured on the skin on the crest of the hipbone. The patient is asked  
24 to place a finger in the belly bottom and the measure is done with a tape measure (2  
25 meters) placed on the upper side of the patients' finger. If the two measures are dissimilar  
26 with more than 0,5 cm, then the measurement is repeated a third time.  
27  
28  
29  
30  
31  
32  
33  
34  
35  
36  
37  
38  
39  
40  
41

#### 42 **Safety criteria and adverse events**

43  
44 Patients are informed that performing the InterWalk walking test may cause some degree of  
45 breathlessness as patients are expected to reach 80-85% of VO<sub>2</sub>-peak during the walking test.  
46  
47

48 All other measurements are not associated with any known risk or discomfort. Injuries  
49 linked to the intervention are registered, if informed to the health professionals at the health  
50  
51  
52  
53  
54  
55  
56  
57  
58  
59  
60

1  
2  
3  
4  
5  
6  
7  
8  
9 promotion centres, during the trial period. In case of severe adverse events, the Scientific  
10 Ethical Committee of the Capital Region of Denmark is informed.  
11  
12

### 13 14 15 **Sample size considerations** 16

17 The minimum difference of interest (MDI) is 10 minutes per day. Based on existing  
18 experimental evidence, we expect the standard deviation (SD) of the change in moderate-  
19 and-vigorous physical activity from baseline to 12 month follow up to be between 1.2 – 2.3  
20 times the effect size.[49,50] Therefore, SD twice the MDI (20 min of moderate-and-  
21 vigorous physical activity) per day was applied in the sample size calculations. After  
22 applying Bonferroni adjustment due to multiple comparisons in the three group trial a total  
23 of 190 participants are needed to obtain a statistical power (1- $\beta$ ) of 80% with an  $\alpha$  of 0.017  
24 (two-tailed). Allowing for an attrition rate of 30%, 272 patients (91 in the control group  
25 and 181 in experimental group) are recruited. The setting enables recruitment until  
26 December 15<sup>st</sup> 2016. The sample size is truncated at 272 participants or the N reached at  
27 the end of recruitment period - whatever is reached first (see section 'Participants').  
28  
29  
30  
31  
32  
33  
34  
35  
36  
37  
38  
39  
40  
41  
42  
43

### 44 **Randomisation, sequence generation and allocation concealment** 45

46 After returning the physical activity monitors patients are randomised to either standard care  
47 or experimental group after baseline test (phase one). Allocation to either IWTgroup or  
48 IWTsupport-group on patients allocated to the experimental group is concealed until after  
49  
50  
51  
52  
53  
54  
55  
56  
57  
58  
59  
60

1  
2  
3  
4  
5  
6  
7  
8  
9 the post intervention test (phase two). A health professional associated with the trial,  
10 telephones the patient and inform about random allocation after returning the PA monitors to  
11 either IWT-group or IWTsupport-group. The patients are stratified by gender to ensure an  
12 equal number across all groups. The allocation sequence is generated through a standardised  
13 computer program by an independent researcher (RC). The allocation sequence is concealed  
14 until the trial arms are assigned. A Flow of patients is depicted in Figure 2.  
15  
16  
17  
18  
19  
20  
21  
22

### 23 **Blinding**

24  
25 The scientific staff is blinded to patient allocation from baseline to the 52-week follow-up is  
26 completed for all patients. The health professionals at the promotion centre are not blinded  
27 to allocation to either standard care or experimental groups.  
28  
29  
30  
31  
32  
33

### 34 **Statistical methods**

35  
36 All analyses will be conducted according to the Intention-To-Treat principle. Continuous  
37 endpoints will be analysed using repeated measures analysis of covariance in a mixed  
38 linear model. Categorical and dichotomous end points will be analysed with the use of  
39 logistic regression. The model will include with group, and sex as fixed effects, with the  
40 baseline value as a covariate.  
41  
42  
43  
44  
45  
46  
47

48 All patients randomised to one treatment, will be analysed according to the treatment to  
49 which the patient was allocated, irrespective of whether they received this or some other  
50 treatment, or no treatment at all. The ITT population will be handled all patients randomised  
51  
52  
53  
54  
55  
56  
57  
58  
59  
60

1  
2  
3  
4  
5  
6  
7  
8  
9  
10  
11  
12  
13  
14  
15  
16  
17  
18  
19  
20  
21  
22  
23  
24  
25  
26  
27  
28  
29  
30  
31  
32  
33  
34  
35  
36  
37  
38  
39  
40  
41  
42  
43  
44  
45  
46  
47  
48  
49  
50  
51  
52  
53  
54  
55  
56  
57  
58  
59  
60

to the three treatment arms, and the dataset is equal to the “all patients randomized set” (APRS). Missing values due to patients’ absence from follow-ups or withdrawal from the study are to be expected in clinical trials. Several approaches are described for handling missing data in the ITT analysis, and among them “baseline observation carried forward” (BOCF: i.e., a null-responder imputation, where the level at baseline is also considered the last). A linear mixed model analysis includes all patients with a baseline assessment, and includes both fixed and random factors. Thus, repeated linear mixed model method is chosen for the primary analyses in this trial (i.e., no data imputation), whereas the BOCF imputation, as well as the ‘Per Protocol’ population will be applied for the purpose of sensitivity analysis. Also, we will explore whether potentially important covariates such as age, sex, disease duration, degree of overweight (using BMI), and smoking status at enrollment/baseline could potentially confound the results from the primary analyses (i.e. an extra pre-specified sensitivity analysis). Exploratory analyses of the treatment effects will be performed on some the secondary outcomes.

#### ***Data management and quality control***

All data are entered in an SSL-secured, online-based database developed by the Danish Stakeholder Help2Run (CVR: 34801088). The online-based database logistically handles the data gathered at baseline, after intervention in phase one, and during follow-up (phase two) and after 52 weeks. Data on demography, measurements, tests and questionnaires are

1  
2  
3  
4  
5  
6  
7  
8  
9 entered directly in the database available via a project-specific  
10 homepage ([http://www.runsafe.dk/mtd/login/admin-](http://www.runsafe.dk/mtd/login/admin-signi)  
11 [signihttps://www.runsafe.dk/mtd/login/admin-signin](https://www.runsafe.dk/mtd/login/admin-signin)). A protected back-end system  
12 (https://www.runsafe.dk/mtd/admin) is used to logistically handle information on  
13 demography, measurements, tests and questionnaires on each participant in the trial (for  
14 information on Interval Walking Training using the InterWalk app see '*Interval Walking*  
15 *Training using The InterWalk Application*'). The system was approved in 2014 after an  
16 inspection by the Danish Data Protection Agency. Access to personalized data from  
17 the InterWalk participants is only possible using a personalized username and password.  
18 Only specified researchers are allowed to administrate the back-end system and each  
19 researcher and project member with access to the back-end has a unique username and  
20 personal password for the back-end system. All activities, including changing data and  
21 downloading data, in the back-end system are logged in accordance with the rules and  
22 regulations from the Danish Data Protection Agency. A unique subject ID number will be  
23 subscribed to all patients in order to anonymize data. The identification key (ID to personal  
24 information) will be encrypted and stored securely and separately from the unique ID  
25 number on a secure database.  
26  
27  
28  
29  
30  
31  
32  
33  
34  
35  
36  
37  
38  
39  
40  
41  
42  
43  
44  
45  
46  
47

### 48 ***Ethics and Dissemination***

49  
50 The InterWalk trial contributes with important knowledge on different treatment approaches  
51 in the rehabilitation of patients with T2D. Physical activity and exercise have beneficial  
52  
53  
54  
55  
56  
57  
58  
59  
60

1  
2  
3  
4  
5  
6  
7  
8  
9 effect on patients with T2D when the interventions are conducted in well-designed efficacy  
10 studies.[2,4,6] However, little is known on whether this effect also is present in effectiveness  
11 studies or “real-world setting” studies. These studies are of great importance and relevance  
12 regarding evidence-based medicine highlighting the importance of the InterWalk trial.  
13  
14

15  
16  
17 The InterWalk trial has a pragmatic design that allows for different  
18 intervention periods in the participating municipalities. Furthermore, the interventions are  
19 conducted directly in the clinical setting giving a more reliable frame of the experienced  
20 challenges in a population with T2D. We believe that the implementation of the study results  
21 will have a smoother implementation phase, as the health professionals already are familiar  
22 with the preceding's.  
23  
24  
25  
26  
27  
28  
29

30  
31 The trial gives valuable insight into the impact of different motivational and  
32 supportive tools as well as knowledge about individual motivation and the impact on  
33 sustaining a newly acquired behaviour change regarding physical activity in everyday life.  
34  
35  
36

37 Interval Walking Training is expected to be a suitable and effective way of  
38 providing moderate-vigorous physical activity for at large group of patients with T2D. IWT  
39 can be done at any time and anywhere and is thus integrated and tailored to fit individual  
40 everyday life. The overall objective is to promote lifelong physical activity for the individual  
41 and we believe that experiences from the present trial can help when planning future  
42 interventions with IWT to patients with various lifestyle diseases e.g. coronary heart  
43 diseases.  
44  
45  
46  
47  
48  
49  
50  
51  
52  
53  
54  
55  
56  
57  
58  
59  
60

1  
2  
3  
4  
5  
6  
7  
8  
9  
10  
11  
12  
13  
14  
15  
16  
17  
18  
19  
20  
21  
22  
23  
24  
25  
26  
27  
28  
29  
30  
31  
32  
33  
34  
35  
36  
37  
38  
39  
40  
41  
42  
43  
44  
45  
46  
47  
48  
49  
50  
51  
52  
53  
54  
55  
56  
57  
58  
59  
60

It is a major advantage that the trial is designed as a randomised controlled trial in a “real-world setting” with a study population representing patients with T2D referred to rehabilitation. Furthermore, data and results are collected consecutively and directly in the clinical setting in which the interventions are to be used after the trial. Together with the very limited number of inclusion and exclusion criteria and a stratification of patients on gender secures external validity of the trial and thus will add important information to the current body of evidence on T2D treatment.

All data from eHealth solutions as the InterWalk app are electronically monitored. The patient is not dependent on opening hours at the health promotion centre as the InterWalk is either installed on an iPhone or an iPod. This gives a unique possibility for the patient to be physically active whenever it fits in their everyday life.

We acknowledge that physical activity only has effect when adherence is high, which is why we first compare standard care with interval walking for a shorter period (phase one) followed by a re-allocation of patients in the experimental group to either interval walking with or without motivational support (phase two). All groups have a 52-week follow-up. The trial design enables us to investigate if patients are able to maintain a newly acquired behaviour change with physical activity in everyday life with or without motivational support for a longer period.

All personalized data and measures are stored on a central online-based database developed to logistically handle all data collected at baseline and during follow-

1  
2  
3  
4  
5  
6  
7  
8  
9 up. The backend system (<https://www.runsafe.dk/mtd/admin/>) secures all information  
10 from each patient. The construction of the database with personalized usernames,  
11 passwords, and specific permissions to all health professionals and administering  
12 permissions to scientific staff in the backend secures all data. Furthermore, all activities are  
13 logged.  
14  
15  
16  
17  
18

19 All outcomes measures are assessed blinded to allocation at baseline and the  
20 primary outcome is assessed blinded to intervention in the experimental group after the  
21 intervention period. All measures are conducted by the health professionals at the health  
22 promotion centres and are blinded for allocation after intervention in the experimental group  
23 with IWT until after return of the physical activity monitors by the patient. All statistical  
24 analyses are blinded to researchers, reducing the risk of detection and interpretation  
25 bias.[51–53] All secondary outcomes, but VO<sub>2</sub>-peak and the Sit to Stand Test are self-  
26 reported and by nature likely to be biased. The patients answer questionnaires independently  
27 of the health professionals at the health promotion centres.  
28  
29  
30  
31  
32  
33  
34  
35  
36  
37  
38

39 The secondary outcomes of motivation for physical activity and behaviour  
40 change are of highly importance as knowledge concerning motivational support and  
41 maintenance of effect (new habits with physical activity) to our knowledge is lacking in  
42 patients with T2D. This knowledge will help health professionals to better tailor the  
43 treatment and hereby potentially achieve a higher adherence to the programme following the  
44 supervised intervention.  
45  
46  
47  
48  
49  
50  
51  
52  
53  
54  
55  
56  
57  
58  
59  
60



1  
2  
3  
4  
5  
6  
7  
8  
9 The limitations in this trial are similar to those of other exercise trials where  
10 physical testing and time-of-day and day-to-day variation constitute a challenge. We have  
11 standardised all testing protocols for all procedures to reduce the variation and run a  
12 routine program of on-going calibration and training of the health professionals.  
13  
14  
15  
16

17 The trial is conducted in accordance with the Helsinki Declaration II.[54] All  
18 eligible patients receive written and oral informed consent prior to inclusion before any  
19 additional trial procedures. Data on all screened patients are registered in order to report  
20 characteristics of in-eligible patients and written informed consent is also obtained from  
21 these patients. The patients can withdraw from the trial at all times during the trial period.  
22 This has no consequence for any other future treatment. If patients discontinue the trial  
23 intervention, standard care is offered for the rest of the intervention period. All results from  
24 the trial, negative, positive or inconclusive results, are disseminated in international peer-  
25 reviewed scientific papers and at national and international conferences. We follow the  
26 guidelines from the International Committee of Medical Journal Editors when authorship is  
27 determined. The results will be reported when all long-term data become accessible.  
28  
29  
30  
31  
32  
33  
34  
35  
36  
37  
38  
39  
40  
41

42 Furthermore, all results are shared with the participating municipalities and  
43 participating health professionals and are used to develop future intervention and  
44 implementation strategies in the Danish municipalities.  
45  
46  
47  
48  
49

## 50 **Trial status**

51  
52  
53  
54  
55  
56  
57  
58  
59  
60

1  
2  
3  
4  
5  
6  
7  
8  
9 The inclusion period started in January 2015 and is scheduled to finish in December 2017  
10 with a 52-week follow-up. To ensure enrolment of patients in the trial we are open for  
11 collaborations with new municipalities during the trial period. So far the trial has resulted  
12 in collaboration with both rural and urban municipalities in Denmark. The inclusion rate is  
13 carefully monitored every week by the research team. In November 2016, 216 patients had  
14 been enrolled in the trial.  
15  
16  
17  
18  
19  
20  
21  
22  
23

24 **Contributors** LSV, MR-L and HL drafted the manuscript. All authors made substantial  
25 contributions to conception and design, and revised the manuscripts critically for important  
26 intellectual content. All authors have given their approval for the manuscript to be  
27 published.  
28  
29  
30  
31  
32  
33  
34

35 **Funding.** The work has been supported by two grants by the Tryg Foundation, Denmark.  
36 The Centre for Physical Activity Research (CFAS) is supported by a grant from  
37 TrygFonden. The study was further supported by grants from. The Augustinus Foundation  
38 and two Foundations in the Capital Region of Denmark – the Foundation for Prevention  
39 and the Foundation for Intersectorial Research Projects have also supported the work.  
40  
41  
42  
43  
44  
45

46 Laura Staun Valentiner is supported by a grant from the Municipality of Copenhagen,  
47 Denmark and The Danish Physiotherapist Foundation. Mathias Ried-Larsen is supported  
48 by a post-doctoral grant from the Danish Diabetes Academy supported by the Novo  
49  
50  
51  
52  
53  
54  
55  
56  
57  
58  
59  
60

1  
2  
3  
4  
5  
6  
7  
8  
9 Nordisk Foundation and The Vissing Foundation. CIM/CFAS is a member of DD2 - the  
10 Danish Center for Strategic Research in Type 2 Diabetes (the Danish Council for Strategic  
11 Research, grant no. 09-067009 and 09-075724). Robin Christensen is supported by grants  
12 from The Oak Foundation. Henning Langberg is supported by a professor grant from the  
13 Municipality of Copenhagen, Denmark.  
14  
15  
16  
17  
18  
19  
20  
21

### 22 **Ethics approval**

23  
24 The local regional Research Ethics Committee in Denmark (H-1-2014-074) and the Danish  
25 Data Protection Agency (j.nr. 2014-54-0897) has approved the trial.  
26  
27  
28  
29  
30

### 31 **Acknowledgement**

32  
33 The authors thank the health professionals in the Municipalities of Copenhagen and  
34 Guldborgsund and Bornholm Hospital in Denmark for helping recruit, test and train with  
35 all patients in the study.  
36  
37  
38  
39  
40  
41

### 42 **Competing interests statement**

43  
44 We have read and understood The BMJ policy on declaration of interests and declare no  
45 competing interests.  
46  
47  
48  
49  
50  
51  
52  
53  
54  
55  
56  
57  
58  
59  
60

## REFERENCES

- 1 Colberg, SR, Sigal, RJ, Fernhall, B, Regensteiner, JG, Blissmer, B, Rubin, RRR, Chanan-Taber, L, Albright, AL, Braun B. Exercise and Type 2 Diabetes. *Diabetes Care* 2010;**33**:2692–6. doi:10.2337/dc10-1548
- 2 Plotnikoff RC, Costigan S a., Karunamuni ND, *et al.* Community-based physical activity interventions for treatment of type 2 diabetes: A systematic review with meta-analysis. *Front Endocrinol (Lausanne)* 2013;**4**:1–17. doi:10.3389/fendo.2013.00003
- 3 Umpierre D, Kramer CK, Leita CB, *et al.* CLINICIAN ' S CORNER Physical Activity Advice Only or Structured With HbA 1c Levels in Type 2 Diabetes. *JAMA* 2013;**305**:190–9.
- 4 Nicolucci A, Balducci S, Cardelli P, *et al.* Relationship of exercise volume to improvements of quality of life with supervised exercise training in patients with type 2 diabetes in a randomised controlled trial : the Italian Diabetes and Exercise Study ( IDES ). *Diabetologica* 2012;**55**:579–88. doi:10.1007/s00125-011-2425-9
- 5 Vadstrup ES, Frølich A, Perrild H, *et al.* Health-related quality of life and self-related health in patients with type 2 diabetes : Effects of group-based rehabilitation versus individual counselling. *Health Qual Life Outcomes* 2011;**9**:110. doi:10.1186/1477-7525-9-110
- 6 Avery L, Flynn D, Van Wersch A, *et al.* Changing physical activity behavior in type 2 diabetes: A systematic review and meta-analysis of behavioral interventions. *Diabetes Care* 2012;**35**:2681–9. doi:10.2337/dc11-2452
- 7 Umpierre D, Kramer CK, Leita CB, *et al.* Physical Activity Advice Only or Structured. *JAMA* 2011;**305**:1790–9.
- 8 Shaw JE, Sicree R a., Zimmet PZ. Global estimates of the prevalence of diabetes for 2010 and 2030. *Diabetes Res Clin Pract* 2010;**87**:4–14. doi:10.1016/j.diabres.2009.10.007
- 9 Whiting DR, Guariguata L, Weil C, *et al.* IDF Diabetes Atlas: Global estimates of the prevalence of diabetes for 2011 and 2030. *Diabetes Res Clin Pract* 2011;**94**:311–21. doi:10.1016/j.diabres.2011.10.029
- 10 Cochrane Collaboration. Special Colection: Health of Indigenous peoples: diabetes. [http://www.cochranelibrary.com/app/content/special-collections/article/?doi=10.1002/\(ISSN\)14651858\(CAT\)Freeaccesstoreviews\(VI\)indigenoushealthdiabetes](http://www.cochranelibrary.com/app/content/special-collections/article/?doi=10.1002/(ISSN)14651858(CAT)Freeaccesstoreviews(VI)indigenoushealthdiabetes). 2015.
- 11 Policy EHealth, Europa.eu.
- 12 Di Loreto C, Fanelli C, Lucidi P, *et al.* Make Your Diabetic Patients Walk. *Diabetes Care* 2005;**28**:1295–302. doi:10.2337/diacare.28.6.1295

- 1  
2  
3  
4  
5  
6  
7  
8  
9  
10  
11  
12  
13  
14  
15  
16  
17  
18  
19  
20  
21  
22  
23  
24  
25  
26  
27  
28  
29  
30  
31  
32  
33  
34  
35  
36  
37  
38  
39  
40  
41  
42  
43  
44  
45  
46  
47  
48  
49  
50  
51  
52  
53  
54  
55  
56  
57  
58  
59  
60
- 13 Eakin EG, Reeves MM, Lawler SP, *et al.* The Logan Healthy Living Program: A cluster randomized trial of a telephone-delivered physical activity and dietary behavior intervention for primary care patients with type 2 diabetes or hypertension from a socially disadvantaged community - Rationale, d. *Contemp Clin Trials* 2008;**29**:439–54. doi:10.1016/j.cct.2007.10.005
  - 14 Tatara N, Årsand E, Bratteteig T, *et al.* Usage and perceptions of a mobile self-management application for people with type 2 diabetes: Qualitative study of a five-month trial. *Stud Health Technol Inform* 2013;**192**:127–31. doi:10.3233/978-1-61499-289-9-127
  - 15 Karstoft K, Winding K, Knudsen SH, *et al.* The Effects of Free-Living Interval-Walking Training on Glycemic Control, Body Composition, and Physical Fitness in Type 2 Diabetic Patients. *Diabetes Care* 2013;**36**:228–36. doi:10.2337/dc12-0658.
  - 16 Ried-larsen M, Thomsen RW, Berencsi K, *et al.* Implementation of interval walking training in patients with type 2 diabetes in Denmark : rationale , design , and baseline characteristics. *Clinical Epidemiol* 2016;**8**:201–9.
  - 17 Saida, T. Langberg H. *Self-Reported adherence to physical activity following physical activity referral scheme & objective measured physical activity in self-referred subgroup: A pragmatic 12 month follow-up study.* 2014.
  - 18 Ogden J, Hills L. Understanding sustained behavior change: the role of life crises and the process of reinvention. *Health (London)* 2008;**12**:419–37. doi:10.1177/1363459308094417
  - 19 Chan A-W, Tetzlaff JM, Gøtzsche PC, *et al.* SPIRIT 2013 explanation and elaboration: guidance for protocols of clinical trials. *BMJ* 2013;**346**:e7586. doi:10.1136/bmj.e7586
  - 20 Schulz KF, Altman DG, Moher D, *et al.* Academia and Clinic Annals of Internal Medicine CONSORT 2010 Statement : Updated Guidelines for Reporting Parallel Group Randomized Trials OF TO. *Ann Intern Med* 2010;**1996**:727–32. doi:10.7326/0003-4819-152-11-201006010-00232
  - 21 Thomsen RW, Nielsen JS, Ulrichsen SP, *et al.* The Danish Centre for Strategic research in type 2 diabetes (dd2) study: Collection of baseline data from the first 580 patients. *Clin Epidemiol* 2012;**4**:43–8. doi:10.2147/clep.s30083
  - 22 Thygesen LC, Daasnes C, Thaulow I, *et al.* Introduction to Danish (nationwide) registers on health and social issues: Structure, access, legislation, and archiving. *Scand J Public Health* 2011;**39**:12–6. doi:10.1177/1403494811399956
  - 23 Bodenheimer, Thomas. Wagner, Edward H. Grumbach K. Improving Primary Care for Patient With Chronic Illness, The Chonic Care Model, Part 2. *JAMA - J Am Med Assoc* 2002;**288**:1909–14.

## Effect of Interval walking on type 2 diabetics

BMJ Open

- 1  
2  
3  
4  
5  
6  
7  
8  
9 24 Pedersen BK, Saltin B. Evidence for prescribing exercise as therapy in chronic  
10 disease. *Insulin* 2006;**16**:3–63. doi:10.1111/j.1600-0838.2006.00520.x
- 11 25 Brinkloeve, Cecilie Fau. Thorsen, Ida Kær. Karstoft, Kristian. Brøns, Charlotte.  
12 Valentiner, Laura. Langberg, Henning. Vaag, Allan Arthur, Nielsen, Jens Steen.  
13 Pedersen, Bente Klarlund. Ried-Larsen M. Criterion validity and reliability of a  
14 smartphone delivered sub-maximal fitness test for people with type 2 diabetes.  
15 *Submitt 2016*
- 16 26 Miller, WR. Rollnick S. *Motivational Interviewing: Preparing People for Change*.  
17 2nd. New York, NY: Guilford Press 2002.
- 18 27 Chen SM, Creedy D, Lin H-S, *et al*. Effects of motivational interviewing intervention  
19 on self-management, psychological and glycemic outcomes in type 2 diabetes: A  
20 randomized controlled trial. *Int J Nurs Stud* 2012;**49**:637–44.  
21 doi:10.1016/j.ijnurstu.2011.11.011
- 22 28 Locke EA. Toward a Theory of Task Motivation and Incentives 1. *Organ Behav Hum*  
23 *Perform* 1968;**189**:157–89.
- 24 29 Locke EA, Latham GP. New Directions in Goal-Setting Theory. *SAGE* 2006;**15**:265–  
25 8.
- 26 30 Fjeldsoe BS, Marshall AL, Miller YD. Behavior Change Interventions Delivered by  
27 Mobile Telephone Short-Message Service. *Am J Prev Med* 2009;**36**:165–73.  
28 doi:10.1016/j.amepre.2008.09.040
- 29 31 Kongstad, Malte Bue. Valentiner, Laura Staun. Ried-Larsen, Mathias. Walker, Karen  
30 Christina. Juhl, Carsten Bogh. Langberg H. Effectiveness of remote feedback on  
31 physical activity in patients with type 2 diabetes: a systematic review and meta-  
32 analysis of randomized controlled trials. *Submitt 2016*
- 33 32 Ryan R, Deci E. Intrinsic and Extrinsic Motivations: Classic Definitions and New  
34 Directions. *Contemp Educ Psychol* 2000;**25**:54–67. doi:10.1006/ceps.1999.1020
- 35 33 Shaya T. F, Chirikov V. V, Howard D, *et al*. Effect of social networks intervention  
36 in type 2 diabetes: a partial randomised study. *J Epidemiol Community Heal*  
37 2014;**68**:326–32. doi:10.1136/jech-2013-203274
- 38 34 Paul G, Keogh K, D'Eath M, *et al*. Implementing a peer-support intervention for  
39 people with type 2 diabetes: A qualitative study. *Fam Pract* 2013;**30**:593–603.  
40 doi:10.1093/fampra/cmt027
- 41 35 Drivsholm, Thomas Bo. Snorgaard O. Organisation of treatment and follow up of  
42 patients with type 2 diabetes. *J Danish Med Assoc* 2012;**174**:2159–62.
- 43 36 Snowling NJ, Hopkins WG. Reviews / Commentaries / ADA Statements Effects of  
44 Different Modes of Exercise Training on Glucose Control and Risk Factors for  
45  
46  
47  
48  
49  
50  
51  
52  
53  
54  
55  
56  
57  
58  
59  
60

- 1  
2  
3  
4  
5  
6  
7  
8  
9  
10  
11  
12  
13  
14  
15  
16  
17  
18  
19  
20  
21  
22  
23  
24  
25  
26  
27  
28  
29  
30  
31  
32  
33  
34  
35  
36  
37  
38  
39  
40  
41  
42  
43  
44  
45  
46  
47  
48  
49  
50  
51  
52  
53  
54  
55  
56  
57  
58  
59  
60
- Complications in Type 2. *Diabetes Care* 2006;**29**:2518–27. doi:10.2337/dc06-1317
- 37 Ajala O, English P, Pinkney J. Systematic review and meta-analysis of different dietary approaches to the management of type 2 diabetes 1 – 3. *Am J Clin Nutr* 2013;**97**:505–16. doi:10.3945/ajcn.112.042457.Am
- 38 Evert AB, Boucher JL, Marjorie C, *et al.* Nutrition Therapy Recommendations for the Management of Adults With Diabetes. *Diabetes Care* 2013;**36**:3821–42. doi:10.2337/dc13-2042
- 39 Palmer SC, Mavridis D, Nicolucci A, *et al.* Comparison of Clinical Outcomes and Adverse Events Associated With Glucose-Lowering Drugs in Patients With Type 2 Diabetes: A Meta-analysis. *JAMA* 2016;**316**:313–24. doi:10.1001/jama.2016.9400
- 40 Jensen, Natasja K. Christensen, Karl B. Mortensen Erik L. Valentiner, Laura S. Langberg H. Validation of the Behavioral Regulation for Exercise Questionnaire in Danish: measuring of motivation for exercise in people living with diabetes. *Prep* 2016.
- 41 Valentiner, Laura Staun. Egerod, Ingrid. Molin, Katrine Rutkær. Bahari-Bandari, Samareh. Langberg H. Patients with type 2 diabetes choose quality of life over health: a focus group investigation. *Submitt 2016*
- 42 Ware, John E, Kosinski Mark KS. A 12-Item Short-Form Health Survey: COConstruction of Scales and Preliminary Tests of Reliability and Validity. *Med Care* 1996;**34**(3):220–33.
- 43 Gardner B. A review and analysis of the use of “habit” in understanding, predicting and influencing health-related behaviour. *Health Psychol Rev* 2014;:1–19. doi:10.1080/17437199.2013.876238
- 44 Gardner B, Abraham C, Lally P, *et al.* Towards parsimony in habit measurement: Testing the convergent and predictive validity of an automaticity subscale of the Self-Report Habit Index. *Int J Behav Nutr Phys Act* 2012;**9**:102. doi:10.1186/1479-5868-9-102
- 45 Jones CJ, Rikli RE, Beam WC. A 30-s Chair-Stand Test as a Measure of Lower Body Strength in Community-Residing Older Adults. *Res Q Exerc Sport* 1999;**70**:113–9. doi:10.1080/02701367.1999.10608028
- 46 Golubic R, May AM, Benjaminsen Borch K, *et al.* Validity of Electronically Administered Recent Physical Activity Questionnaire (RPAQ) in Ten European Countries. *PLoS One* 2014;**9**:e92829. doi:10.1371/journal.pone.0092829
- 47 Mortensen EL, Flensburg-Madsen T, Molbo D, *et al.* Personality in Late Midlife: Associations With Demographic Factors and Cognitive Ability. *J Aging Health* 2014;**26**:21–36. doi:10.1177/0898264313519317

## Effect of Interval walking on type 2 diabetics

BMJ Open

- 1  
2  
3  
4  
5  
6  
7  
8  
9  
10  
11  
12  
13  
14  
15  
16  
17  
18  
19  
20  
21  
22  
23  
24  
25  
26  
27  
28  
29  
30  
31  
32  
33  
34  
35  
36  
37  
38  
39  
40  
41  
42  
43  
44  
45  
46  
47  
48  
49  
50  
51  
52  
53  
54  
55  
56  
57  
58  
59  
60
- 48 Zuckerman M, Kolin EA, Price L, *et al.* DEVELOPMENT OF A SENSATION-SEEKING SCALE x. 1964;**28**:477–82.
- 49 Kirk A, Mutrie N, MacIntyre P, *et al.* Effects of a 12-month activity counselling intervention on glycaemic control and on the status of cardiovascular risk factors in people with Type 2 diabetes. *Diabetologia*. 2004;**47**:821–32. doi:10.1007/s00125-004-1396-5
- 50 De Greef K, Deforche B, Tudor-Locke C, *et al.* A cognitive-behavioural pedometer-based group intervention on physical activity and sedentary behaviour in individuals with type 2 diabetes. *Health Educ Res* 2010;**25**:724–36.<http://ovidsp.ovid.com/ovidweb.cgi?T=JS&PAGE=reference&D=psyc7&NEWS=N&AN=2010-18970-002>
- 51 Savovic J, Jones HE, Altman DG, *et al.* Influence of reported study design characteristics on intervention effect estimates from randomized, controlled trials. *Ann Intern Med* 2012;**157**:429–38. doi:10.7326/0003-4819-157-6-201209180-00537
- 52 Wood L, Egger M, Gluud LL, *et al.* Empirical evidence of bias in treatment effect estimates in controlled trials with different interventions and outcomes: meta-epidemiological study. *Bmj* 2008;**336**:601–5. doi:10.1136/bmj.39465.451748.AD
- 53 Gluud LL. Bias in clinical intervention research. *Am J Epidemiol* 2006;**163**:493–501. doi:10.1093/aje/kwj069
- 54 World Medical Association. World Medical Association Declaration of Helsinki: Ethical Principles for Medical Research Involving Human Subjects. *Clin Rev* 2013;**6**–9.



**FIGURE LEGENDS****Figure 1.** Timeline and overview of interventions in the InterWalk trial

Phase one shows baseline-test, randomization, intervention and test after intervention. Phase two shows the re-allocation of patients in the experimental group who do Interval Walking Training (IWT with the InterWalk app to either IWT with or without motivational support form a health professional. All patients are tested at baseline, after intervention and again at follow-up at 52 weeks

**Figure 2.** Flow-chart, The InterWalk-RCT Trial

**Figure 3.** The InterWalk front page (A), Protocol for the fitness test in the application (B), The start page for interval walking showing smileys as direct feedback to the user (C) (translated from Danish).[16]

**Figure 4.** Short Message Service (SMS), send every Sunday to patients in the IWTsupport-group

**Figure 5.** Short Message Service (SMS), Standardized walking test in the InterWalk application, send every fourth week to patients in the IWTsupport-group

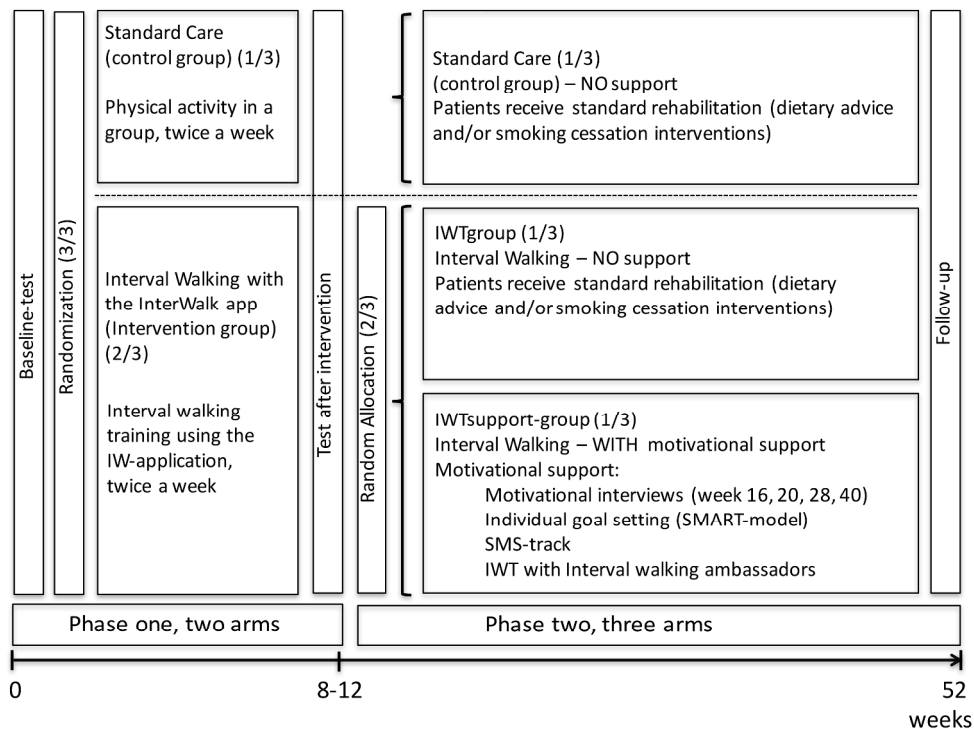

Figure 1. Timeline and overview of interventions in the InterWalk trial  
 Phase one shows baseline-test, randomisation, intervention and test after intervention. Phase two shows the re-allocation of patients in the experimental group who do Interval Walking Training (IWT with the InterWalk app to either IWT with or without motivational support form a health professional. All patients are tested at baseline, after intervention and again at follow-up at 52 weeks

254x190mm (300 x 300 DPI)

only

1  
2  
3  
4  
5  
6  
7  
8  
9  
10  
11  
12  
13  
14  
15  
16  
17  
18  
19  
20  
21  
22  
23  
24  
25  
26  
27  
28  
29  
30  
31  
32  
33  
34  
35  
36  
37  
38  
39  
40  
41  
42  
43  
44  
45  
46  
47  
48  
49  
50  
51  
52  
53  
54  
55  
56  
57  
58  
59  
60

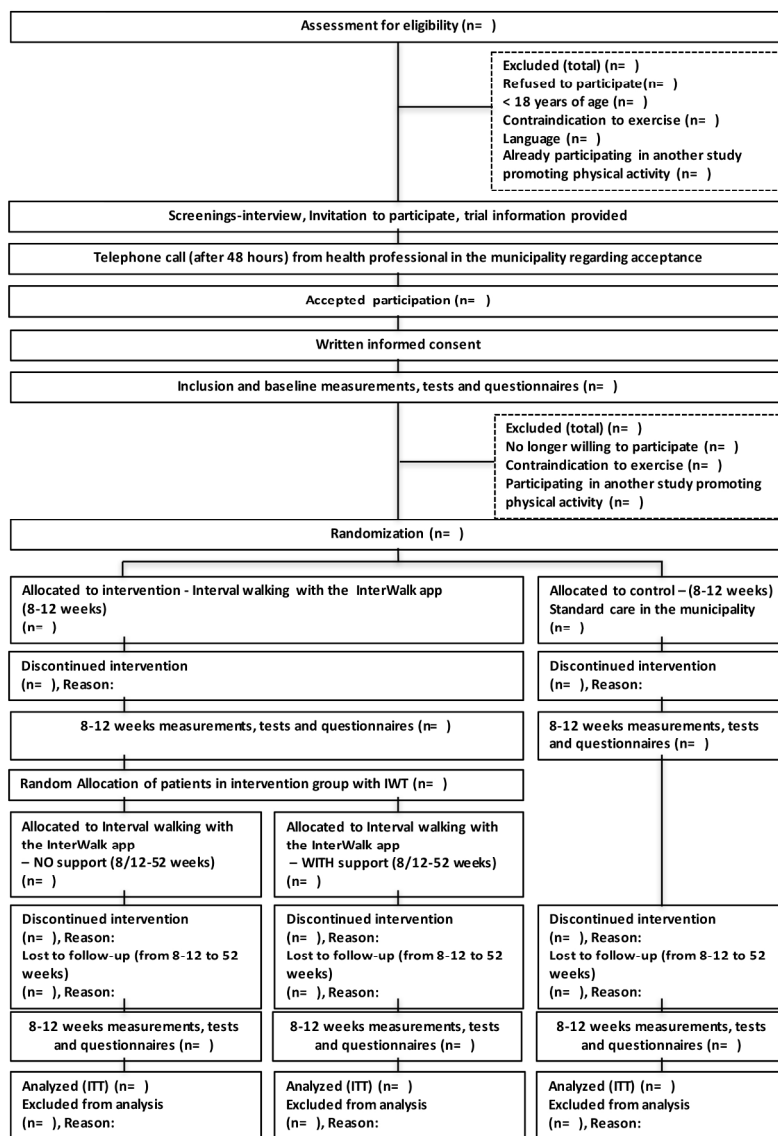

Figure 2. Flowchart, The InterWalk-RCT Trial

190x254mm (300 x 300 DPI)

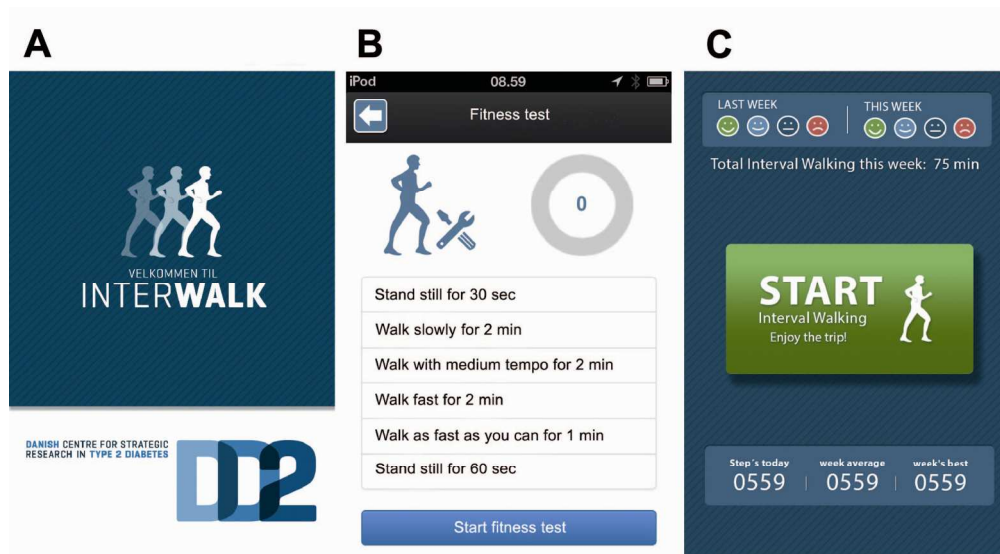

Figure 3. The InterWalk front page (A), Protocol for the fitness test in the application (B), The start page for interval walking showing smileys as direct feedback to the user (C) (translated from Danish).[16]

725x399mm (72 x 72 DPI)

review only

1  
2  
3  
4  
5  
6  
7  
8  
9  
10  
11  
12  
13  
14  
15  
16  
17  
18  
19  
20  
21  
22  
23  
24  
25  
26  
27  
28  
29  
30  
31  
32  
33  
34  
35  
36  
37  
38  
39  
40  
41  
42  
43  
44  
45  
46  
47  
48  
49  
50  
51  
52  
53  
54  
55  
56  
57  
58  
59  
60

1  
2  
3  
4  
5  
6  
7  
8  
9  
10  
11  
12  
13  
14  
15  
16  
17  
18  
19  
20  
21  
22  
23  
24  
25  
26  
27  
28  
29  
30  
31  
32  
33  
34  
35  
36  
37  
38  
39  
40  
41  
42  
43  
44  
45  
46  
47  
48  
49  
50  
51  
52  
53  
54  
55  
56  
57  
58  
59  
60

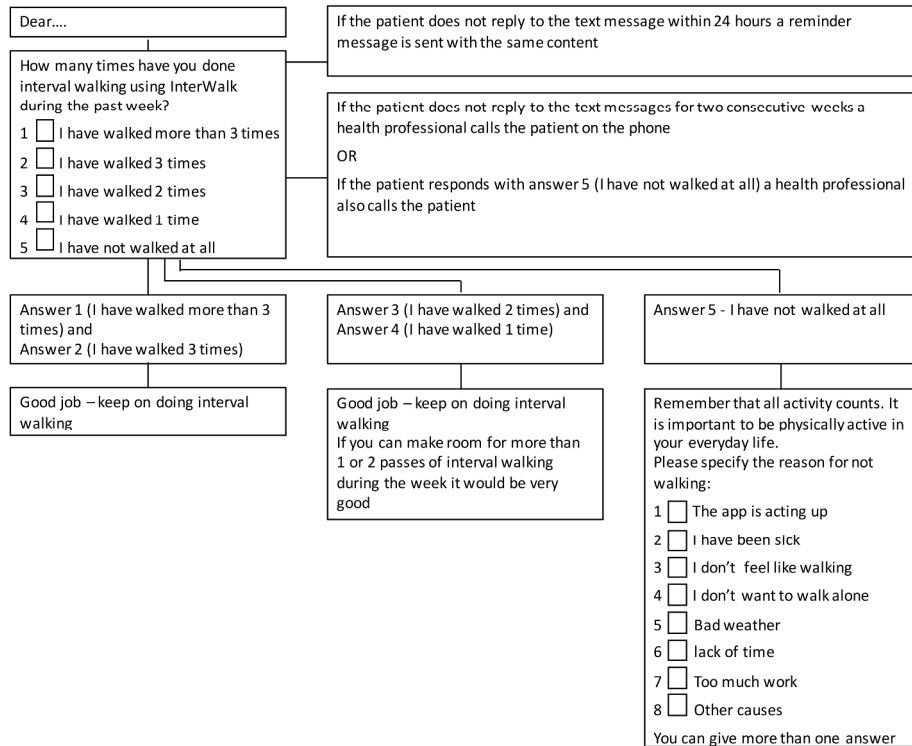

Figure 4. Short Message Service (SMS), send every Sunday to patients in the IWTsupport-group

254x190mm (300 x 300 DPI)

Peer Review Only

Short Message Service (SMS)  
Standardized Walking test in the InterWalk application

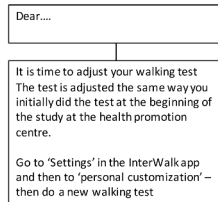

Figure 5. Short Message Service (SMS), Standardized walking test in the InterWalk application, send every fourth week to patients in the IWTsupport-group

338x190mm (300 x 300 DPI)



To BMJ Open

As the senior author of the published paper "*Implementation of interval walking training in patients with type 2 diabetes in Denmark: rationale, design, and baseline characteristics*" I hereby approve the use figure A, B and C in paper "*The long-term effect of smartphone-delivered Interval Walking Training on physical activity in patients with type 2 diabetes: protocol for a parallel group single-blinded randomized controlled trial*" submitted to BMJ Open by Laura Valentiner.

Original publication of the figures:

"*Implementation of interval walking training in patients with type 2 diabetes in Denmark: rationale, design, and baseline characteristics*. Ried-Larsen M, Thomsen RW, Berencsi K, Brinkløv CF, Brøns C, Valentiner LS, Karstoft K, Langberg H, Vaag AA, Pedersen BK, Nielsen JS. Clin Epidemiol. 2016 Jun 8;8:201-9. doi: 10.2147/CLEP.S97303. eCollection 2016."

Kind regards

PhD Jens Steen Nielsen

2016-08-17

A handwritten signature in blue ink, appearing to read 'Jens Steen Nielsen', with a long horizontal stroke extending to the right.

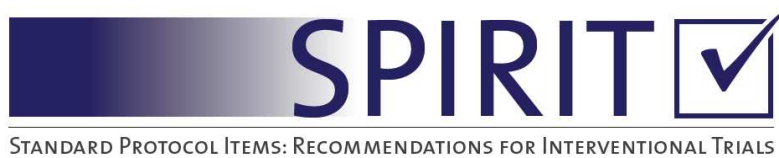

SPIRIT 2013 Checklist: Recommended items to address in a clinical trial protocol and related documents\*

| Section/Item                                              | ItemNo | Description                                                                                                                                                                                                                                                                              | Page                         |
|-----------------------------------------------------------|--------|------------------------------------------------------------------------------------------------------------------------------------------------------------------------------------------------------------------------------------------------------------------------------------------|------------------------------|
| <b>Administrative information</b>                         |        |                                                                                                                                                                                                                                                                                          |                              |
| Title                                                     | 1      | Descriptive title identifying the study design, population, interventions, and, if applicable, trial acronym                                                                                                                                                                             | 1                            |
| Trial registration                                        | 2a     | Trial identifier and registry name. If not yet registered, name of intended registry                                                                                                                                                                                                     | 2 & 5                        |
|                                                           | 2b     | All items from the World Health Organization Trial Registration Data Set                                                                                                                                                                                                                 | 4, 31, 1, 5, 7-22, 6, 26, 23 |
| Protocol version                                          | 3      | Date and version identifier                                                                                                                                                                                                                                                              | N/A                          |
| Funding                                                   | 4      | Sources and types of financial, material, and other support                                                                                                                                                                                                                              | 33                           |
| Roles and responsibilities                                | 5a     | Names, affiliations, and roles of protocol contributors                                                                                                                                                                                                                                  | 33                           |
|                                                           | 5b     | Name and contact information for the trial sponsor                                                                                                                                                                                                                                       | N/A                          |
|                                                           | 5c     | Role of study sponsor and funders, if any, in study design; collection, management, analysis, and interpretation of data; writing of the report; and the decision to submit the report for publication, including whether they will have ultimate authority over any of these activities | N/A                          |
|                                                           | 5d     | Composition, roles, and responsibilities of the coordinating centre, steering committee, endpoint adjudication committee, data management team, and other individuals or groups overseeing the trial, if applicable (see Item 21a for data monitoring committee)                         | 7, 16, 17, 31                |
| <b>Introduction</b>                                       |        |                                                                                                                                                                                                                                                                                          |                              |
| Background and rationale                                  | 6a     | Description of research question and justification for undertaking the trial, including summary of relevant studies (published and unpublished) examining benefits and harms for each intervention                                                                                       | 3, 7-22                      |
|                                                           | 6b     | Explanation for choice of comparators                                                                                                                                                                                                                                                    | 4, 16, 29                    |
| Objectives                                                | 7      | Specific objectives or hypotheses                                                                                                                                                                                                                                                        | 4                            |
| Trial design                                              | 8      | Description of trial design including type of trial (eg, parallel group, crossover, factorial, single group), allocation ratio, and framework (eg, superiority, equivalence, noninferiority, exploratory)                                                                                | 4                            |
| <b>Methods: Participants, interventions, and outcomes</b> |        |                                                                                                                                                                                                                                                                                          |                              |
| Study setting                                             | 9      | Description of study settings (eg, community clinic, academic hospital) and list of countries where data will be collected. Reference to where list of study sites can be obtained                                                                                                       | 4                            |
| Eligibility criteria                                      | 10     | Inclusion and exclusion criteria for participants. If applicable, eligibility criteria for study centres and individuals who will perform the interventions (eg, surgeons, psychotherapists)                                                                                             | 5, 6                         |



|    |                      |     |                                                                                                                                                                                                                                                                                                                                                                                |           |
|----|----------------------|-----|--------------------------------------------------------------------------------------------------------------------------------------------------------------------------------------------------------------------------------------------------------------------------------------------------------------------------------------------------------------------------------|-----------|
| 1  |                      |     |                                                                                                                                                                                                                                                                                                                                                                                |           |
| 2  | Interventions        | 11a | Interventions for each group with sufficient detail to allow replication, including how and when they will be administered                                                                                                                                                                                                                                                     | 5-22      |
| 3  |                      |     |                                                                                                                                                                                                                                                                                                                                                                                |           |
| 4  |                      |     |                                                                                                                                                                                                                                                                                                                                                                                |           |
| 5  |                      | 11b | Criteria for discontinuing or modifying allocated interventions for a given trial participant (eg, drug dose change in response to harms, participant request, or improving/worsening disease)                                                                                                                                                                                 | 14, 21    |
| 6  |                      |     |                                                                                                                                                                                                                                                                                                                                                                                |           |
| 7  |                      |     |                                                                                                                                                                                                                                                                                                                                                                                |           |
| 8  |                      |     |                                                                                                                                                                                                                                                                                                                                                                                |           |
| 9  |                      | 11c | Strategies to improve adherence to intervention protocols, and any procedures for monitoring adherence (eg, drug tablet return, laboratory tests)                                                                                                                                                                                                                              | 12, 14    |
| 10 |                      |     |                                                                                                                                                                                                                                                                                                                                                                                |           |
| 11 |                      |     |                                                                                                                                                                                                                                                                                                                                                                                |           |
| 12 |                      | 11d | Relevant concomitant care and interventions that are permitted or prohibited during the trial                                                                                                                                                                                                                                                                                  | 14        |
| 13 |                      |     |                                                                                                                                                                                                                                                                                                                                                                                |           |
| 14 | Outcomes             | 12  | Primary, secondary, and other outcomes, including the specific measurement variable (eg, systolic blood pressure), analysis metric (eg, change from baseline, final value, time to event), method of aggregation (eg, median, proportion), and time point for each outcome. Explanation of the clinical relevance of chosen efficacy and harm outcomes is strongly recommended | 23        |
| 15 |                      |     |                                                                                                                                                                                                                                                                                                                                                                                |           |
| 16 |                      |     |                                                                                                                                                                                                                                                                                                                                                                                |           |
| 17 |                      |     |                                                                                                                                                                                                                                                                                                                                                                                |           |
| 18 |                      |     |                                                                                                                                                                                                                                                                                                                                                                                |           |
| 19 |                      |     |                                                                                                                                                                                                                                                                                                                                                                                |           |
| 20 |                      |     |                                                                                                                                                                                                                                                                                                                                                                                |           |
| 21 | Participant timeline | 13  | Time schedule of enrolment, interventions (including any run-ins and washouts), assessments, and visits for participants. A schematic diagram is highly recommended (see Figure)                                                                                                                                                                                               | 5, 24, 27 |
| 22 |                      |     |                                                                                                                                                                                                                                                                                                                                                                                |           |
| 23 |                      |     |                                                                                                                                                                                                                                                                                                                                                                                |           |
| 24 |                      |     |                                                                                                                                                                                                                                                                                                                                                                                |           |
| 25 | Sample size          | 14  | Estimated number of participants needed to achieve study objectives and how it was determined, including clinical and statistical assumptions supporting any sample size calculations                                                                                                                                                                                          | 25        |
| 26 |                      |     |                                                                                                                                                                                                                                                                                                                                                                                |           |
| 27 |                      |     |                                                                                                                                                                                                                                                                                                                                                                                |           |
| 28 |                      |     |                                                                                                                                                                                                                                                                                                                                                                                |           |
| 29 | Recruitment          | 15  | Strategies for achieving adequate participant enrolment to reach target sample size                                                                                                                                                                                                                                                                                            | 4         |
| 30 |                      |     |                                                                                                                                                                                                                                                                                                                                                                                |           |

#### Methods: Assignment of interventions (for controlled trials)

##### Allocation:

|    |                                  |     |                                                                                                                                                                                                                                                                                                                                                          |    |
|----|----------------------------------|-----|----------------------------------------------------------------------------------------------------------------------------------------------------------------------------------------------------------------------------------------------------------------------------------------------------------------------------------------------------------|----|
| 31 |                                  |     |                                                                                                                                                                                                                                                                                                                                                          |    |
| 32 |                                  |     |                                                                                                                                                                                                                                                                                                                                                          |    |
| 33 |                                  |     |                                                                                                                                                                                                                                                                                                                                                          |    |
| 34 |                                  |     |                                                                                                                                                                                                                                                                                                                                                          |    |
| 35 | Sequence generation              | 16a | Method of generating the allocation sequence (eg, computer-generated random numbers), and list of any factors for stratification. To reduce predictability of a random sequence, details of any planned restriction (eg, blocking) should be provided in a separate document that is unavailable to those who enrol participants or assign interventions | 27 |
| 36 |                                  |     |                                                                                                                                                                                                                                                                                                                                                          |    |
| 37 |                                  |     |                                                                                                                                                                                                                                                                                                                                                          |    |
| 38 |                                  |     |                                                                                                                                                                                                                                                                                                                                                          |    |
| 39 |                                  |     |                                                                                                                                                                                                                                                                                                                                                          |    |
| 40 |                                  |     |                                                                                                                                                                                                                                                                                                                                                          |    |
| 41 | Allocation concealment mechanism | 16b | Mechanism of implementing the allocation sequence (eg, central telephone; sequentially numbered, opaque, sealed envelopes), describing any steps to conceal the sequence until interventions are assigned                                                                                                                                                | 27 |
| 42 |                                  |     |                                                                                                                                                                                                                                                                                                                                                          |    |
| 43 |                                  |     |                                                                                                                                                                                                                                                                                                                                                          |    |
| 44 |                                  |     |                                                                                                                                                                                                                                                                                                                                                          |    |
| 45 | Implementation                   | 16c | Who will generate the allocation sequence, who will enrol participants, and who will assign participants to interventions                                                                                                                                                                                                                                | 27 |
| 46 |                                  |     |                                                                                                                                                                                                                                                                                                                                                          |    |
| 47 |                                  |     |                                                                                                                                                                                                                                                                                                                                                          |    |
| 48 | Blinding (masking)               | 17a | Who will be blinded after assignment to interventions (eg, trial participants, care providers, outcome assessors, data analysts), and how                                                                                                                                                                                                                | 28 |
| 49 |                                  |     |                                                                                                                                                                                                                                                                                                                                                          |    |
| 50 |                                  |     |                                                                                                                                                                                                                                                                                                                                                          |    |
| 51 |                                  | 17b | If blinded, circumstances under which unblinding is permissible, and procedure for revealing a participant's allocated intervention during the trial                                                                                                                                                                                                     | 21 |
| 52 |                                  |     |                                                                                                                                                                                                                                                                                                                                                          |    |
| 53 |                                  |     |                                                                                                                                                                                                                                                                                                                                                          |    |

#### Methods: Data collection, management, and analysis

|    |                                 |     |                                                                                                                                                                                                                                                                                                                                                                                                              |        |
|----|---------------------------------|-----|--------------------------------------------------------------------------------------------------------------------------------------------------------------------------------------------------------------------------------------------------------------------------------------------------------------------------------------------------------------------------------------------------------------|--------|
| 1  |                                 |     |                                                                                                                                                                                                                                                                                                                                                                                                              |        |
| 2  | Data collection methods         | 18a | Plans for assessment and collection of outcome, baseline, and other trial data, including any related processes to promote data quality (eg, duplicate measurements, training of assessors) and a description of study instruments (eg, questionnaires, laboratory tests) along with their reliability and validity, if known. Reference to where data collection forms can be found, if not in the protocol | 24     |
| 3  |                                 |     |                                                                                                                                                                                                                                                                                                                                                                                                              |        |
| 4  |                                 |     |                                                                                                                                                                                                                                                                                                                                                                                                              |        |
| 5  |                                 |     |                                                                                                                                                                                                                                                                                                                                                                                                              |        |
| 6  |                                 |     |                                                                                                                                                                                                                                                                                                                                                                                                              |        |
| 7  |                                 |     |                                                                                                                                                                                                                                                                                                                                                                                                              |        |
| 8  |                                 | 18b | Plans to promote participant retention and complete follow-up, including list of any outcome data to be collected for participants who discontinue or deviate from intervention protocols                                                                                                                                                                                                                    | 22     |
| 9  |                                 |     |                                                                                                                                                                                                                                                                                                                                                                                                              |        |
| 10 | Data management                 | 19  | Plans for data entry, coding, security, and storage, including any related processes to promote data quality (eg, double data entry; range checks for data values). Reference to where details of data management procedures can be found, if not in the protocol                                                                                                                                            | 31     |
| 11 |                                 |     |                                                                                                                                                                                                                                                                                                                                                                                                              |        |
| 12 |                                 |     |                                                                                                                                                                                                                                                                                                                                                                                                              |        |
| 13 | Statistical methods             | 20a | Statistical methods for analysing primary and secondary outcomes. Reference to where other details of the statistical analysis plan can be found, if not in the protocol                                                                                                                                                                                                                                     | 28     |
| 14 |                                 |     |                                                                                                                                                                                                                                                                                                                                                                                                              |        |
| 15 |                                 |     |                                                                                                                                                                                                                                                                                                                                                                                                              |        |
| 16 |                                 | 20b | Methods for any additional analyses (eg, subgroup and adjusted analyses)                                                                                                                                                                                                                                                                                                                                     | N/A    |
| 17 |                                 |     |                                                                                                                                                                                                                                                                                                                                                                                                              |        |
| 18 |                                 | 20c | Definition of analysis population relating to protocol non-adherence (eg, as randomised analysis), and any statistical methods to handle missing data (eg, multiple imputation)                                                                                                                                                                                                                              | N/A    |
| 19 |                                 |     |                                                                                                                                                                                                                                                                                                                                                                                                              |        |
| 20 |                                 |     |                                                                                                                                                                                                                                                                                                                                                                                                              |        |
| 21 |                                 |     |                                                                                                                                                                                                                                                                                                                                                                                                              |        |
| 22 |                                 |     |                                                                                                                                                                                                                                                                                                                                                                                                              |        |
| 23 |                                 |     |                                                                                                                                                                                                                                                                                                                                                                                                              |        |
| 24 | <b>Methods: Monitoring</b>      |     |                                                                                                                                                                                                                                                                                                                                                                                                              |        |
| 25 |                                 |     |                                                                                                                                                                                                                                                                                                                                                                                                              |        |
| 26 | Data monitoring                 | 21a | Composition of data monitoring committee (DMC); summary of its role and reporting structure; statement of whether it is independent from the sponsor and competing interests; and reference to where further details about its charter can be found, if not in the protocol. Alternatively, an explanation of why a DMC is not needed                                                                        | 31     |
| 27 |                                 |     |                                                                                                                                                                                                                                                                                                                                                                                                              |        |
| 28 |                                 |     |                                                                                                                                                                                                                                                                                                                                                                                                              |        |
| 29 |                                 |     |                                                                                                                                                                                                                                                                                                                                                                                                              |        |
| 30 |                                 |     |                                                                                                                                                                                                                                                                                                                                                                                                              |        |
| 31 |                                 | 21b | Description of any interim analyses and stopping guidelines, including who will have access to these interim results and make the final decision to terminate the trial                                                                                                                                                                                                                                      | N/A    |
| 32 |                                 |     |                                                                                                                                                                                                                                                                                                                                                                                                              |        |
| 33 |                                 |     |                                                                                                                                                                                                                                                                                                                                                                                                              |        |
| 34 | Harms                           | 22  | Plans for collecting, assessing, reporting, and managing solicited and spontaneously reported adverse events and other unintended effects of trial interventions or trial conduct                                                                                                                                                                                                                            | 21, 31 |
| 35 |                                 |     |                                                                                                                                                                                                                                                                                                                                                                                                              |        |
| 36 |                                 |     |                                                                                                                                                                                                                                                                                                                                                                                                              |        |
| 37 | Auditing                        | 23  | Frequency and procedures for auditing trial conduct, if any, and whether the process will be independent from investigators and the sponsor                                                                                                                                                                                                                                                                  | N/A    |
| 38 |                                 |     |                                                                                                                                                                                                                                                                                                                                                                                                              |        |
| 39 |                                 |     |                                                                                                                                                                                                                                                                                                                                                                                                              |        |
| 40 |                                 |     |                                                                                                                                                                                                                                                                                                                                                                                                              |        |
| 41 | <b>Ethics and dissemination</b> |     |                                                                                                                                                                                                                                                                                                                                                                                                              |        |
| 42 |                                 |     |                                                                                                                                                                                                                                                                                                                                                                                                              |        |
| 43 | Research ethics approval        | 24  | Plans for seeking research ethics committee/institutional review board (REC/IRB) approval                                                                                                                                                                                                                                                                                                                    | 5      |
| 44 |                                 |     |                                                                                                                                                                                                                                                                                                                                                                                                              |        |
| 45 | Protocol amendments             | 25  | Plans for communicating important protocol modifications (eg, changes to eligibility criteria, outcomes, analyses) to relevant parties (eg, investigators, REC/IRBs, trial participants, trial registries, journals, regulators)                                                                                                                                                                             | 5      |
| 46 |                                 |     |                                                                                                                                                                                                                                                                                                                                                                                                              |        |
| 47 |                                 |     |                                                                                                                                                                                                                                                                                                                                                                                                              |        |
| 48 |                                 |     |                                                                                                                                                                                                                                                                                                                                                                                                              |        |
| 49 | Consent or assent               | 26a | Who will obtain informed consent or assent from potential trial participants or authorised surrogates, and how (see Item 32)                                                                                                                                                                                                                                                                                 | 5      |
| 50 |                                 |     |                                                                                                                                                                                                                                                                                                                                                                                                              |        |
| 51 |                                 |     |                                                                                                                                                                                                                                                                                                                                                                                                              |        |
| 52 |                                 | 26b | Additional consent provisions for collection and use of participant data and biological specimens in ancillary studies, if applicable                                                                                                                                                                                                                                                                        | 32     |
| 53 |                                 |     |                                                                                                                                                                                                                                                                                                                                                                                                              |        |
| 54 |                                 |     |                                                                                                                                                                                                                                                                                                                                                                                                              |        |
| 55 | Confidentiality                 | 27  | How personal information about potential and enrolled participants will be collected, shared, and maintained in order to protect confidentiality before, during, and after the trial                                                                                                                                                                                                                         | 31     |
| 56 |                                 |     |                                                                                                                                                                                                                                                                                                                                                                                                              |        |
| 57 |                                 |     |                                                                                                                                                                                                                                                                                                                                                                                                              |        |
| 58 |                                 |     |                                                                                                                                                                                                                                                                                                                                                                                                              |        |
| 59 |                                 |     |                                                                                                                                                                                                                                                                                                                                                                                                              |        |
| 60 |                                 |     |                                                                                                                                                                                                                                                                                                                                                                                                              |        |

|    |                               |     |                                                                                                                                                                                                                                                                                     |     |
|----|-------------------------------|-----|-------------------------------------------------------------------------------------------------------------------------------------------------------------------------------------------------------------------------------------------------------------------------------------|-----|
| 1  |                               |     |                                                                                                                                                                                                                                                                                     |     |
| 2  | Declaration of interests      | 28  | Financial and other competing interests for principal investigators for the overall trial and each study site                                                                                                                                                                       | 33  |
| 3  |                               |     |                                                                                                                                                                                                                                                                                     |     |
| 4  | Access to data                | 29  | Statement of who will have access to the final trial dataset, and disclosure of contractual agreements that limit such access for investigators                                                                                                                                     | 31  |
| 5  |                               |     |                                                                                                                                                                                                                                                                                     |     |
| 6  |                               |     |                                                                                                                                                                                                                                                                                     |     |
| 7  | Ancillary and post-trial care | 30  | Provisions, if any, for ancillary and post-trial care, and for compensation to those who suffer harm from trial participation                                                                                                                                                       | N/A |
| 8  |                               |     |                                                                                                                                                                                                                                                                                     |     |
| 9  |                               |     |                                                                                                                                                                                                                                                                                     |     |
| 10 |                               |     |                                                                                                                                                                                                                                                                                     |     |
| 11 | Dissemination policy          | 31a | Plans for investigators and sponsor to communicate trial results to participants, healthcare professionals, the public, and other relevant groups (eg, via publication, reporting in results databases, or other data sharing arrangements), including any publication restrictions | 31  |
| 12 |                               |     |                                                                                                                                                                                                                                                                                     |     |
| 13 |                               |     |                                                                                                                                                                                                                                                                                     |     |
| 14 |                               |     |                                                                                                                                                                                                                                                                                     |     |
| 15 |                               |     |                                                                                                                                                                                                                                                                                     |     |
| 16 |                               | 31b | Authorship eligibility guidelines and any intended use of professional writers                                                                                                                                                                                                      | 31  |
| 17 |                               |     |                                                                                                                                                                                                                                                                                     |     |
| 18 |                               | 31c | Plans, if any, for granting public access to the full protocol, participant-level dataset, and statistical code                                                                                                                                                                     | N/A |
| 19 |                               |     |                                                                                                                                                                                                                                                                                     |     |
| 20 | <b>Appendices</b>             |     |                                                                                                                                                                                                                                                                                     |     |
| 21 |                               |     |                                                                                                                                                                                                                                                                                     |     |
| 22 | Informed consent materials    | 32  | Model consent form and other related documentation given to participants and authorised surrogates                                                                                                                                                                                  | N/A |
| 23 |                               |     |                                                                                                                                                                                                                                                                                     |     |
| 24 |                               |     |                                                                                                                                                                                                                                                                                     |     |
| 25 | Biological specimens          | 33  | Plans for collection, laboratory evaluation, and storage of biological specimens for genetic or molecular analysis in the current trial and for future use in ancillary studies, if applicable                                                                                      | 32  |
| 26 |                               |     |                                                                                                                                                                                                                                                                                     |     |
| 27 |                               |     |                                                                                                                                                                                                                                                                                     |     |

\*It is strongly recommended that this checklist be read in conjunction with the SPIRIT 2013 Explanation & Elaboration for important clarification on the items. Amendments to the protocol should be tracked and dated. The SPIRIT checklist is copyrighted by the SPIRIT Group under the Creative Commons "[Attribution-NonCommercial-NoDerivs 3.0 Unported](https://creativecommons.org/licenses/by-nc-nd/3.0/)" license.

# BMJ Open

## The long-term effect of smartphone-delivered Interval Walking Training on physical activity in patients with type 2 diabetes: protocol for a parallel group single-blinded randomized controlled trial

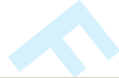

|                                 |                                                                                                                                                                                                                                                                                                                                                                                                                                                                                                                                                                                                                                                                                                                                                                                                                                                                                                                                                                                                                                                                                                                                                                                                                                                                                                       |
|---------------------------------|-------------------------------------------------------------------------------------------------------------------------------------------------------------------------------------------------------------------------------------------------------------------------------------------------------------------------------------------------------------------------------------------------------------------------------------------------------------------------------------------------------------------------------------------------------------------------------------------------------------------------------------------------------------------------------------------------------------------------------------------------------------------------------------------------------------------------------------------------------------------------------------------------------------------------------------------------------------------------------------------------------------------------------------------------------------------------------------------------------------------------------------------------------------------------------------------------------------------------------------------------------------------------------------------------------|
| Journal:                        | <i>BMJ Open</i>                                                                                                                                                                                                                                                                                                                                                                                                                                                                                                                                                                                                                                                                                                                                                                                                                                                                                                                                                                                                                                                                                                                                                                                                                                                                                       |
| Manuscript ID                   | bmjopen-2016-014036.R2                                                                                                                                                                                                                                                                                                                                                                                                                                                                                                                                                                                                                                                                                                                                                                                                                                                                                                                                                                                                                                                                                                                                                                                                                                                                                |
| Article Type:                   | Protocol                                                                                                                                                                                                                                                                                                                                                                                                                                                                                                                                                                                                                                                                                                                                                                                                                                                                                                                                                                                                                                                                                                                                                                                                                                                                                              |
| Date Submitted by the Author:   | 13-Feb-2017                                                                                                                                                                                                                                                                                                                                                                                                                                                                                                                                                                                                                                                                                                                                                                                                                                                                                                                                                                                                                                                                                                                                                                                                                                                                                           |
| Complete List of Authors:       | <p>Valentiner, Laura; University of Copenhagen, CopenRehab, Department of Public Health, Section of Social Medicine, Henrik Pontoppidans Vej 6; Copenhagen University Hospital, Center for Physical Activity Research, Blegdamsvej 9, DK-2100</p> <p>Ried-Larsen, Mathias; Copenhagen University Hospital, Center for Physical Activity Research</p> <p>Karstoft, Kristian; Copenhagen University Hospital, Center for Physical Activity Research; Rigshospitalet, University of Copenhagen, Brinkløv, Cecilie; Copenhagen University Hospital, Center for Physical Activity Research Blegdamsvej 9 Copenhagen, DK 2100</p> <p>Brøns, Charlotte; Copenhagen University Hospital, Center for Physical Activity Research</p> <p>Nielsen, Rasmus; Copenhagen University Hospital, Center for Physical Activity Research</p> <p>Christensen, Robin; Frederiksberg and Bispebjerg Hospital, Parker Institute</p> <p>Nielsen, Jens; Department of Endocrinology (Diabetes and Metabolism), Rigshospitalet, University of Copenhagen</p> <p>Vaag, Allan</p> <p>Pedersen, Bente; Copenhagen University Hospital, Center for Physical Activity Research</p> <p>Langberg, Henning; CopenRehab, Department of Public Health, Section of Social Medicine, Henrik Pontoppidans Vej 6, University of Copenhagen</p> |
| <b>Primary Subject Heading</b>: | Diabetes and endocrinology                                                                                                                                                                                                                                                                                                                                                                                                                                                                                                                                                                                                                                                                                                                                                                                                                                                                                                                                                                                                                                                                                                                                                                                                                                                                            |
| Secondary Subject Heading:      | Diabetes and endocrinology, Sports and exercise medicine, Rehabilitation medicine, Evidence based practice                                                                                                                                                                                                                                                                                                                                                                                                                                                                                                                                                                                                                                                                                                                                                                                                                                                                                                                                                                                                                                                                                                                                                                                            |
| Keywords:                       | Type 2 diabetes, Rehabilitation, Interval Walking Training, Physical Activity, Behaviour maintenance                                                                                                                                                                                                                                                                                                                                                                                                                                                                                                                                                                                                                                                                                                                                                                                                                                                                                                                                                                                                                                                                                                                                                                                                  |
|                                 |                                                                                                                                                                                                                                                                                                                                                                                                                                                                                                                                                                                                                                                                                                                                                                                                                                                                                                                                                                                                                                                                                                                                                                                                                                                                                                       |

SCHOLARONE™  
Manuscripts

**TITLE:**

The long-term effect of smartphone-delivered Interval Walking Training on physical activity in patients with type 2 diabetes: protocol for a parallel group single-blinded randomized controlled trial

**CORRESPONDING AUTHOR:**

Laura Staun Valentiner, Department of Public Health, Section of Social Medicine, CopenRehab, University of Copenhagen, Henrik Pontoppidans Vej 6, 2200 Copenhagen, Denmark

Phone: +45 51173649

Email: [lauravalentiner@gmail.com](mailto:lauravalentiner@gmail.com)

**RUNNING HEAD**

Effect of Interval Walking on Type 2 Diabetics

**BRIEF TITLE:**

The InterWalk Trial

**AUTHORS:**

Laura Staun Valentiner<sup>1,2</sup> ([lava@sund.ku.dk](mailto:lava@sund.ku.dk))

## Effect of Interval walking on type 2 diabetics

BMJ Open

Mathias Ried-Larsen<sup>2,3,4</sup> ([mathias.ried-larsen@regionh.dk](mailto:mathias.ried-larsen@regionh.dk))

Kristian Karstoft<sup>2,4</sup> ([kristian.karstoft@regionh.dk](mailto:kristian.karstoft@regionh.dk))

Cecilie Fau Brinkløv<sup>2,4</sup> ([cecilie.fau.brinkloev@regionh.dk](mailto:cecilie.fau.brinkloev@regionh.dk))

Charlotte Brøns<sup>2,7</sup> ([charlotte.broens@regionh.dk](mailto:charlotte.broens@regionh.dk))

Rasmus Oestergaard Nielsen<sup>1,2</sup> ([roen@ph.au.dk](mailto:roen@ph.au.dk))

Robin Christensen<sup>5</sup> ([robin.christensen@regionh.dk](mailto:robin.christensen@regionh.dk))

Jens Steen Nielsen<sup>6,8</sup> ([jsn@rsyd.dk](mailto:jsn@rsyd.dk))

Allan Arthur Vaag<sup>2,3,4</sup> ([allan.vaag@astrazeneca.com](mailto:allan.vaag@astrazeneca.com))

Bente Klarlund Pedersen<sup>2,4</sup> ([bente.klarlund.pedersen@regionh.dk](mailto:bente.klarlund.pedersen@regionh.dk))

Henning Langberg<sup>1,2</sup> ([langberg@sund.ku.dk](mailto:langberg@sund.ku.dk))

1. CopenRehab, Department of Public Health, Section of Social Medicine, Henrik Pontoppidans Vej 6, University of Copenhagen, 2200 Copenhagen, Denmark
2. Center for Physical Activity Research, Department of Infectious Diseases, Rigshospitalet, University of Copenhagen, Blegdamsvej 9, 2100 Copenhagen, Denmark
3. The Danish Diabetes Academy, Odense University Hospital, Sdr. Boulevard 29, Entrance 112, 3rd floor, 5000 Odense, Denmark
4. Centre of Inflammation and Metabolism, Department of Infectious Diseases, Rigshospitalet, University of Copenhagen, Blegdamsvej 9, 2100 Copenhagen, Denmark

5. Musculoskeletal Statistics Unit, The Parker Institute, Bispebjerg and Frederiksberg Hospital, The Capital Region of Denmark, Denmark
6. Department of Endocrinology, Odense University Hospital, Sdr. Boulevard 29, Entrance 112, 3rd floor, 5000 Odense, Denmark
7. Department of Endocrinology (Diabetes and Metabolism), Rigshospitalet, University of Copenhagen, Denmark
8. OPEN, Odense Patient data Explorative Network, Odense University Hospital, Odense, Denmark.

**TOTAL NUMBER OF WORDS:**

6785

**ABSTRACT:****Introduction**

Physical activity is a cornerstone in Type 2 diabetes (T2D) rehabilitation. Effective long-term and low-cost strategies to keep these patients' physically active are needed. However, maintaining physical activity behaviour is difficult once formalised interventions end. Structured exercise training supported by mobile technology and remote feedback is potentially an effective strategy.

The objective of the trial is to investigate whether mobile health support using the InterWalk application for smartphones is effective in increasing physical activity levels in persons with T2D over time compared to standard care.

We investigate whether Interval Walking Training (IWT) using the InterWalk application is superior to Danish municipality-based rehabilitation in increasing moderate-and-vigorous physical activity levels in patients with T2D across 52 weeks. Secondary, we hypothesize that a motivational programme added from end of intervention to 52-weeks further increases level of physical activity in everyday life in patients with T2D.

**Methods and analysis**

The trial is a parallel-group, open-labelled, randomised controlled trial with long-term follow-up at 52-week including patients with T2D. The primary outcome is change in moderate-and-vigorous physical activity. The key secondary outcome includes motivation for physical activity behaviour change. Other secondary outcomes are  $VO_2$ -peak, strength in



1  
2  
3  
4  
5  
6  
7  
8  
9 the lower extremities. Exclusion criterion is medical contraindication to exercise. We  
10 include up to 246 patients and randomly allocate them into a control (standard group) or an  
11 experimental group (8-12 weeks of IWT supported by the smartphone-based InterWalk  
12 application) in a 1:2 fashion. After intervention, the experimental group is randomly  
13 allocated into two follow-up conditions with unsupervised IWT with or without motivational  
14 support until 52-week follow-up. The Intention-To-Treat principle is applied.  
15  
16  
17  
18  
19  
20  
21

### 22 **Ethics and Dissemination**

23  
24 The local regional Research Ethics Committee in Denmark (H-1-2014-074) and the Danish  
25 Data Protection Agency (j.nr. 2014-54-0897) have approved the trial. Positive, negative or  
26 inconclusive results will be disseminated in scientific journals and conferences.  
27  
28  
29  
30

31 **Trial registration:** NCT02341690

32  
33 **Keywords:** Type 2 diabetes, Rehabilitation, Interval Walking Training, Physical activity,  
34 Behaviour maintenance  
35  
36  
37  
38  
39

### 40 **STRENGTHS:**

- 41 ○ The trial is the largest of its kind, and meets the criteria for high quality randomized  
42 controlled trials with central randomization and use of valid and reliable measures.  
43
- 44 ○ The trial has a long-term follow-up period of 52-weeks from baseline.  
45  
46  
47  
48  
49  
50  
51  
52  
53  
54  
55  
56  
57  
58  
59  
60

## Effect of Interval walking on type 2 diabetics

BMJ Open

- The trial has high external validity with relevance for the clinical setting as it is performed within clinical practice and includes a limited use of inclusion/exclusion criteria's.

**LIMITS:**

- The trial has several collaborators in the setup which may cause variation in the testing procedures.
- Lack of clinical endpoints e.g. depression and mental health
- The length of the intervention periods varies between the three collaborating municipalities may influence the results of the trial.
- There may be a risk of contamination in the control group as the InterWalk application can be downloaded in App Store.

## INTRODUCTION

Physical activity (PA) is a cornerstone in the clinical care of patients with type 2 diabetes (T2D).[1] PA activity has beneficial effect on glycaemic control and other key metabolic risk factors [2,3], as well as improvements in quality of life.[4,5] Furthermore, supervised long-term PA interventions have proven effective in improving glycaemic control.[2,6] However, experimental evidence does not support the efficiency of advice about physical activity alone.[7] As the number of patients with T2D is estimated to rise to 500 million by 2030 worldwide [8,9] the implementation of structured, long-term and supervised exercise regimes constitutes a large societal challenge and is not feasible. Thus, novel strategies to increase physical activity among patients with T2D are needed.

Smartphones have been used as a tool to register exercise, diet, weight and plasma glucose levels, but the evidence for using a smartphone as an exercise device and a self-management tool in the diabetes care is lacking.[10] However, emerging evidence suggest that eHealth solutions using information and communication technologies [11] can educate and engage patients with T2D in long-term self-management.[12–14] Due to the large ingress and ownership of smartphones, a smartphone-supported approach could prove feasible in increasing physical activity among patients with T2D and accommodate the increasing prevalence of T2D.

Efficiency of Interval Walking Training (IWT) in patients with T2D has been established.[15] In the study by Karstoft and co-workers, IWT was administered and

1  
2  
3  
4  
5  
6  
7  
8  
9 monitored using a small exercise computer (JD-mate). IWT induced significant improvements  
10 in physical fitness level, body composition and glycaemic control and in adherence of more  
11 than 85% over a 16 weeks period.[15] The potential benefits of implementing eHealth  
12 solutions in T2D management and the apparent health benefits of and adherence to IWT gave  
13 rise to the development of the InterWalk application (InterWalk app) to deliver IWT.[16]  
14  
15  
16  
17  
18

19  
20 There is a lack of knowledge about the integration of PA in the everyday life  
21 of the patient following rehabilitation interventions.[17] It is, however, known that  
22 successful behavioural change depends on an on-going maintenance of individual  
23 motivation regarding the behaviour and behavioural change itself.[18] Furthermore, time  
24 since onset of diagnosis, unhealthy behaviour and own beliefs about the cause of the  
25 problem, together with the number of previous attempts to change and support from  
26 partners, peers and health professionals are of relevance.[18] This underlines the need for  
27 new interventions with a direct focus on motivational support and self-control regarding  
28 sustaining a newly acquired behavioural change with PA. To better target and structure  
29 manageable interventions related to patients with T2D, understanding patients' individual  
30 priorities and values are crucial. In this regard, knowledge of individual motivation and self-  
31 efficacy to initiate behavioural changes becomes essential to understand.[18]  
32  
33  
34  
35  
36  
37  
38  
39  
40  
41  
42  
43  
44  
45

46 This paper presents a detailed protocol for the InterWalk Randomised  
47 Controlled Trial and is described in accordance with the SPIRIT guidelines (Standard  
48 Protocol Items: Recommendations for Interventional Trials).[19] Results from the trial will  
49  
50  
51  
52  
53  
54  
55  
56  
57  
58  
59  
60

1  
2  
3  
4  
5  
6  
7  
8 follow CONSORT guidelines (CONSolidated Standards Of Reporting Trials) for non-  
9 pharmacological interventions.[20]  
10  
11

### 12 13 14 15 **Trial objective and hypothesis**

16  
17 The objective of the trial is to investigate whether mobile support using the InterWalk  
18 application for smartphones is effective in increasing physical activity levels in persons with  
19 type 2 diabetes over time compared with a standard care rehabilitation program.  
20  
21

22 We investigate the effectiveness of the implementation of Interval Walking Training using the  
23 InterWalk application in the Danish municipality-based rehabilitation program and study  
24 whether the Interval Walking Training is superior to standard care in increasing moderate-  
25 vigorous physical activity 52 after weeks. Furthermore, we expect that a motivational support  
26 program added from end of the intervention to 52-weeks, will increase the physical activity  
27 level in patients with type 2 diabetes and help maintaining a physically active everyday life  
28 long-term.  
29  
30  
31  
32  
33  
34  
35  
36  
37  
38  
39  
40  
41

### 42 **METHODS AND ANALYSIS**

#### 43 44 *Trial design and setting*

45  
46 The trial is a 52-week parallel-arm, open-labelled, randomised controlled trial. The  
47 participants are randomly allocated into two groups, 1) standard care or 2) experimental  
48 group with moderate-and-vigorous physical activity level, doing interval walking  
49  
50  
51  
52  
53  
54  
55  
56  
57  
58  
59  
60

## Effect of Interval walking on type 2 diabetics

BMJ Open

1  
2  
3  
4  
5  
6  
7  
8  
9  
10  
11  
12  
13  
14  
15  
16  
17  
18  
19  
20  
21  
22  
23  
24  
25  
26  
27  
28  
29  
30  
31  
32  
33  
34  
35  
36  
37  
38  
39  
40  
41  
42  
43  
44  
45  
46  
47  
48  
49  
50  
51  
52  
53  
54  
55  
56  
57  
58  
59  
60

facilitated by the InterWalk app. After an 8-12-week intervention period, patients in the experimental group are allocated to do interval walking using the InterWalk app with or without motivational support provided by the health professionals (see Figure 1).

[INSERT FIGURE 1 ABOUT HERE]

The intervention is conducted at the health promotion centres in Danish municipalities and hospitals that consecutively are included as cooperation partners. The municipality of Copenhagen is the first collaborator in the trial. Patients are referred to rehabilitation by their general practitioner (GP). Trained health professionals (physical therapists, nurses and staff with a master's degree) working at the health promotion centres recruit the patients, deliver the interventions and conduct all testing. The overall organization of health care in Denmark is fully tax-financed with universal access to health care services. The Danish model is described in detail elsewhere [21,22] and chronic disease care (including T2D) management is in Denmark based in the Chronic Care Model.[23]

Briefly, GPs refer patients diagnosed with T2D to rehabilitation at either an out-patient clinic, within a municipality or at the hospital level in Denmark. The setting depends on stage of the disease, presence of complications and co-morbidities e.g. severe heart conditions, depression or mental illness. The municipality based rehabilitation primarily includes non-complicated patients (~80% of all patients).[21] If complications or

1  
2  
3  
4  
5  
6  
7  
8  
9 co-morbidities are present, patients are referred to treatment at a specialized clinic at a  
10 hospital. Patients with a non-complicated course of disease receive rehabilitation  
11 consisting of: 1) disease-specific patient education, 2) diet counseling, 3) smoking  
12 cessation and 4) exercise. The composition of the individual rehabilitation program  
13 depends however on disease progression and on the rehabilitation offered in the  
14 municipality-based program or at the hospital. The general focus is patient empowerment,  
15 disease-related self-care and prevention of a decay of the functional capacity of patients  
16 with T2D.  
17  
18  
19  
20  
21  
22  
23  
24  
25

26 The Scientific Ethical Committee at the Capital Region of Denmark (H-1-  
27 2014-074), and the Danish Data Protection Agency (j.nr. 2014-54-0897) have approved the  
28 trial. The InterWalk application is approved by the Danish Data Protection Agency (2008-  
29 58-0035). The trial has been registered at <http://www.clinicaltrials.org> (NCT02341690) on  
30 January 9<sup>th</sup>, 2015. Amendments to the protocol will be approved by the Scientific Ethical  
31 Committee at the Capital Region of Denmark. Amendments will be reported to  
32 <http://www.clinicaltrials.org>. The trial is conducted in accordance with the Helsinki  
33 Declaration.  
34  
35  
36  
37  
38  
39  
40  
41  
42  
43  
44  
45

## 46 **Participants**

### 47 *Eligibility*

48  
49  
50  
51  
52  
53  
54  
55  
56  
57  
58  
59  
60

All non-complicated patients diagnosed with T2D (out-patients), referred to a health promotion centre or hospital in the participating municipalities by their GP, are eligible if more than 18 years of age. A flow chart of participants is presented in Figure 2.

[INSERT FIGURE 2 ABOUT HERE]

The exclusion criteria are medical contraindications to exercise e.g. chronic complications in the locomotive apparatus, painful osteoarthritis or heart conditions.[24] Information is collected through medical records and at a screening interview with a health professional at the health promotion centre. Furthermore, patients are excluded if they do not want to be physically active in the rehabilitation setting or are already participating in other intervention studies at a health promotion centre. The patients have to be able to talk, read and understand the Danish language (for overview over in- and exclusion criterion, see Table 1).

---

**Table 1. ELIGIBILITY CRITERIA**

---

**Inclusion criteria**

- Diagnosed with type 2 diabetes
- Referred by General practitioner to a health promoting centre in participating municipality or hospital

**Exclusion criteria**

- < 18 years of age
  - Medical contraindications to exercise
  - Already participating in other exercise trials
  - Does not talk and read Danish
-



1  
2  
3  
4  
5  
6  
7  
8  
9 If eligible, health professionals give oral and formalized written information with two days  
10 to consider participation in the trial. Written informed consent is obtained before any  
11 additional trial procedures. Enrolment was initiated in January 2015 and recruitment is  
12 terminated on December 15<sup>th</sup> 2016. Last-patient-last-visit is expected in December 2017.  
13  
14  
15  
16  
17  
18  
19

### 20 **Interventions**

21  
22 The trial is developed in collaboration with the health professionals from the municipality  
23 of Copenhagen in Denmark. The interventions are designed to reflect the clinical  
24 rehabilitation settings in Denmark in order to increase the likelihood of implementation of  
25 the programme following this trial, if proven superior. Health professionals from the  
26 municipalities already providing the rehabilitation delivers all interventions in both the  
27 control and experimental groups during the trial period. The investigators (LSV, CB and  
28 HL) led four workshops (16 hours in total) with the health professionals during year 2014,  
29 in which the interventions of the study and work routines were discussed in detail.  
30 Furthermore, all participating health professionals underwent a thorough education  
31 program (15 hours in total) involving all procedures and manuals in the trial. This was  
32 done to ensure standardization of all procedures throughout the trial. In addition,  
33 workshops were held from the start of the trial (January 2014) and hereafter every second  
34 month. This is done to secure that the health professionals follow all procedures and  
35 prepared manuals throughout the trial. The applicability of the trial results is hereby  
36  
37  
38  
39  
40  
41  
42  
43  
44  
45  
46  
47  
48  
49  
50  
51  
52  
53  
54  
55  
56  
57  
58  
59  
60

## Effect of Interval walking on type 2 diabetics

BMJ Open

1  
2  
3  
4  
5  
6  
7  
8  
9 increased, as the interventions are already part of the rehabilitation programme offered to  
10 patients with T2D in the municipalities.  
11

12  
13 The interventions in the trial consist of two phases (Figure 1). In phase one (8-  
14 12 weeks), patients are randomised to either a standard care group (control intervention) or  
15 an experimental group doing IWT using the InterWalk app. The present trial uses the  
16 standard care programme as control intervention and is conducted directly in the clinical  
17 setting. All patients receive supervision across phase one. In phase two (40-44 weeks),  
18 patients in the standard care group have no follow-up until 52 weeks post baseline. Patients  
19 in the experimental intervention group are in phase two randomly allocated to either IWT  
20 with or without motivational support (see section Experimental intervention – Interval  
21 Walking with the InterWalk application). Additional rehabilitation care (co-interventions)  
22 with disease-specific patient education, diet counseling and smoking cessation is offered to  
23 all patients across the intervention groups. The interventions are summarized in Table 2.  
24  
25  
26  
27  
28  
29  
30  
31  
32  
33  
34  
35  
36  
37  
38  
39  
40  
41  
42  
43  
44  
45  
46  
47  
48  
49  
50  
51  
52  
53  
54  
55  
56  
57  
58  
59  
60

Effect of Interval walking on type 2 diabetics

BMJ Open

1  
2  
3  
4  
5  
6  
7  
8  
9  
10  
11  
12  
13  
14  
15  
16  
17  
18  
19  
20  
21  
22  
23  
24  
25  
26  
27  
28  
29  
30  
31  
32  
33  
34  
35  
36  
37  
38  
39  
40  
41  
42  
43  
44  
45  
46  
47  
48  
49

**Table 2. INTERVENTIONS IN THE TRIAL DURING PHASE ONE AND TWO**

| <b>PHASE ONE</b>                                                                        |                                                                                                                                                                                                                                                                                                                                                                                                                                                                                                                                                        |
|-----------------------------------------------------------------------------------------|--------------------------------------------------------------------------------------------------------------------------------------------------------------------------------------------------------------------------------------------------------------------------------------------------------------------------------------------------------------------------------------------------------------------------------------------------------------------------------------------------------------------------------------------------------|
| <b>STANDARD CARE (CONTROL INTERVENTION)</b>                                             |                                                                                                                                                                                                                                                                                                                                                                                                                                                                                                                                                        |
| <b>Group based training at the health promotion centre (Control intervention) (1/3)</b> | <ul style="list-style-type: none"> <li>• Group based sessions with 4-12 patients</li> <li>• Two sessions per week at the health promotion centre</li> <li>• Warm-up exercises</li> <li>• Cardio-respiratory exercises</li> <li>• Resistance training</li> <li>• Cool down period</li> </ul>                                                                                                                                                                                                                                                            |
| <b>EXPERIMENTAL INTERVENTION</b>                                                        |                                                                                                                                                                                                                                                                                                                                                                                                                                                                                                                                                        |
| <b>Interval Waling Training (IWT) (2/3)</b>                                             | <ul style="list-style-type: none"> <li>• Group based Interval Walking Training (IWT) using the InterWalk app</li> <li>• Introduction to the InterWalk app</li> <li>• Follow-up instructions and guidance</li> <li>• IWT using the InterWalk app</li> <li>• Three times per week, 60 minutes per session - twice a week at a health promotion centre in a group and one time alone in everyday life</li> <li>• End of phase one: preparation to continue IWT with IW app in the end of the intervention period, through a transition program</li> </ul> |
| <b>PHASE TWO</b>                                                                        |                                                                                                                                                                                                                                                                                                                                                                                                                                                                                                                                                        |
| <b>STANDARD CARE (CONTROL INTERVENTION)</b>                                             |                                                                                                                                                                                                                                                                                                                                                                                                                                                                                                                                                        |
| <b>Group based training at the health promotion centre (Control intervention) (1/3)</b> | <ul style="list-style-type: none"> <li>• No intervention at the health promotion centre</li> <li>• Follow-up at 52-week</li> </ul>                                                                                                                                                                                                                                                                                                                                                                                                                     |
| <b>EXPERIMENTAL INTERVENTION</b>                                                        |                                                                                                                                                                                                                                                                                                                                                                                                                                                                                                                                                        |
| <b>IWTgroup (1/3)</b>                                                                   | <ul style="list-style-type: none"> <li>• No intervention at the health promotion centre</li> <li>• Follow-up at 52-weeks</li> </ul>                                                                                                                                                                                                                                                                                                                                                                                                                    |

Effect of Interval walking on type 2 diabetics

BMJ Open

1  
2  
3  
4  
5  
6  
7  
8  
9  
10  
11  
12  
13  
14  
15  
16  
17  
18  
19  
20  
21  
22  
23  
24  
25  
26  
27  
28  
29  
30  
31  
32  
33  
34  
35  
36  
37  
38  
39  
40  
41  
42  
43  
44  
45  
46  
47  
48  
49

|                                                           |                                                                                                                                                                                                                                                                                                                                  |                                                                                                                                                                                                                                                                                                                                                                                                                                                                                                                                                                                                                                                                                                                                                                                                                                                                                                                                                                       |
|-----------------------------------------------------------|----------------------------------------------------------------------------------------------------------------------------------------------------------------------------------------------------------------------------------------------------------------------------------------------------------------------------------|-----------------------------------------------------------------------------------------------------------------------------------------------------------------------------------------------------------------------------------------------------------------------------------------------------------------------------------------------------------------------------------------------------------------------------------------------------------------------------------------------------------------------------------------------------------------------------------------------------------------------------------------------------------------------------------------------------------------------------------------------------------------------------------------------------------------------------------------------------------------------------------------------------------------------------------------------------------------------|
|                                                           | <p><b>IWTsupport-group (1/3)</b><br/> <b>Motivational Support</b><br/> <b>1. Individual Motivational interviews with individual goal setting (semi-structured)</b><br/><br/> <b>2. Short Message Service (SMS)</b><br/> <i>One weekly SMS and one SMS every fourth week</i><br/><br/> <b>3. Interval Walking Ambassadors</b></p> | <ul style="list-style-type: none"> <li>• Four semi-structured individual motivational interviews are scheduled in phase two: week 16, 20, 28, 40.</li> <li>• Each interview is scheduled to last 30 minutes</li> <li>• Individual goal setting related to everyday life following the SMART-principle.</li> <li>• The aim of goal setting is to help the patient reflect on their physical activity habits</li> <li>• Weekly SMS</li> <li>• The reply indicates amount of IWT during the past week (none, 1-2 or 3 or more)</li> <li>• If no reply for two consecutive weeks, or if the reply indicates none-walking, then the patient is contacted by phone by a health professional</li> <li>• SMS every fourth week</li> <li>• Encourages the patient to make a new walking test using the InterWalk app</li> <li>• Educated patients with T2D do interval walking in local community near the health promotion centres</li> <li>• One session per week</li> </ul> |
| <p><b>Co-interventions (Across phase one and two)</b></p> | <p><b>ADDITIONAL REHABILITATION CARE (CO-INTERVENTIONS) WITH SPECIFIC FOCUS AREAS</b></p> <p><b>Patient education</b></p> <p><b>Diet counselling</b></p> <p><b>Smoking Cessation</b></p>                                                                                                                                         | <p>Disease related education regarding living with type 2 diabetes, empowerment and self-management and medication handled by either medical doctor, a nurse, physical therapist or dietitian and another patient with type 2 diabetes - group based or individually handled</p> <p>Diabetes specific diet counselling - group based or individually handled by a dietitian</p> <p>Smoking cessation courses is handled by smoking cessation counsellors<br/>The course lasts 10-12 hours and can be either individually or group based</p>                                                                                                                                                                                                                                                                                                                                                                                                                           |

1  
2  
3  
4  
5  
6  
7  
8  
9  
10  
11  
12  
13  
14  
15  
16  
17  
18  
19  
20  
21  
22  
23  
24  
25  
26  
27  
28  
29  
30  
31  
32  
33  
34  
35  
36  
37  
38  
39  
40  
41  
42  
43  
44  
45  
46  
47  
48  
49  
50  
51  
52  
53  
54  
55  
56  
57  
58  
59  
60

***Experimental intervention – Interval Walking Training with the InterWalk application***

Patients allocated to the experimental intervention do interval walking after baseline test provided by health professionals (phase one). IWT is provided by health professionals to smaller groups of 3-12 patients. After the intervention period in phase two patients are allocated to either receive IWT without motivational support during follow-up (IWTgroup) or IWT with motivational support during follow-up (IWTsupport-group) (Figure 1). Trained health professionals conduct the IWT sessions (see below) and the motivational support in phase two. Table 2 gives an example of a typical week with interval walking in the experimental intervention group.

***Interval Walking Training using The InterWalk Application***

Interval Walking Training is performed using the InterWalk app, which works as a personal trainer as well as a monitoring unit allowing researchers to continuously and automatically monitor and store the physical activity level in a central database (Figure 3).[16]

Interval Walking Training is personalized through a standardised eight-minute walking test, performed with the app before engaging in IWT.[25] The InterWalk app guides the user in IWT with repeated cycles of 3 minutes fast and 3 minutes slow walking. During Interval Walking Training (IWT) the InterWalk app provides the patient with continuous feedback on the walking speed. The patients are able to track exercise history and receive historic feedback on the quality of the IWT session using the app. The feedback system

1  
2  
3  
4  
5  
6  
7  
8  
9 employs the on-board accelerometer of the phone and GPS system to assess intensity and  
10 geographical location. Information on training intensity, total number of steps per day, IWT-  
11 data and data from the standardised walking test is stored in the smartphone or iPod and  
12 automatically transmitted to the central database at the Danish Strategic Research Centre for  
13 Type 2 Diabetes (DD2) when connected to Wi-Fi or mobile data network.[16]  
14  
15  
16  
17  
18  
19

20  
21  
22 [INSERT FIGURE/IMAGE 3 ABOUT HERE]  
23  
24  
25

### 26 *Experimental intervention, phase one*

27  
28 The patient receives a thorough introduction to the InterWalk app with follow-up  
29 instructions. The introduction consists of information and test of the app and the patient can  
30 ask clarifying questions if needed. A detailed manual regarding the InterWalk app is  
31 extradited to each patient. The health professional provides technical guidance and helps the  
32 patient to structure an everyday life with IWT during phase one. Patients are encouraged to  
33 perform IWT using the InterWalk app (see section: InterWalk Walking Training using the  
34 InterWalk Application) as a minimum three times per week, 30 to 60 minutes per session,  
35 with two of the sessions taking place at the health promotion centre and the third is  
36 conducted in the patient's everyday life environment. The aim is that all patients are capable  
37 of continuing IWT using the InterWalk app at the end of phase one (Table 3).  
38  
39  
40  
41  
42  
43  
44  
45  
46  
47  
48  
49  
50  
51  
52  
53  
54  
55  
56  
57  
58  
59  
60

## Effect of Interval walking on type 2 diabetics

## BMJ Open

Table 3, EXAMPLE OF EXPERIMENTAL INTERVENTION FOR ONE WEEK IN PHASE ONE

| Weekday          | Intervention at the Health promotion centre                                                                                                                                                                                                                                                                                                                                                                                                                                                                                                                                                                                                                                                                                                                                                                                                                                                                                                                                                                                    | Independent training in own environment | Notes to health professionals                                                                                                                                                                                                                                                                                                                                                                                       |
|------------------|--------------------------------------------------------------------------------------------------------------------------------------------------------------------------------------------------------------------------------------------------------------------------------------------------------------------------------------------------------------------------------------------------------------------------------------------------------------------------------------------------------------------------------------------------------------------------------------------------------------------------------------------------------------------------------------------------------------------------------------------------------------------------------------------------------------------------------------------------------------------------------------------------------------------------------------------------------------------------------------------------------------------------------|-----------------------------------------|---------------------------------------------------------------------------------------------------------------------------------------------------------------------------------------------------------------------------------------------------------------------------------------------------------------------------------------------------------------------------------------------------------------------|
| <i>Monday</i>    | Duration: 90 minutes<br>1. Warm-up: short walk in a group to the walking point (either a park or an area near the health promotion centre)<br>2. Interval Walking Training: every patient does Interval Walking Training with the InterWalk app for a minimum of 30 minutes. Every patient does the Interval Walking Training by themselves so that the app instructions during the session can be followed. The health professionals guide and facilitate the individual patient if necessary. After the Interval Walking Training everyone goes back to the health promotion centre<br>3. Group conversation at the health promotion centre after doing interval walking with all participating patients. Different focus areas are discussed in the group. Everyone sits on a chair and the health professional participates as a facilitators in the group conversation (examples of focus areas: weather conditions, motivation for exercise, social needs when waking, motivation for a physically active everyday life) |                                         | Remember to encourage and guide every patient to do Interval Walking Training three times a week either by themselves or together with other patients.<br><br>Make sure that everyone are active during the walking sessions.<br><br>If a patient needs to do a new walking test then it is the health professional who should help during the intervention period. Every patient need a new test every forth week. |
| <i>Tuesday</i>   | Rest day                                                                                                                                                                                                                                                                                                                                                                                                                                                                                                                                                                                                                                                                                                                                                                                                                                                                                                                                                                                                                       |                                         |                                                                                                                                                                                                                                                                                                                                                                                                                     |
| <i>Wednesday</i> | Duration: 90 minutes<br>1. Warm-up: short walk in a group to the walking point (either a park or an area near the health promotion centre)<br>2. Interval Walking Training: every patient does Interval Walking Training with the InterWalk app for a minimum of 30 minutes. Every patient does the Interval Walking Training by themselves so that the app instructions during the session can be followed. The health professionals guide and facilitate individual patient if necessary. After the Interval Walking Training everyone goes back to the health promotion centre.<br>3. Group conversation at the health promotion centre after doing interval walking with all participating patients. Different focus areas are discussed in the group. Everyone sits on a chair and the health                                                                                                                                                                                                                             |                                         |                                                                                                                                                                                                                                                                                                                                                                                                                     |

Effect of Interval walking on type 2 diabetics

BMJ Open

professional participates as a facilitators in the group conversation  
 (examples of focus areas: weather conditions, motivation for exercise,  
 social needs when waking, motivation for a physically active everyday  
 life)

*Thursday* Rest day  
*Friday* Rest day  
*Saturday*

Interval walking using  
 the InterWalk  
 application for 30-60  
 minutes.  
 Can be done alone or  
 together with other  
 patients.

*Sunday* Rest day

---

Patients allocated to the experimental intervention do interval walking twice a week, 30 to 60 minutes per session during phase one at the health promotion centre in small groups of 3-12 patients. A third session is conducted in the patient's everyday life environment.

For peer review only

1  
2  
3  
4  
5  
6  
7  
8  
9  
10  
11  
12  
13  
14  
15  
16  
17  
18  
19  
20  
21  
22  
23  
24  
25  
26  
27  
28  
29  
30  
31  
32  
33  
34  
35  
36  
37  
38  
39  
40  
41  
42  
43  
44  
45  
46  
47  
48  
49



1  
2  
3  
4  
5  
6  
7  
8  
9  
10  
11  
12  
13  
14  
15  
16  
17  
18  
19  
20  
21  
22  
23  
24  
25  
26  
27  
28  
29  
30  
31  
32  
33  
34  
35  
36  
37  
38  
39  
40  
41  
42  
43  
44  
45  
46  
47  
48  
49  
50  
51  
52  
53  
54  
55  
56  
57  
58  
59  
60

*Experimental intervention, phase two*

In phase two patients in the experimental intervention group are randomly allocated into two follow-up conditions: with unsupervised Interval Walking Training without support (IWTgroup) or with motivational support (IWTsupport-group) following the intervention period until 52-week follow-up (see Figure 1).

*Interval Walking Group without support (IWTgroup)*

All patients in the Interval Walking Group (IWTgroup) are encouraged to continue to perform IWT with the InterWalk app three times a week, 30 to 60 minutes per session. The patients are not provided with any follow-up or support from health professionals from the end of the intervention period until follow-up at 52-weeks. However, patients are allowed to contact the health professionals at the health promotion centre at any time if necessary.

*Interval Walking Group with support (IWTsupport-group)*

Patients in the Interval Walking Group with support (IWTsupport-group) are also encouraged to do IWT with the InterWalk app three times per week. All patients in the IWTsupport-group receive additional motivational support by the health professionals at the promotion centre (see below for information regarding the motivational support).

*Motivational support (phase two)*

The motivational support is summarised in Table 4. The motivational intervention consists of four motivational interviews with individual goal setting and weekly Short Message

1  
2  
3  
4  
5  
6  
7  
8  
9 Service via the mobile phone (a SMS-track), (see Figure 5 and 6). Furthermore, patients  
10 have the opportunity to participate in IWT at predefined timeslots with an Interval Walking  
11 Ambassador in the local community near the health promotion centre (see Figure 1).  
12  
13

14  
15 *Motivational interview and goal setting:* All health professionals from the  
16 municipalities are well-educated in conducting the motivational interview with patients. All  
17 health professionals working in a health promotion centre in Denmark are obligated to  
18 participate in formalised motivational interviewing courses conducted by educators with  
19 psychological background. The Motivational interview is a semi-structured interview used  
20 to structure the communication between the patient and the health professional. The  
21 interview works as a partnership where focused and detailed questions reveal and visualize  
22 the patients motivation and barriers towards behaviour change and acknowledgement of  
23 patient autonomy.[26] Four motivational interviews are scheduled for each patient in the  
24 IWT support-group. See Table 4 for more detail. The motivational interview seek to help the  
25 patients reflect on their physically active habits and to set individual motivating goals related  
26 to everyday life.[27] The health professional secures all notes and reflections from the  
27 interview in the InterWalk database. As more than one interview is conducted over the trial  
28 period fidelity may be ensured when the health professional uses the patient's reflections  
29 from the former interview to help reflect upon motivation and barriers towards changes in  
30 the next motivational interview. The goal setting is based on the S.M.A.R.T.-principle  
31 derived from the Goal Setting Theory developed by Edwin Locke.[28] S stands for Specific  
32  
33  
34  
35  
36  
37  
38  
39  
40  
41  
42  
43  
44  
45  
46  
47  
48  
49  
50  
51  
52  
53  
54  
55  
56  
57  
58  
59  
60

(e.g. what do I want to accomplish?), M for Measurable (e.g. specific and measurable), A for achievable (realistic), R for relevant (individual goals) and T for timely (not too big to achieve in a short period).[29]

---

**Table 4. MOTIVATIONAL INTERVIEWS WITH INDIVIDUAL GOAL SETTING**

**PHASE TWO, IWTsupport-group**

|                                                                                   |                                                                                                                                                                                                                                                                                                                                                                                                                                                                                                                                        |
|-----------------------------------------------------------------------------------|----------------------------------------------------------------------------------------------------------------------------------------------------------------------------------------------------------------------------------------------------------------------------------------------------------------------------------------------------------------------------------------------------------------------------------------------------------------------------------------------------------------------------------------|
| <i>Four semi-structured motivational interviews with individual goal setting,</i> | <ul style="list-style-type: none"> <li>○ The interviews aim at helping the patient to reflect on why and how physical activity can be incorporated in everyday life</li> <li>○ Make informed choices regarding behavioral changes regarding physical activity</li> <li>○ Relate to own everyday life</li> <li>○ Clarify barriers and facilitators of importance for the individual</li> <li>○ Two to three individual goals are set at all interviews</li> <li>○ The goals is based on need in the individual everyday life</li> </ul> |
|-----------------------------------------------------------------------------------|----------------------------------------------------------------------------------------------------------------------------------------------------------------------------------------------------------------------------------------------------------------------------------------------------------------------------------------------------------------------------------------------------------------------------------------------------------------------------------------------------------------------------------------|

---

A short resume with the individual goal setting is written after all interviews in the database. The written text is prospectively incorporated in the following interviews with the patient at the health promotion centre

---

The interviews are placed in Week 16, 20, 28, 40 post baseline-test. Goal setting in the interviews are based on the *the S.M.A.R.T.- principle derived from the Goal Setting Theory developed by Edwin Locke*. [28]

*Short Message Service (henceforth referred to as text message)* enables inexpensive and possibly effective interaction between patients and health professionals at any time or place.[30,31] Communication as well as feedback is believed to enhance motivation through feelings of competence and relatedness [32], which may positively affect adherence to treatment. Text messages have shown positive effect on various health outcomes including diabetes self-management when used in behavior change interventions. Further, a higher effectiveness and lower attrition rate has been observed when customized and tailored messages is used.[30] In the present study, the patient receives two types of text messages during phase two (see Figure 4 and 5). The first type is a weekly and interactive

## Effect of Interval walking on type 2 diabetics

## BMJ Open

1  
2  
3  
4  
5  
6  
7  
8  
9 text message consisting of questions regarding the amount of IWT performed during the past  
10 week (see Figure 4). The patients are required to give feedback by returning a text message  
11 with one of the three response options provided. If the patient does not reply for two  
12 consecutive weeks, or if the patient answers that she/he has not been walking, a personal  
13 phone call to the patient is conducted from a health professional from the local health  
14 promotion centre. The aim of the call is to encourage and help the patient to plan IWT to fit  
15 the individual life of the patient. The second type of text message is sent every fourth week,  
16 encouraging the patients to perform the walking test using the InterWalk app without a  
17 requirement of feedback (see Figure 5).  
18  
19  
20  
21  
22  
23  
24  
25  
26  
27  
28  
29  
30

31 [INSERT FIGURE 4 AND 5 ABOUT HERE]  
32  
33  
34

35 *Interval Walking Ambassadors:* Using peers to educate other patients with  
36 T2D has shown effective in providing ongoing support over a longer period.[33,34] In this  
37 study, volunteer patients with T2D are recruited through the Danish Diabetes Association,  
38 where a consultant contacts possible patients via e-mail. The Interval Walking Ambassadors  
39 do IWT locally in phase two with patients from the IWTsupport group. The Interval  
40 Walking Ambassadors receives a two-day training programme in the participating  
41 municipality by researchers from the InterWalk research group. At any time during phase  
42  
43  
44  
45  
46  
47  
48  
49  
50  
51  
52  
53  
54  
55  
56  
57  
58  
59  
60

1  
2  
3  
4  
5  
6  
7  
8  
9 two, patients can attend IWT at predefined timeslots with an Interval Walking Ambassador  
10  
11 (see Table 2).

### 12 13 14 15 *Adherence to interventions*

16  
17 To prevent patients from dropping out during phase one of the trial, patients are contacted  
18  
19 by phone by a trained health professional if they fail to appear at the planned training  
20  
21 sessions. Up to five attempts are made to contact the patient. In phase two only patients  
22  
23 allocated to the IWTsupport-group are monitored by SMS-track and supervised during the  
24  
25 phase until week 52. Patients in IWTgroup have no contact with the health professionals  
26  
27 until 52-weeks follow-up (see Figure 1).  
28  
29  
30  
31  
32

### 33 *Control intervention – Standard care*

34  
35 Patients in the control group receive the standard rehabilitation treatment offered to  
36  
37 patients with T2D in Denmark in a multimodal setting including physical activity (phase  
38  
39 one, Figure 1). The duration of rehabilitation treatment differs between participating  
40  
41 municipalities, but may not be shorter than eight weeks during phase one. At the end of the  
42  
43 standard care rehabilitation program in the municipalities there is no follow-up on the  
44  
45 exercise intervention, which is the normal procedure in Danish municipalities (phase two,  
46  
47 Figure 1).[35]  
48  
49  
50  
51  
52  
53  
54  
55  
56  
57  
58  
59  
60

1  
2  
3  
4  
5  
6  
7  
8  
9  
10  
11  
12  
13  
14  
15  
16  
17  
18  
19  
20  
21  
22  
23  
24  
25  
26  
27  
28  
29  
30  
31  
32  
33  
34  
35  
36  
37  
38  
39  
40  
41  
42  
43  
44  
45  
46  
47  
48  
49  
50  
51  
52  
53  
54  
55  
56  
57  
58  
59  
60

The participating municipalities offer group exercise twice a week at the health promotion centres with 6-15 patients participating depending on the population size in the participating municipality. The content of the group exercise period is based on clinical guidelines in Denmark. A typical session is structured with first a short warm-up session followed by a strength and cardio part and finished with a cool-down period with strengthening (See Table 2). Furthermore, it is recommended that the patients have regularly consultation at the general practitioner every third month.

#### ***Additional rehabilitation care (Co-interventions)***

All patients receiving rehabilitation at either a health promotion centre or at the hospital receives an offer of specific disease related patient education, diet counselling and smoking cessation.[35] It is optional whether the patient participate in one or all additional offers.

*Disease specific patient education* includes a section focused on behaviour modification and self-management and a specific part on diseases were the patients get knowledge regarding sequelae. *Diet counselling* regarding nutritional advice when living with T2D is handled by a dietitian. *Smoking cessation* is either group based or in individual process and is handled by smoking cessation counsellors.

#### **Trial endpoints and Assessments**

1  
2  
3  
4  
5  
6  
7  
8  
9  
10  
11  
12  
13  
14  
15  
16  
17  
18  
19  
20  
21  
22  
23  
24  
25  
26  
27  
28  
29  
30  
31  
32  
33  
34  
35  
36  
37  
38  
39  
40  
41  
42  
43  
44  
45  
46  
47  
48  
49  
50  
51  
52  
53  
54  
55  
56  
57  
58  
59  
60

Previous studies have established that physical activity influences glycaemic control [36] and Karstoft and colleagues (2013) has shown that physical activity with Interval Walking Training had effect on glycaemic control in patients with T2D. [15] Moreover, medication and dietary interventions have also proven to improve glycaemic control and reduce disease related complications.[37–39] In the present trial the primary outcome focus on physical activity in relation to everyday life.

Data on the primary and secondary outcomes are obtained at baseline, post intervention (after 8-12 weeks) and 52 weeks after enrolment (Table 5). To standardize all measurements between health professionals and participating centres, all health professionals uses standardised protocols crafted for the trial regarding procedures and measurements. All data are entered directly in an online database (see section: Data management and quality control).

## Effect of Interval walking on type 2 diabetics

Table 5, SUMMARY OF DATA COLLECTION AND MEASURES

| Measurements                                         | Description                                                                          | Baseline | 8-12 weeks | 52 weeks |
|------------------------------------------------------|--------------------------------------------------------------------------------------|----------|------------|----------|
| <i>Demographic</i> <sup>*†‡</sup>                    |                                                                                      |          |            |          |
| Age (median)                                         | Obtained using self report                                                           | x        | -          | -        |
| Women                                                |                                                                                      | x        | -          | -        |
| Marital status                                       |                                                                                      | x        | -          | -        |
| Diabetes duration                                    |                                                                                      | x        | -          | -        |
| Education level                                      |                                                                                      | x        | -          | -        |
| Height, weight, body mass index                      | Obtained using standard procedures                                                   | x        | x          | x        |
| <i>Medical history</i> <sup>*†‡</sup>                | Obtained using medical records                                                       |          |            |          |
| History of Heart disease                             |                                                                                      | x        | x          | x        |
| Hypertension                                         |                                                                                      | x        | x          | x        |
| Kidney disease                                       |                                                                                      | x        | x          | x        |
| Chronic Obstructive Pulmonary Disease (COPD)         | Defined by FEV1<70%                                                                  | x        | x          | x        |
| <i>Medicine</i> <sup>*†</sup>                        |                                                                                      |          |            |          |
| Self-reported use of medication                      |                                                                                      | x        | x          | x        |
| Register-data use of medicine                        |                                                                                      | x        | x          | x        |
| <i>Physical fitness</i> <sup>*</sup>                 |                                                                                      |          |            |          |
| Moderate-to-Vigorous-intensity                       | Accelerometer (Axivity AX3, Newcastle, UK), worn for seven consecutive days, 3 times | x        | x          | x        |
| Total physical activity (VO <sub>2</sub> -peak)      | InterWalk - Walking test performed using an iPod touch or iPhone                     | x        | x          | x        |
| <i>Strength</i> <sup>*</sup>                         | Lower extremities Sit-To-Stand                                                       | x        | x          | x        |
| <i>Patient Reported Outcomes (PROs)</i> <sup>*</sup> |                                                                                      |          |            |          |
| Behavioural Regulation in Exercise                   | Obtained using BREQ-2, Behavioural Regulation in Exercise Questionnaire              | x        | x          | x        |



## Effect of Interval walking on type 2 diabetics

## BMJ Open

|                                    |                                                                                                                    |   |   |   |
|------------------------------------|--------------------------------------------------------------------------------------------------------------------|---|---|---|
| Physical Activity                  | <i>Obtained using R-PAQ, Resent Physical Activity Questionnaire</i>                                                | x | x | x |
| Health related quality of life     | <i>Obtained using SF-12, Short Form - Health Related Quality of life Questionnaire</i>                             | x | x | x |
| Automaticity of behaviour          | The Self-Report Habit Index                                                                                        |   | x | x |
| Personality traits†                | <i>Obtained using NEO-FFI, Neuroticism, Extroversion and Openness – Five Factor Inventory (Personality traits)</i> | x | - | - |
| Risk behaviour‡                    | <i>Obtained using SES, Sensation Seeking Scale (risk behaviour)</i>                                                | x | x | x |
| <i>Adherence to interventions*</i> |                                                                                                                    |   |   |   |
| Attendance registration            | From baseline to 8-12 weeks                                                                                        | x | x | x |
| Log in the InterWalk app           | Measured by the electronic log in the InterWalk-app                                                                | x | x | x |
| <i>Registry data assessment*‡</i>  |                                                                                                                    |   |   |   |
| Mortality, cause of death          | Obtained using medical records                                                                                     | - | x | x |
| Hospitalization                    |                                                                                                                    | - | x | x |
| Contract with general practitioner |                                                                                                                    | - | x | x |

\* Article 1: The effectiveness of smartphone delivered Interval Walking Training on moderate-and-vigorous physical activity versus standard care in patients with type 2 diabetes: a parallel group single-blinded randomized controlled trial.

†Article 2: Baseline characteristics and personality traits in patients with type 2 diabetes: descriptive study of all participants

‡Article 3: Nay Sayers – Characteristics of patients who does not want to be part of a physical activity study related to everyday life; all patients referred to the health promotion centre in the municipalities participating in the randomized controlled trial.

§Article 4: Effectiveness of smartphone delivered Interval Walking Training versus standard care in patients with type 2 diabetes on HbA1c and HDL, high-density lipoprotein; LDL, low-density lipoprotein: A sub-study to the randomized controlled trial (The InterWalk Trial, article 1), measured in a sub-sample (n=40).

### ***Primary outcome***

The primary outcome is change in moderate-to-vigorous-intensity physical activity from baseline to 52-week follow-up.

### ***Secondary outcomes***

The key secondary outcome changes in motivation for sustaining a behavioural change with physical activity in everyday life at 52-week follow-up.

Other secondary outcomes of interest are changes in patients' fitness level measured as VO<sub>2</sub>-peak by the standardised walking test (part of the InterWalk application) and health-related quality of life. Strength in the lower extremities, adherence to intervention and impact of personality traits on physical activity in everyday life are also considered exploratory secondary outcomes. All outcomes are measured at baseline, after intervention and at 52-week follow-up (see Figure 2).

### ***Data collection***

#### ***Level of daily moderate-to-vigorous-intensity physical activity***

It is important to gain knowledge into physical activity in everyday life. To determine level of daily moderate-to-vigorous-intensity physical activity a hip-mounted physical activity monitor (Axivity AX3, Newcastle, UK) is worn for seven consecutive days, at three time periods during the trial period; after baseline-test, after the intervention period and again at

1  
2  
3  
4  
5  
6  
7  
8  
9 52-weeks follow-up. The monitor is fixed using adhesive tape (Leukomed T, BSN medical,  
10 Germany) on right side the lumbar spine. Additionally, a monitor is fixed on on the lateral  
11 side of the right thigh (Leukomed T, BSN medical, Germany) for supporting information  
12 about posture.[25] The patients are instructed not to remove the physical activity monitor at  
13 any time during the three time periods. If de-attached, the participants are trained in fixing  
14 the monitors correctly and are instructed to note the incident. If the patients need help in  
15 fixing the monitors correctly the health professionals at the health promotion centre are  
16 educated to help.  
17  
18  
19  
20  
21  
22  
23  
24  
25  
26  
27

#### 28 *Physical activity diary*

29  
30 In order to validate the physical activity level during the seven days with physical activity  
31 monitors we ask the patient to complete a seven-day diary to report number of work- and  
32 sleep hours, bicycling and strength training sessions at the three time periods on a daily  
33 basis. The physical activity monitor and the diary are returned free-of-charge via mail. The  
34 patient is contacted by phone after within one week if the physical activity monitors are not  
35 returned as expected.  
36  
37  
38  
39  
40  
41  
42  
43  
44  
45

#### 46 *Motivation for behaviour change with physical activity*

47  
48 Changes in motivation for sustaining a behavioural change with physical activity in  
49 everyday life is measured with the Behavioural Regulation of Exercise Questionnaire  
50  
51  
52  
53  
54  
55  
56  
57  
58  
59  
60

1  
2  
3  
4  
5  
6  
7  
8  
9 (BREQ-2) which measures individual motivation for physical activity. The questionnaire  
10 consists of 19 questions in a 0-4 Likert format.[40] In addition to the questionnaire, patients  
11 are asked to answer four questions in a 0-4 Likert format, regarding motivation for physical  
12 activity after being diagnosed with T2D.  
13  
14  
15  
16

### 17 18 19 20 *Health Related Quality of Life*

21 The patients Health Related Quality of Life is very important to maintain after being  
22 diagnosed with T2D.[41] To gain knowledge into the individual perception of quality of life  
23 on a physical and mental level we use the Short-Form Health Survey (SF-12). The  
24 questionnaire consists of 12 questions and uses a Likert scale of 1-3 for the physical function  
25 items; 1-5 for the bodily pain, social function, and general health perceptions items; 1-6 for  
26 the vitality and mental health; and a dichotomous scale of yes/no for the presence of role  
27 function limitations. The higher score, the higher level of health or functioning.[42]  
28  
29  
30  
31  
32  
33  
34  
35  
36  
37  
38  
39

### 40 *Maintenance of behaviour change with physical activity*

41 Automaticity of behaviour is essential when new habits become present in the everyday  
42 life.[43] To measure if the patient has adopted new habits as a result of the intervention we  
43 ask the patient to answer four questions from The Self-Report Habit Index. The Index uses a  
44 0-4 Likert format and the four questions to be answered measures automatic activation,  
45 frequency of behaviour and relevance to self-identity related to physical activity.[44]  
46  
47  
48  
49  
50  
51  
52  
53  
54  
55  
56  
57  
58  
59  
60

### *VO<sub>2</sub>-peak*

VO<sub>2</sub>-peak is measured by a validated and standardised walking test consisting of 5 stages incorporated in the InterWalk app; 1) 30 sec. of standing still, 2) 2 min. of slow walking 3) 2 min. of walking at moderate intensity 4) 2 min. walking at high intensity 5) 1 min. walking at highest intensity possible. The four paces are self-selected (See, Figure 3 and 4).[25] The test is performed with an iPod placed in the pocket at the hip and the instructions are delivered from the app through earphones. To ensure the right walking intensity in the intervention period, the patients are asked to perform the test every 4<sup>th</sup> week.[16]

### *Strength in the lower extremities*

The sit-to-stand test (30 seconds) measures the lower body strength and will be administered using a chair without arms. The patient is encouraged to complete as many full stands as possible within a 30-sec time limit.[45]

### *Adherence to the intervention*

Adherence is determined by an evaluation and quantification of the electronic log of data from the InterWalk app to the central database of all uploaded data.

### *Self-rated physical activity*

1  
2  
3  
4  
5  
6  
7  
8  
9  
10  
11  
12  
13  
14  
15  
16  
17  
18  
19  
20  
21  
22  
23  
24  
25  
26  
27  
28  
29  
30  
31  
32  
33  
34  
35  
36  
37  
38  
39  
40  
41  
42  
43  
44  
45  
46  
47  
48  
49  
50  
51  
52  
53  
54  
55  
56  
57  
58  
59  
60

The “Recent Physical Activity Questionnaire” (RPAQ) has 9 main questions, which covers 4 domains of physical activity: domestic life, work, recreation and transport. Physical Activity is estimated in MET’s (Metabolic Equivalent). In answering the questions in the questionnaire, the patient will answer in regards to the last four weeks with physical activity in the everyday life.[46]

#### *Personality traits*

The NEO-Five Factor Inventory (NEO-FFI) [47] consists of 60 questions in a 0-4 Likert format constructed by selecting 2 items from each of the six facets characterizing each of the five personality traits (Neuroticism, Extraversion, Openness, Agreeableness, Conscientiousness) assessed by NEO-PI-R. The Sensation Seeking Scale (SES) [48] is a 40 items self-administered questionnaire consisting of 40 questions designed to test the tendency towards varied, novel and intense sensations.

#### *Demographic, social economic and anthropometry measures*

Information on height, weight, waist and hip circumference is collected before inclusion through an electronic questionnaire at the first formal meeting at the health promotion centre and after the intervention period and again at 52-week follow-up. Waist circumference is measured at the point between the top of the iliac crest and the bottom of the costae regardless of the placement of the umbilicus. A Tanita stadiometer is used to measure height

1  
2  
3  
4  
5  
6  
7  
8  
9 and an electronic weight to measure weight. Data on self-reported information together with  
10 relevant national registers will be used to obtain information regarding hospitalization, co-  
11 morbidities, medical history, use of medicine and mortality.  
12

13  
14  
15 *Height* measurement is conducted using a portable altimeter (Tanita  
16 Stadiometer). The measurement is done without shoes and is repeated two times with each  
17 measure to nearest 0,1 cm. If the two measures are dissimilar with more than 0,5 cm, then  
18 the measurement is repeated. *Weigh* is measured in kilograms (kg) using an electronic  
19 weight. The measure is repeated two times with each measure to nearest 0,1 cm. If the two  
20 measures are dissimilar with more than 0,5 kg, then the measurement is repeated a third  
21 time. The patient is weighed fully dressed and one kilo is subtracted from each measure.  
22  
23 *Hip circumference* is measured on the skin on the crest of the hipbone. The patient is asked  
24 to place a finger in the belly bottom and the measure is done with a tape measure (2  
25 meters) placed on the upper side of the patients' finger. If the two measures are dissimilar  
26 with more than 0,5 cm, then the measurement is repeated a third time.  
27  
28  
29  
30  
31  
32  
33  
34  
35  
36  
37  
38  
39  
40  
41

#### 42 **Safety criteria and adverse events**

43  
44 Patients are informed that performing the InterWalk walking test may cause some degree of  
45 breathlessness as patients are expected to reach 80-85% of VO<sub>2</sub>-peak during the walking test.  
46  
47

48 All other measurements are not associated with any known risk or discomfort. Injuries  
49 linked to the intervention are registered, if informed to the health professionals at the health  
50  
51  
52  
53  
54  
55  
56  
57  
58  
59  
60

1  
2  
3  
4  
5  
6  
7  
8  
9 promotion centres, during the trial period. In case of severe adverse events, the Scientific  
10 Ethical Committee of the Capital Region of Denmark is informed.  
11  
12

### 13 14 15 **Sample size considerations** 16

17 The minimum difference of interest (MDI) is 10 minutes per day. Based on existing  
18 experimental evidence, we expect the standard deviation (SD) of the change in moderate-  
19 and-vigorous physical activity from baseline to 12 month follow up to be between 1.2 – 2.3  
20 times the effect size.[49,50] Therefore, SD twice the MDI (20 min of moderate-and-  
21 vigorous physical activity) per day was applied in the sample size calculations. After  
22 applying Bonferroni adjustment due to multiple comparisons in the three group trial a total  
23 of 190 participants are needed to obtain a statistical power (1- $\beta$ ) of 80% with an  $\alpha$  of 0.017  
24 (two-tailed). Allowing for an attrition rate of 30%, 272 patients (91 in the control group  
25 and 181 in experimental group) are recruited. The setting enables recruitment until  
26 December 15<sup>st</sup> 2016. The sample size is truncated at 272 participants or the N reached at  
27 the end of recruitment period - whatever is reached first (see section 'Participants').  
28  
29  
30  
31  
32  
33  
34  
35  
36  
37  
38  
39  
40  
41  
42  
43

### 44 **Randomisation, sequence generation and allocation concealment** 45

46 After returning the physical activity monitors patients are randomised to either standard care  
47 or experimental group after baseline test (phase one). Allocation to either IWTgroup or  
48 IWTsupport-group on patients allocated to the experimental group is concealed until after  
49  
50  
51  
52  
53  
54  
55  
56  
57  
58  
59  
60



1  
2  
3  
4  
5  
6  
7  
8  
9 the post intervention test (phase two). A health professional associated with the trial,  
10 telephones the patient and inform about random allocation after returning the PA monitors to  
11 either IWT-group or IWTsupport-group. The patients are stratified by gender to ensure an  
12 equal number across all groups. The allocation sequence is generated through a standardised  
13 computer program by an independent researcher (RC). The allocation sequence is concealed  
14 until the trial arms are assigned. A Flow of patients is depicted in Figure 2.  
15  
16  
17  
18  
19  
20  
21  
22

### 23 **Blinding**

24  
25 The scientific staff is blinded to patient allocation from baseline to the 52-week follow-up is  
26 completed for all patients. The health professionals at the promotion centre are not blinded  
27 to allocation to either standard care or experimental groups.  
28  
29  
30  
31  
32  
33

### 34 **Statistical methods**

35  
36 All analyses will be conducted according to the Intention-To-Treat principle. Continuous  
37 endpoints will be analysed using repeated measures analysis of covariance in a mixed  
38 linear model. Categorical and dichotomous end points will be analysed with the use of  
39 logistic regression. The model will include with group, and sex as fixed effects, with the  
40 baseline value as a covariate.  
41  
42  
43  
44  
45  
46  
47

48 All patients randomised to one treatment, will be analysed according to the treatment to  
49 which the patient was allocated, irrespective of whether they received this or some other  
50 treatment, or no treatment at all. The ITT population will be handled all patients randomised  
51  
52  
53  
54  
55  
56  
57  
58  
59  
60

1  
2  
3  
4  
5  
6  
7  
8  
9  
10  
11  
12  
13  
14  
15  
16  
17  
18  
19  
20  
21  
22  
23  
24  
25  
26  
27  
28  
29  
30  
31  
32  
33  
34  
35  
36  
37  
38  
39  
40  
41  
42  
43  
44  
45  
46  
47  
48  
49  
50  
51  
52  
53  
54  
55  
56  
57  
58  
59  
60

to the three treatment arms, and the dataset is equal to the “all patients randomized set” (APRS). Missing values due to patients’ absence from follow-ups or withdrawal from the study are to be expected in clinical trials. Several approaches are described for handling missing data in the ITT analysis, and among them “baseline observation carried forward” (BOCF: i.e., a null-responder imputation, where the level at baseline is also considered the last). A linear mixed model analysis includes all patients with a baseline assessment, and includes both fixed and random factors. Thus, repeated linear mixed model method is chosen for the primary analyses in this trial (i.e., no data imputation), whereas the BOCF imputation, as well as the ‘Per Protocol’ population will be applied for the purpose of sensitivity analysis. Also, we will explore whether potentially important covariates such as age, sex, disease duration, degree of overweight (using BMI), and smoking status at enrollment/baseline could potentially confound the results from the primary analyses (i.e. an extra pre-specified sensitivity analysis). Exploratory analyses of the treatment effects will be performed on some the secondary outcomes.

#### ***Data management and quality control***

All data are entered in an SSL-secured, online-based database developed by the Danish Stakeholder Help2Run (CVR: 34801088). The online-based database logistically handles the data gathered at baseline, after intervention in phase one, and during follow-up (phase two) and after 52 weeks. Data on demography, measurements, tests and questionnaires are

1  
2  
3  
4  
5  
6  
7  
8  
9 entered directly in the database available via a project-specific  
10 homepage ([http://www.runsafe.dk/mtd/login/admin-](http://www.runsafe.dk/mtd/login/admin-signi)  
11 [https://www.runsafe.dk/mtd/login/admin-](https://www.runsafe.dk/mtd/login/admin-signin)  
12 [signihttps://www.runsafe.dk/mtd/login/admin-signin](https://www.runsafe.dk/mtd/login/admin-signin)). A protected back-end system  
13 (<https://www.runsafe.dk/mtd/admin>) is used to logistically handle information on  
14 demography, measurements, tests and questionnaires on each participant in the trial (for  
15 information on Interval Walking Training using the InterWalk app see '*Interval Walking*  
16 *Training using The InterWalk Application*'). The system was approved in 2014 after an  
17 inspection by the Danish Data Protection Agency. Access to personalized data from  
18 the InterWalk participants is only possible using a personalized username and password.  
19 Only specified researchers are allowed to administrate the back-end system and each  
20 researcher and project member with access to the back-end has a unique username and  
21 personal password for the back-end system. All activities, including changing data and  
22 downloading data, in the back-end system are logged in accordance with the rules and  
23 regulations from the Danish Data Protection Agency. A unique subject ID number will be  
24 subscribed to all patients in order to anonymize data. The identification key (ID to personal  
25 information) will be encrypted and stored securely and separately from the unique ID  
26 number on a secure database.  
27  
28  
29  
30  
31  
32  
33  
34  
35  
36  
37  
38  
39  
40  
41  
42  
43  
44  
45  
46  
47

### ***Ethics and Dissemination***

48  
49  
50 The InterWalk trial contributes with important knowledge on different treatment approaches  
51 in the rehabilitation of patients with T2D. Physical activity and exercise have beneficial  
52  
53  
54  
55  
56  
57  
58  
59  
60

1  
2  
3  
4  
5  
6  
7  
8  
9 effect on patients with T2D when the interventions are conducted in well-designed efficacy  
10 studies.[2,4,6] However, little is known on whether this effect also is present in effectiveness  
11 studies or “real-world setting” studies. These studies are of great importance and relevance  
12 regarding evidence-based medicine highlighting the importance of the InterWalk trial.  
13  
14

15  
16  
17 The InterWalk trial has a pragmatic design that allows for different  
18 intervention periods in the participating municipalities. Furthermore, the interventions are  
19 conducted directly in the clinical setting giving a more reliable frame of the experienced  
20 challenges in a population with T2D. We believe that the implementation of the study results  
21 will have a smoother implementation phase, as the health professionals already are familiar  
22 with the preceding’s.  
23  
24  
25  
26  
27  
28  
29

30  
31 The trial gives valuable insight into the impact of different motivational and  
32 supportive tools as well as knowledge about individual motivation and the impact on  
33 sustaining a newly acquired behaviour change regarding physical activity in everyday life.  
34  
35  
36

37 Interval Walking Training is expected to be a suitable and effective way of  
38 providing moderate-vigorous physical activity for at large group of patients with T2D. IWT  
39 can be done at any time and anywhere and is thus integrated and tailored to fit individual  
40 everyday life. The overall objective is to promote lifelong physical activity for the individual  
41 and we believe that experiences from the present trial can help when planning future  
42 interventions with IWT to patients with various lifestyle diseases e.g. coronary heart  
43 diseases.  
44  
45  
46  
47  
48  
49  
50  
51  
52  
53  
54  
55  
56  
57  
58  
59  
60

1  
2  
3  
4  
5  
6  
7  
8  
9  
10  
11  
12  
13  
14  
15  
16  
17  
18  
19  
20  
21  
22  
23  
24  
25  
26  
27  
28  
29  
30  
31  
32  
33  
34  
35  
36  
37  
38  
39  
40  
41  
42  
43  
44  
45  
46  
47  
48  
49  
50  
51  
52  
53  
54  
55  
56  
57  
58  
59  
60

It is a major advantage that the trial is designed as a randomised controlled trial in a “real-world setting” with a study population representing patients with T2D referred to rehabilitation. Furthermore, data and results are collected consecutively and directly in the clinical setting in which the interventions are to be used after the trial. Together with the very limited number of inclusion and exclusion criteria and a stratification of patients on gender secures external validity of the trial and thus will add important information to the current body of evidence on T2D treatment.

All data from eHealth solutions as the InterWalk app are electronically monitored. The patient is not dependent on opening hours at the health promotion centre as the InterWalk is either installed on an iPhone or an iPod. This gives a unique possibility for the patient to be physically active whenever it fits in their everyday life.

We acknowledge that physical activity only has effect when adherence is high, which is why we first compare standard care with interval walking for a shorter period (phase one) followed by a re-allocation of patients in the experimental group to either interval walking with or without motivational support (phase two). All groups have a 52-week follow-up. The trial design enables us to investigate if patients are able to maintain a newly acquired behaviour change with physical activity in everyday life with or without motivational support for a longer period.

All personalized data and measures are stored on a central online-based database developed to logistically handle all data collected at baseline and during follow-

## Effect of Interval walking on type 2 diabetics

BMJ Open

1  
2  
3  
4  
5  
6  
7  
8  
9 up. The backend system (<https://www.runsafe.dk/mtd/admin/>) secures all information  
10 from each patient. The construction of the database with personalized usernames,  
11 passwords, and specific permissions to all health professionals and administering  
12 permissions to scientific staff in the backend secures all data. Furthermore, all activities are  
13 logged.  
14  
15  
16  
17  
18

19 All outcomes measures are assessed blinded to allocation at baseline and the  
20 primary outcome is assessed blinded to intervention in the experimental group after the  
21 intervention period. All measures are conducted by the health professionals at the health  
22 promotion centres and are blinded for allocation after intervention in the experimental group  
23 with IWT until after return of the physical activity monitors by the patient. All statistical  
24 analyses are blinded to researchers, reducing the risk of detection and interpretation  
25 bias.[51–53] All secondary outcomes, but VO<sub>2</sub>-peak and the Sit to Stand Test are self-  
26 reported and by nature likely to be biased. The patients answer questionnaires independently  
27 of the health professionals at the health promotion centres.  
28  
29  
30  
31  
32  
33  
34  
35  
36  
37  
38

39 The secondary outcomes of motivation for physical activity and behaviour  
40 change are of highly importance as knowledge concerning motivational support and  
41 maintenance of effect (new habits with physical activity) to our knowledge is lacking in  
42 patients with T2D. This knowledge will help health professionals to better tailor the  
43 treatment and herby potentially achieve a higher adherence to the programme following the  
44 supervised intervention.  
45  
46  
47  
48  
49  
50  
51  
52  
53  
54  
55  
56  
57  
58  
59  
60

1  
2  
3  
4  
5  
6  
7  
8  
9 The limitations in this trial are similar to those of other exercise trials where  
10 physical testing and time-of-day and day-to-day variation constitute a challenge. We have  
11 standardised all testing protocols for all procedures to reduce the variation and run a  
12 routine program of on-going calibration and training of the health professionals.  
13  
14  
15  
16

17 The trial is conducted in accordance with the Helsinki Declaration II.[54] All  
18 eligible patients receive written and oral informed consent prior to inclusion before any  
19 additional trial procedures. Data on all screened patients are registered in order to report  
20 characteristics of in-eligible patients and written informed consent is also obtained from  
21 these patients. The patients can withdraw from the trial at all times during the trial period.  
22 This has no consequence for any other future treatment. If patients discontinue the trial  
23 intervention, standard care is offered for the rest of the intervention period. All results from  
24 the trial, negative, positive or inconclusive results, are disseminated in international peer-  
25 reviewed scientific papers and at national and international conferences. We follow the  
26 guidelines from the International Committee of Medical Journal Editors when authorship is  
27 determined. The results will be reported when all long-term data become accessible.  
28  
29  
30  
31  
32  
33  
34  
35  
36  
37  
38  
39  
40  
41

42 Furthermore, all results are shared with the participating municipalities and  
43 participating health professionals and are used to develop future intervention and  
44 implementation strategies in the Danish municipalities.  
45  
46  
47  
48  
49

## 50 **Trial status**

51  
52  
53  
54  
55  
56  
57  
58  
59  
60

1  
2  
3  
4  
5  
6  
7  
8  
9 The inclusion period started in January 2015 and is scheduled to finish in December 2017  
10 with a 52-week follow-up. To ensure enrolment of patients in the trial we are open for  
11 collaborations with new municipalities during the trial period. So far the trial has resulted  
12 in collaboration with both rural and urban municipalities in Denmark. The inclusion rate is  
13 carefully monitored every week by the research team. In November 2016, 216 patients had  
14 been enrolled in the trial.  
15  
16  
17  
18  
19  
20  
21  
22  
23

24 **Contributors** LSV, MR-L and HL drafted the manuscript. All authors made substantial  
25 contributions to conception and design, and revised the manuscripts critically for important  
26 intellectual content. All authors have given their approval for the manuscript to be  
27 published.  
28  
29  
30  
31  
32  
33  
34

35 **Funding.** The work has been supported by two grants by the Tryg Foundation, Denmark.  
36 The Centre for Physical Activity Research (CFAS) is supported by a grant from  
37 TrygFonden. The study was further supported by grants from. The Augustinus Foundation  
38 and two Foundations in the Capital Region of Denmark – the Foundation for Prevention  
39 and the Foundation for Intersectorial Research Projects have also supported the work.  
40  
41  
42  
43  
44  
45

46 Laura Staun Valentiner is supported by a grant from the Municipality of Copenhagen,  
47 Denmark and The Danish Physiotherapist Foundation. Mathias Ried-Larsen is supported  
48 by a post-doctoral grant from the Danish Diabetes Academy supported by the Novo  
49  
50  
51  
52  
53  
54  
55  
56  
57  
58  
59  
60



1  
2  
3  
4  
5  
6  
7  
8  
9 Nordisk Foundation and The Vissing Foundation. CIM/CFAS is a member of DD2 - the  
10 Danish Center for Strategic Research in Type 2 Diabetes (the Danish Council for Strategic  
11 Research, grant no. 09-067009 and 09-075724). Robin Christensen is supported by grants  
12 from The Oak Foundation. Henning Langberg is supported by a professor grant from the  
13 Municipality of Copenhagen, Denmark.  
14  
15  
16  
17  
18  
19  
20  
21

### 22 **Ethics approval**

23  
24 The local regional Research Ethics Committee in Denmark (H-1-2014-074) and the Danish  
25 Data Protection Agency (j.nr. 2014-54-0897) has approved the trial.  
26  
27  
28  
29  
30

### 31 **Acknowledgement**

32  
33 The authors thank the health professionals in the Municipalities of Copenhagen and  
34 Guldborgsund and Bornholm Hospital in Denmark for helping recruit, test and train with  
35 all patients in the study.  
36  
37  
38  
39  
40  
41

### 42 **Competing interests statement**

43  
44 We have read and understood The BMJ policy on declaration of interests and declare no  
45 competing interests.  
46  
47  
48  
49  
50  
51  
52  
53  
54  
55  
56  
57  
58  
59  
60

## REFERENCES

- 1 Colberg, SR, Sigal, RJ, Fernhall, B, Regensteiner, JG, Blissmer, B, Rubin, RRR, Chanan-Taber, L, Albright, AL, Braun B. Exercise and Type 2 Diabetes. *Diabetes Care* 2010;**33**:2692–6. doi:10.2337/dc10-1548
- 2 Plotnikoff RC, Costigan S a., Karunamuni ND, *et al.* Community-based physical activity interventions for treatment of type 2 diabetes: A systematic review with meta-analysis. *Front Endocrinol (Lausanne)* 2013;**4**:1–17. doi:10.3389/fendo.2013.00003
- 3 Umpierre D, Kramer CK, Leita CB, *et al.* CLINICIAN ' S CORNER Physical Activity Advice Only or Structured With HbA 1c Levels in Type 2 Diabetes. *JAMA* 2013;**305**:190–9.
- 4 Nicolucci A, Balducci S, Cardelli P, *et al.* Relationship of exercise volume to improvements of quality of life with supervised exercise training in patients with type 2 diabetes in a randomised controlled trial : the Italian Diabetes and Exercise Study ( IDES ). *Diabetologica* 2012;**55**:579–88. doi:10.1007/s00125-011-2425-9
- 5 Vadstrup ES, Frølich A, Perrild H, *et al.* Health-related quality of life and self-related health in patients with type 2 diabetes : Effects of group-based rehabilitation versus individual counselling. *Health Qual Life Outcomes* 2011;**9**:110. doi:10.1186/1477-7525-9-110
- 6 Avery L, Flynn D, Van Wersch A, *et al.* Changing physical activity behavior in type 2 diabetes: A systematic review and meta-analysis of behavioral interventions. *Diabetes Care* 2012;**35**:2681–9. doi:10.2337/dc11-2452
- 7 Umpierre D, Kramer CK, Leita CB, *et al.* Physical Activity Advice Only or Structured. *JAMA* 2011;**305**:1790–9.
- 8 Shaw JE, Sicree R a., Zimmet PZ. Global estimates of the prevalence of diabetes for 2010 and 2030. *Diabetes Res Clin Pract* 2010;**87**:4–14. doi:10.1016/j.diabres.2009.10.007
- 9 Whiting DR, Guariguata L, Weil C, *et al.* IDF Diabetes Atlas: Global estimates of the prevalence of diabetes for 2011 and 2030. *Diabetes Res Clin Pract* 2011;**94**:311–21. doi:10.1016/j.diabres.2011.10.029
- 10 Cochrane Collaboration. Special Colection: Health of Indigenous peoples: diabetes. [http://www.cochranelibrary.com/app/content/special-collections/article/?doi=10.1002/\(ISSN\)14651858\(CAT\)Freeaccesstoreviews\(VI\)indigenoushealthdiabetes](http://www.cochranelibrary.com/app/content/special-collections/article/?doi=10.1002/(ISSN)14651858(CAT)Freeaccesstoreviews(VI)indigenoushealthdiabetes). 2015.
- 11 Policy EHealth, Europa.eu.
- 12 Di Loreto C, Fanelli C, Lucidi P, *et al.* Make Your Diabetic Patients Walk. *Diabetes Care* 2005;**28**:1295–302. doi:10.2337/diacare.28.6.1295

- 1  
2  
3  
4  
5  
6  
7  
8  
9  
10  
11  
12  
13  
14  
15  
16  
17  
18  
19  
20  
21  
22  
23  
24  
25  
26  
27  
28  
29  
30  
31  
32  
33  
34  
35  
36  
37  
38  
39  
40  
41  
42  
43  
44  
45  
46  
47  
48  
49  
50  
51  
52  
53  
54  
55  
56  
57  
58  
59  
60
- 13 Eakin EG, Reeves MM, Lawler SP, *et al.* The Logan Healthy Living Program: A cluster randomized trial of a telephone-delivered physical activity and dietary behavior intervention for primary care patients with type 2 diabetes or hypertension from a socially disadvantaged community - Rationale, d. *Contemp Clin Trials* 2008;**29**:439–54. doi:10.1016/j.cct.2007.10.005
- 14 Tatara N, Årsand E, Bratteteig T, *et al.* Usage and perceptions of a mobile self-management application for people with type 2 diabetes: Qualitative study of a five-month trial. *Stud Health Technol Inform* 2013;**192**:127–31. doi:10.3233/978-1-61499-289-9-127
- 15 Karstoft K, Winding K, Knudsen SH, *et al.* The Effects of Free-Living Interval-Walking Training on Glycemic Control, Body Composition, and Physical Fitness in Type 2 Diabetic Patients. *Diabetes Care* 2013;**36**:228–36. doi:10.2337/dc12-0658.
- 16 Ried-larsen M, Thomsen RW, Berencsi K, *et al.* Implementation of interval walking training in patients with type 2 diabetes in Denmark : rationale , design , and baseline characteristics. *Clinical Epidemiol* 2016;**8**:201–9.
- 17 Saida, T. Langberg H. *Self-Reported adherence to physical activity following physical activity referral scheme & objective measured physical activity in self-referred subgroup: A pragmatic 12 month follow-up study.* 2014.
- 18 Ogden J, Hills L. Understanding sustained behavior change: the role of life crises and the process of reinvention. *Health (London)* 2008;**12**:419–37. doi:10.1177/1363459308094417
- 19 Chan A-W, Tetzlaff JM, Gøtzsche PC, *et al.* SPIRIT 2013 explanation and elaboration: guidance for protocols of clinical trials. *BMJ* 2013;**346**:e7586. doi:10.1136/bmj.e7586
- 20 Schulz KF, Altman DG, Moher D, *et al.* Academia and Clinic Annals of Internal Medicine CONSORT 2010 Statement : Updated Guidelines for Reporting Parallel Group Randomized Trials OF TO. *Ann Intern Med* 2010;**1996**:727–32. doi:10.7326/0003-4819-152-11-201006010-00232
- 21 Thomsen RW, Nielsen JS, Ulrichsen SP, *et al.* The Danish Centre for Strategic research in type 2 diabetes (dd2) study: Collection of baseline data from the first 580 patients. *Clin Epidemiol* 2012;**4**:43–8. doi:10.2147/clep.s30083
- 22 Thygesen LC, Daasnes C, Thaulow I, *et al.* Introduction to Danish (nationwide) registers on health and social issues: Structure, access, legislation, and archiving. *Scand J Public Health* 2011;**39**:12–6. doi:10.1177/1403494811399956
- 23 Bodenheimer, Thomas. Wagner, Edward H. Grumbach K. Improving Primary Care for Patient With Chronic Illness, The Chonic Care Model, Part 2. *JAMA - J Am Med Assoc* 2002;**288**:1909–14.

## Effect of Interval walking on type 2 diabetics

## BMJ Open

- 1  
2  
3  
4  
5  
6  
7  
8  
9  
10  
11  
12  
13  
14  
15  
16  
17  
18  
19  
20  
21  
22  
23  
24  
25  
26  
27  
28  
29  
30  
31  
32  
33  
34  
35  
36  
37  
38  
39  
40  
41  
42  
43  
44  
45  
46  
47  
48  
49  
50  
51  
52  
53  
54  
55  
56  
57  
58  
59  
60
- 24 Pedersen BK, Saltin B. Evidence for prescribing exercise as therapy in chronic disease. *Insulin* 2006;**16**:3–63. doi:10.1111/j.1600-0838.2006.00520.x
- 25 Brinkloe, Cecilie Fau. Thorsen, Ida Kær. Karstoft, Kristian. Brøns, Charlotte. Valentiner, Laura. Langberg, Henning. Vaag, Allan Arthur, Nielsen, Jens Steen. Pedersen, Bente Klarlund. Ried-Larsen M. Criterion validity and reliability of a smartphone delivered sub-maximal fitness test for people with type 2 diabetes. *Submitt 2016*
- 26 Miller, WR. Rollnick S. *Motivational Interviewing: Preparing People for Change*. 2nd. New York, NY: Guilford Press 2002.
- 27 Chen SM, Creedy D, Lin H-S, *et al*. Effects of motivational interviewing intervention on self-management, psychological and glycemc outcomes in type 2 diabetes: A randomized controlled trial. *Int J Nurs Stud* 2012;**49**:637–44. doi:10.1016/j.ijnurstu.2011.11.011
- 28 Locke EA. Toward a Theory of Task Motivation and Incentives 1. *Organ Behav Hum Perform* 1968;**189**:157–89.
- 29 Locke EA, Latham GP. New Directions in Goal-Setting Theory. *SAGE* 2006;**15**:265–8.
- 30 Fjeldsoe BS, Marshall AL, Miller YD. Behavior Change Interventions Delivered by Mobile Telephone Short-Message Service. *Am J Prev Med* 2009;**36**:165–73. doi:10.1016/j.amepre.2008.09.040
- 31 Kongstad, Malte Bue. Valentiner, Laura Staun. Ried-Larsen, Mathias. Walker, Karen Christina. Juhl, Carsten Bogh. Langberg H. Effectiveness of remote feedback on physical activity in patients with type 2 diabetes: a systematic review and meta-analysis of randomized controlled trials. *Submitt 2016*
- 32 Ryan R, Deci E. Intrinsic and Extrinsic Motivations: Classic Definitions and New Directions. *Contemp Educ Psychol* 2000;**25**:54–67. doi:10.1006/ceps.1999.1020
- 33 Shaya T. F, Chirikov V. V, Howard D, *et al*. Effect of social networks intervention in type 2 diabetes: a partial randomised study. *J Epidemiol Community Heal* 2014;**68**:326–32. doi:10.1136/jech-2013-203274
- 34 Paul G, Keogh K, D'Eath M, *et al*. Implementing a peer-support intervention for people with type 2 diabetes: A qualitative study. *Fam Pract* 2013;**30**:593–603. doi:10.1093/fampra/cmt027
- 35 Drivsholm, Thomas Bo. Snorgaard O. Organisation of treatment and follow up of patients with type 2 diabetes. *J Danish Med Assoc* 2012;**174**:2159–62.
- 36 Snowling NJ, Hopkins WG. Reviews / Commentaries / ADA Statements Effects of Different Modes of Exercise Training on Glucose Control and Risk Factors for

- 1  
2  
3  
4  
5  
6  
7  
8  
9 Complications in Type 2. *Diabetes Care* 2006;**29**:2518–27. doi:10.2337/dc06-1317
- 10 37 Ajala O, English P, Pinkney J. Systematic review and meta-analysis of different  
11 dietary approaches to the management of type 2 diabetes 1 – 3. *Am J Clin Nutr*  
12 2013;**97**:505–16. doi:10.3945/ajcn.112.042457.Am
- 13  
14 38 Evert AB, Boucher JL, Marjorie. C, *et al.* Nutrition Therapy Recommendations for  
15 the Management of Adults With Diabetes. *Diabetes Care* 2013;**36**:3821–42.  
16 doi:10.2337/dc13-2042
- 17  
18 39 Palmer SC, Mavridis D, Nicolucci A, *et al.* Comparison of Clinical Outcomes and  
19 Adverse Events Associated With Glucose-Lowering Drugs in Patients With Type 2  
20 DiabetesA Meta-analysis. *JAMA* 2016;**316**:313–24. doi:10.1001/jama.2016.9400
- 21  
22 40 Jensen, Natasja K. Christensen, KARL B. Mortensen Erik L. Valentiner, Laura S.  
23 Langberg H. Validation of the Behavioral Regulation for Exercise Questionnaire in  
24 Danish: measuring of motivation for exercise in people living with diabetes. *Prep*  
25 2016.
- 26  
27 41 Valentiner, Laura Staun. Egerod, Ingrid. Molin, Katrine Rutkær. Bahari-Bandari,  
28 Samareh. Langberg H. Patients with type 2 diabetes choose quality of life over health:  
29 a focus group investigation. *Submitt 2016*
- 30  
31 42 Ware, John E, Kosinski Mark KS. A 12-Item Short-Form Health Survey:  
32 CONstruction of Scales and Preliminary Tests of Reliability and Validity. *Med Care*  
33 1996;**34(3)**:220–33.
- 34  
35 43 Gardner B. A review and analysis of the use of “habit” in understanding, predicting  
36 and influencing health-related behaviour. *Health Psychol Rev* 2014;**1**–19.  
37 doi:10.1080/17437199.2013.876238
- 38  
39 44 Gardner B, Abraham C, Lally P, *et al.* Towards parsimony in habit measurement:  
40 Testing the convergent and predictive validity of an automaticity subscale of the Self-  
41 Report Habit Index. *Int J Behav Nutr Phys Act* 2012;**9**:102. doi:10.1186/1479-5868-9-  
42 102
- 43  
44 45 Jones CJ, Rikli RE, Beam WC. A 30-s Chair-Stand Test as a Measure of Lower Body  
45 Strength in Community-Residing Older Adults. *Res Q Exerc Sport* 1999;**70**:113–9.  
46 doi:10.1080/02701367.1999.10608028
- 47  
48 46 Golubic R, May AM, Benjaminsen Borch K, *et al.* Validity of Electronically  
49 Administered Recent Physical Activity Questionnaire (RPAQ) in Ten European  
50 Countries. *PLoS One* 2014;**9**:e92829. doi:10.1371/journal.pone.0092829
- 51  
52 47 Mortensen EL, Flensburg-Madsen T, Molbo D, *et al.* Personality in Late Midlife:  
53 Associations With Demographic Factors and Cognitive Ability. *J Aging Health*  
54 2014;**26**:21–36. doi:10.1177/0898264313519317
- 55  
56  
57  
58  
59  
60

## Effect of Interval walking on type 2 diabetics

BMJ Open

- 1  
2  
3  
4  
5  
6  
7  
8  
9  
10  
11  
12  
13  
14  
15  
16  
17  
18  
19  
20  
21  
22  
23  
24  
25  
26  
27  
28  
29  
30  
31  
32  
33  
34  
35  
36  
37  
38  
39  
40  
41  
42  
43  
44  
45  
46  
47  
48  
49  
50  
51  
52  
53  
54  
55  
56  
57  
58  
59  
60
- 48 Zuckerman M, Kolin EA, Price L, *et al.* DEVELOPMENT OF A SENSATION-SEEKING SCALE x. 1964;**28**:477–82.
- 49 Kirk A, Mutrie N, MacIntyre P, *et al.* Effects of a 12-month activity counselling intervention on glycaemic control and on the status of cardiovascular risk factors in people with Type 2 diabetes. *Diabetologia*. 2004;**47**:821–32. doi:10.1007/s00125-004-1396-5
- 50 De Greef K, Deforche B, Tudor-Locke C, *et al.* A cognitive-behavioural pedometer-based group intervention on physical activity and sedentary behaviour in individuals with type 2 diabetes. *Health Educ Res* 2010;**25**:724–36.<http://ovidsp.ovid.com/ovidweb.cgi?T=JS&PAGE=reference&D=psyc7&NEWS=N&AN=2010-18970-002>
- 51 Savovic J, Jones HE, Altman DG, *et al.* Influence of reported study design characteristics on intervention effect estimates from randomized, controlled trials. *Ann Intern Med* 2012;**157**:429–38. doi:10.7326/0003-4819-157-6-201209180-00537
- 52 Wood L, Egger M, Gluud LL, *et al.* Empirical evidence of bias in treatment effect estimates in controlled trials with different interventions and outcomes: meta-epidemiological study. *Bmj* 2008;**336**:601–5. doi:10.1136/bmj.39465.451748.AD
- 53 Gluud LL. Bias in clinical intervention research. *Am J Epidemiol* 2006;**163**:493–501. doi:10.1093/aje/kwj069
- 54 World Medical Association. World Medical Association Declaration of Helsinki: Ethical Principles for Medical Research Involving Human Subjects. *Clin Rev* 2013;**6**–9.

**FIGURE LEGENDS****Figure 1.** Timeline and overview of interventions in the InterWalk trial

Phase one shows baseline-test, randomization, intervention and test after intervention. Phase two shows the re-allocation of patients in the experimental group who do Interval Walking Training (IWT with the InterWalk app to either IWT with or without motivational support form a health professional. All patients are tested at baseline, after intervention and again at follow-up at 52 weeks

**Figure 2.** Flowchart, The InterWalk-RCT Trial

**Figure 3.** The InterWalk front page (A), Protocol for the fitness test in the application (B), The start page for interval walking showing smileys as direct feedback to the user (C) (translated from Danish).[16]

**Figure 4.** Short Message Service (SMS), send every Sunday to patients in the IWTsupport-group

**Figure 5.** Short Message Service (SMS), Standardized walking test in the InterWalk application, send every fourth week to patients in the IWTsupport-group



Figure 1. Timeline and overview of interventions in the InterWalk trial  
 Phase one shows baseline-test, randomisation, intervention and test after intervention. Phase two shows the re-allocation of patients in the experimental group who do Interval Walking Training (IWT with the InterWalk app to either IWT with or without motivational support from a health professional. All patients are tested at baseline, after intervention and again at follow-up at 52 weeks

254x190mm (300 x 300 DPI)

only



1  
2  
3  
4  
5  
6  
7  
8  
9  
10  
11  
12  
13  
14  
15  
16  
17  
18  
19  
20  
21  
22  
23  
24  
25  
26  
27  
28  
29  
30  
31  
32  
33  
34  
35  
36  
37  
38  
39  
40  
41  
42  
43  
44  
45  
46  
47  
48  
49  
50  
51  
52  
53  
54  
55  
56  
57  
58  
59  
60

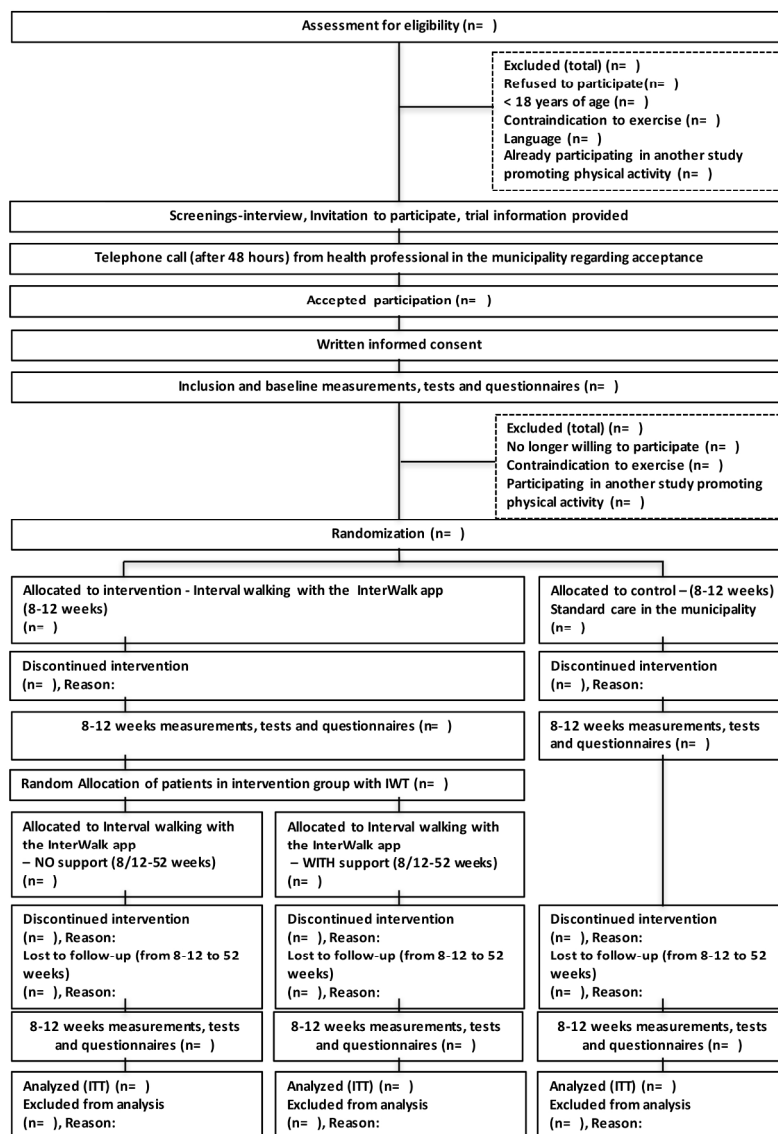

Figure 2. Flowchart, The InterWalk-RCT Trial

190x254mm (300 x 300 DPI)

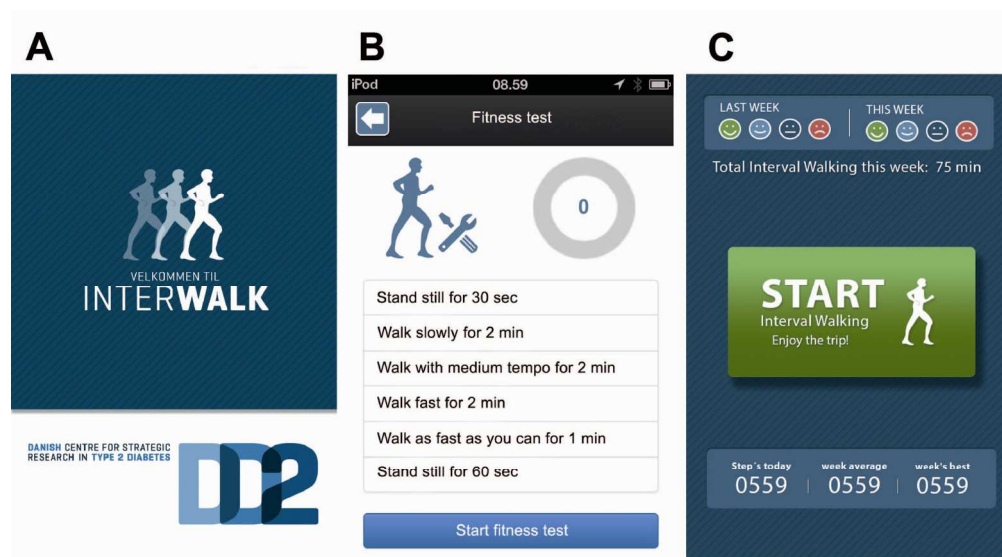

Figure 3. The InterWalk front page (A), Protocol for the fitness test in the application (B), The start page for interval walking showing smileys as direct feedback to the user (C) (translated from Danish).[16]

725x399mm (72 x 72 DPI)

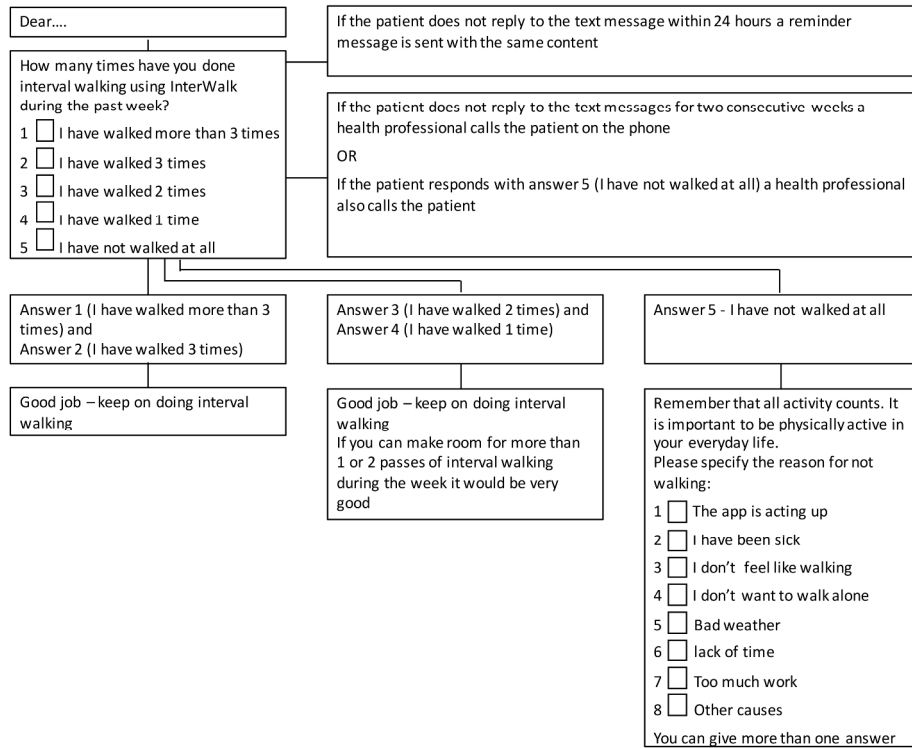

Figure 4. Short Message Service (SMS), send every Sunday to patients in the IWTsupport-group

254x190mm (300 x 300 DPI)

Peer Review Only

Short Message Service (SMS)  
Standardized Walking test in the InterWalk application



Figure 5. Short Message Service (SMS), Standardized walking test in the InterWalk application, send every fourth week to patients in the IWTsupport-group

338x190mm (300 x 300 DPI)



To BMJ Open

As the senior author of the published paper "*Implementation of interval walking training in patients with type 2 diabetes in Denmark: rationale, design, and baseline characteristics*" I hereby approve the use figure A, B and C in paper "*The long-term effect of smartphone-delivered Interval Walking Training on physical activity in patients with type 2 diabetes: protocol for a parallel group single-blinded randomized controlled trial*" submitted to BMJ Open by Laura Valentiner.

Original publication of the figures:

"*Implementation of interval walking training in patients with type 2 diabetes in Denmark: rationale, design, and baseline characteristics*. Ried-Larsen M, Thomsen RW, Berencsi K, Brinkløv CF, Brøns C, Valentiner LS, Karstoft K, Langberg H, Vaag AA, Pedersen BK, Nielsen JS. Clin Epidemiol. 2016 Jun 8;8:201-9. doi: 10.2147/CLEP.S97303. eCollection 2016."

Kind regards

PhD Jens Steen Nielsen

2016-08-17

A handwritten signature in blue ink, appearing to read 'Jens Steen Nielsen', with a long horizontal stroke extending to the right.

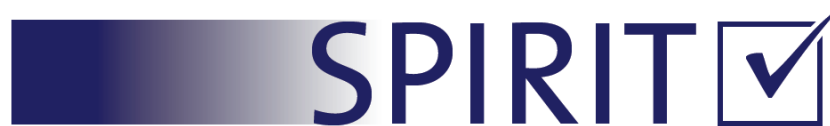

STANDARD PROTOCOL ITEMS: RECOMMENDATIONS FOR INTERVENTIONAL TRIALS

SPIRIT 2013 Checklist: Recommended items to address in a clinical trial protocol and related documents\*

| Section/item                                              | Item No | Description                                                                                                                                                                                                                                                                              | Page                                  |
|-----------------------------------------------------------|---------|------------------------------------------------------------------------------------------------------------------------------------------------------------------------------------------------------------------------------------------------------------------------------------------|---------------------------------------|
| <b>Administrative information</b>                         |         |                                                                                                                                                                                                                                                                                          |                                       |
| Title                                                     | 1       | Descriptive title identifying the study design, population, interventions, and, if applicable, trial acronym                                                                                                                                                                             | 1                                     |
| Trial registration                                        | 2a      | Trial identifier and registry name. If not yet registered, name of intended registry                                                                                                                                                                                                     | 5 & 11                                |
|                                                           | 2b      | All items from the World Health Organization Trial Registration Data Set                                                                                                                                                                                                                 | N/A                                   |
| Protocol version                                          | 3       | Date and version identifier                                                                                                                                                                                                                                                              | N/A                                   |
| Funding                                                   | 4       | Sources and types of financial, material, and other support                                                                                                                                                                                                                              | 44-45                                 |
| Roles and responsibilities                                | 5a      | Names, affiliations, and roles of protocol contributors                                                                                                                                                                                                                                  | 1-3 & 44                              |
|                                                           | 5b      | Name and contact information for the trial sponsor                                                                                                                                                                                                                                       | N/A                                   |
|                                                           | 5c      | Role of study sponsor and funders, if any, in study design; collection, management, analysis, and interpretation of data; writing of the report; and the decision to submit the report for publication, including whether they will have ultimate authority over any of these activities | N/A                                   |
|                                                           | 5d      | Composition, roles, and responsibilities of the coordinating centre, steering committee, endpoint adjudication committee, data management team, and other individuals or groups overseeing the trial, if applicable (see Item 21a for data monitoring committee)                         | 10-11, 13-14, 17-20, 22, 24-27, 35-38 |
| <b>Introduction</b>                                       |         |                                                                                                                                                                                                                                                                                          |                                       |
| Background and rationale                                  | 6a      | Description of research question and justification for undertaking the trial, including summary of relevant studies (published and unpublished) examining benefits and harms for each intervention                                                                                       | 4, 7-9                                |
|                                                           | 6b      | Explanation for choice of comparators                                                                                                                                                                                                                                                    | 7-9, 13-14, 17-18, 21-26              |
| Objectives                                                | 7       | Specific objectives or hypotheses                                                                                                                                                                                                                                                        | 9                                     |
| Trial design                                              | 8       | Description of trial design including type of trial (eg, parallel group, crossover, factorial, single group), allocation ratio, and framework (eg, superiority, equivalence, noninferiority, exploratory)                                                                                | 9-11                                  |
| <b>Methods: Participants, interventions, and outcomes</b> |         |                                                                                                                                                                                                                                                                                          |                                       |
| Study setting                                             | 9       | Description of study settings (eg, community clinic, academic hospital) and list of countries where data will be collected. Reference to where list of study sites can be obtained                                                                                                       | 10-11                                 |

|    |                                                                     |     |                                                                                                                                                                                                                                                                                                                                                                                |                    |
|----|---------------------------------------------------------------------|-----|--------------------------------------------------------------------------------------------------------------------------------------------------------------------------------------------------------------------------------------------------------------------------------------------------------------------------------------------------------------------------------|--------------------|
| 1  |                                                                     |     |                                                                                                                                                                                                                                                                                                                                                                                |                    |
| 2  | Eligibility criteria                                                | 10  | Inclusion and exclusion criteria for participants. If applicable, eligibility criteria for study centres and individuals who will perform the interventions (eg, surgeons, psychotherapists)                                                                                                                                                                                   | 11-13              |
| 3  |                                                                     |     |                                                                                                                                                                                                                                                                                                                                                                                |                    |
| 4  |                                                                     |     |                                                                                                                                                                                                                                                                                                                                                                                |                    |
| 5  | Interventions                                                       | 11a | Interventions for each group with sufficient detail to allow replication, including how and when they will be administered                                                                                                                                                                                                                                                     | 13-26              |
| 6  |                                                                     |     |                                                                                                                                                                                                                                                                                                                                                                                |                    |
| 7  |                                                                     |     |                                                                                                                                                                                                                                                                                                                                                                                |                    |
| 8  |                                                                     |     |                                                                                                                                                                                                                                                                                                                                                                                |                    |
| 9  |                                                                     | 11b | Criteria for discontinuing or modifying allocated interventions for a given trial participant (eg, drug dose change in response to harms, participant request, or improving/worsening disease)                                                                                                                                                                                 | N/A                |
| 10 |                                                                     |     |                                                                                                                                                                                                                                                                                                                                                                                |                    |
| 11 |                                                                     |     |                                                                                                                                                                                                                                                                                                                                                                                |                    |
| 12 |                                                                     | 11c | Strategies to improve adherence to intervention protocols, and any procedures for monitoring adherence (eg, drug tablet return, laboratory tests)                                                                                                                                                                                                                              | 13-26              |
| 13 |                                                                     |     |                                                                                                                                                                                                                                                                                                                                                                                |                    |
| 14 |                                                                     |     |                                                                                                                                                                                                                                                                                                                                                                                |                    |
| 15 |                                                                     | 11d | Relevant concomitant care and interventions that are permitted or prohibited during the trial                                                                                                                                                                                                                                                                                  | 26                 |
| 16 |                                                                     |     |                                                                                                                                                                                                                                                                                                                                                                                |                    |
| 17 | Outcomes                                                            | 12  | Primary, secondary, and other outcomes, including the specific measurement variable (eg, systolic blood pressure), analysis metric (eg, change from baseline, final value, time to event), method of aggregation (eg, median, proportion), and time point for each outcome. Explanation of the clinical relevance of chosen efficacy and harm outcomes is strongly recommended | 30-35              |
| 18 |                                                                     |     |                                                                                                                                                                                                                                                                                                                                                                                |                    |
| 19 |                                                                     |     |                                                                                                                                                                                                                                                                                                                                                                                |                    |
| 20 |                                                                     |     |                                                                                                                                                                                                                                                                                                                                                                                |                    |
| 21 |                                                                     |     |                                                                                                                                                                                                                                                                                                                                                                                |                    |
| 22 |                                                                     |     |                                                                                                                                                                                                                                                                                                                                                                                |                    |
| 23 | Participant timeline                                                | 13  | Time schedule of enrolment, interventions (including any run-ins and washouts), assessments, and visits for participants. A schematic diagram is highly recommended (see Figure)                                                                                                                                                                                               | 4, 9-10, 14, 26-30 |
| 24 |                                                                     |     |                                                                                                                                                                                                                                                                                                                                                                                |                    |
| 25 |                                                                     |     |                                                                                                                                                                                                                                                                                                                                                                                |                    |
| 26 | Sample size                                                         | 14  | Estimated number of participants needed to achieve study objectives and how it was determined, including clinical and statistical assumptions supporting any sample size calculations                                                                                                                                                                                          | 5, 36              |
| 27 |                                                                     |     |                                                                                                                                                                                                                                                                                                                                                                                |                    |
| 28 |                                                                     |     |                                                                                                                                                                                                                                                                                                                                                                                |                    |
| 29 |                                                                     |     |                                                                                                                                                                                                                                                                                                                                                                                |                    |
| 30 |                                                                     |     |                                                                                                                                                                                                                                                                                                                                                                                |                    |
| 31 | Recruitment                                                         | 15  | Strategies for achieving adequate participant enrolment to reach target sample size                                                                                                                                                                                                                                                                                            | 10-12              |
| 32 |                                                                     |     |                                                                                                                                                                                                                                                                                                                                                                                |                    |
| 33 | <b>Methods: Assignment of interventions (for controlled trials)</b> |     |                                                                                                                                                                                                                                                                                                                                                                                |                    |
| 34 |                                                                     |     |                                                                                                                                                                                                                                                                                                                                                                                |                    |
| 35 | Allocation:                                                         |     |                                                                                                                                                                                                                                                                                                                                                                                |                    |
| 36 |                                                                     |     |                                                                                                                                                                                                                                                                                                                                                                                |                    |
| 37 | Sequence generation                                                 | 16a | Method of generating the allocation sequence (eg, computer-generated random numbers), and list of any factors for stratification. To reduce predictability of a random sequence, details of any planned restriction (eg, blocking) should be provided in a separate document that is unavailable to those who enrol participants or assign interventions                       | 27-28              |
| 38 |                                                                     |     |                                                                                                                                                                                                                                                                                                                                                                                |                    |
| 39 |                                                                     |     |                                                                                                                                                                                                                                                                                                                                                                                |                    |
| 40 |                                                                     |     |                                                                                                                                                                                                                                                                                                                                                                                |                    |
| 41 |                                                                     |     |                                                                                                                                                                                                                                                                                                                                                                                |                    |
| 42 |                                                                     |     |                                                                                                                                                                                                                                                                                                                                                                                |                    |
| 43 | Allocation concealment mechanism                                    | 16b | Mechanism of implementing the allocation sequence (eg, central telephone; sequentially numbered, opaque, sealed envelopes), describing any steps to conceal the sequence until interventions are assigned                                                                                                                                                                      | 36-37              |
| 44 |                                                                     |     |                                                                                                                                                                                                                                                                                                                                                                                |                    |
| 45 |                                                                     |     |                                                                                                                                                                                                                                                                                                                                                                                |                    |
| 46 |                                                                     |     |                                                                                                                                                                                                                                                                                                                                                                                |                    |
| 47 | Implementation                                                      | 16c | Who will generate the allocation sequence, who will enrol participants, and who will assign participants to interventions                                                                                                                                                                                                                                                      | 36-38              |
| 48 |                                                                     |     |                                                                                                                                                                                                                                                                                                                                                                                |                    |
| 49 |                                                                     |     |                                                                                                                                                                                                                                                                                                                                                                                |                    |
| 50 |                                                                     |     |                                                                                                                                                                                                                                                                                                                                                                                |                    |
| 51 |                                                                     |     |                                                                                                                                                                                                                                                                                                                                                                                |                    |
| 52 |                                                                     |     |                                                                                                                                                                                                                                                                                                                                                                                |                    |
| 53 | Blinding (masking)                                                  | 17a | Who will be blinded after assignment to interventions (eg, trial participants, care providers, outcome assessors, data analysts), and how                                                                                                                                                                                                                                      | 37                 |
| 54 |                                                                     |     |                                                                                                                                                                                                                                                                                                                                                                                |                    |
| 55 |                                                                     |     |                                                                                                                                                                                                                                                                                                                                                                                |                    |
| 56 |                                                                     |     |                                                                                                                                                                                                                                                                                                                                                                                |                    |
| 57 |                                                                     | 17b | If blinded, circumstances under which unblinding is permissible, and procedure for revealing a participant's allocated intervention during the trial                                                                                                                                                                                                                           | N/A                |
| 58 |                                                                     |     |                                                                                                                                                                                                                                                                                                                                                                                |                    |
| 59 |                                                                     |     |                                                                                                                                                                                                                                                                                                                                                                                |                    |
| 60 | <b>Methods: Data collection, management, and analysis</b>           |     |                                                                                                                                                                                                                                                                                                                                                                                |                    |

|    |                                 |     |                                                                                                                                                                                                                                                                                                                                                                                                              |              |
|----|---------------------------------|-----|--------------------------------------------------------------------------------------------------------------------------------------------------------------------------------------------------------------------------------------------------------------------------------------------------------------------------------------------------------------------------------------------------------------|--------------|
| 1  |                                 |     |                                                                                                                                                                                                                                                                                                                                                                                                              |              |
| 2  | Data collection methods         | 18a | Plans for assessment and collection of outcome, baseline, and other trial data, including any related processes to promote data quality (eg, duplicate measurements, training of assessors) and a description of study instruments (eg, questionnaires, laboratory tests) along with their reliability and validity, if known. Reference to where data collection forms can be found, if not in the protocol | 13-14, 26-35 |
| 3  |                                 |     |                                                                                                                                                                                                                                                                                                                                                                                                              |              |
| 4  |                                 |     |                                                                                                                                                                                                                                                                                                                                                                                                              |              |
| 5  |                                 |     |                                                                                                                                                                                                                                                                                                                                                                                                              |              |
| 6  |                                 |     |                                                                                                                                                                                                                                                                                                                                                                                                              |              |
| 7  |                                 |     |                                                                                                                                                                                                                                                                                                                                                                                                              |              |
| 8  |                                 |     |                                                                                                                                                                                                                                                                                                                                                                                                              |              |
| 9  |                                 | 18b | Plans to promote participant retention and complete follow-up, including list of any outcome data to be collected for participants who discontinue or deviate from intervention protocols                                                                                                                                                                                                                    | 13-26        |
| 10 |                                 |     |                                                                                                                                                                                                                                                                                                                                                                                                              |              |
| 11 | Data management                 | 19  | Plans for data entry, coding, security, and storage, including any related processes to promote data quality (eg, double data entry; range checks for data values). Reference to where details of data management procedures can be found, if not in the protocol                                                                                                                                            | 38-39        |
| 12 |                                 |     |                                                                                                                                                                                                                                                                                                                                                                                                              |              |
| 13 |                                 |     |                                                                                                                                                                                                                                                                                                                                                                                                              |              |
| 14 |                                 |     |                                                                                                                                                                                                                                                                                                                                                                                                              |              |
| 15 | Statistical methods             | 20a | Statistical methods for analysing primary and secondary outcomes. Reference to where other details of the statistical analysis plan can be found, if not in the protocol                                                                                                                                                                                                                                     | 37-38        |
| 16 |                                 |     |                                                                                                                                                                                                                                                                                                                                                                                                              |              |
| 17 |                                 | 20b | Methods for any additional analyses (eg, subgroup and adjusted analyses)                                                                                                                                                                                                                                                                                                                                     | 37-38        |
| 18 |                                 |     |                                                                                                                                                                                                                                                                                                                                                                                                              |              |
| 19 |                                 | 20c | Definition of analysis population relating to protocol non-adherence (eg, as randomised analysis), and any statistical methods to handle missing data (eg, multiple imputation)                                                                                                                                                                                                                              | 38           |
| 20 |                                 |     |                                                                                                                                                                                                                                                                                                                                                                                                              |              |
| 21 |                                 |     |                                                                                                                                                                                                                                                                                                                                                                                                              |              |
| 22 |                                 |     |                                                                                                                                                                                                                                                                                                                                                                                                              |              |
| 23 |                                 |     |                                                                                                                                                                                                                                                                                                                                                                                                              |              |
| 24 |                                 |     |                                                                                                                                                                                                                                                                                                                                                                                                              |              |
| 25 |                                 |     |                                                                                                                                                                                                                                                                                                                                                                                                              |              |
| 26 | <b>Methods: Monitoring</b>      |     |                                                                                                                                                                                                                                                                                                                                                                                                              |              |
| 27 |                                 |     |                                                                                                                                                                                                                                                                                                                                                                                                              |              |
| 28 | Data monitoring                 | 21a | Composition of data monitoring committee (DMC); summary of its role and reporting structure; statement of whether it is independent from the sponsor and competing interests; and reference to where further details about its charter can be found, if not in the protocol. Alternatively, an explanation of why a DMC is not needed                                                                        | N/A          |
| 29 |                                 |     |                                                                                                                                                                                                                                                                                                                                                                                                              |              |
| 30 |                                 | 21b | Description of any interim analyses and stopping guidelines, including who will have access to these interim results and make the final decision to terminate the trial                                                                                                                                                                                                                                      | N/A          |
| 31 |                                 |     |                                                                                                                                                                                                                                                                                                                                                                                                              |              |
| 32 |                                 |     |                                                                                                                                                                                                                                                                                                                                                                                                              |              |
| 33 |                                 |     |                                                                                                                                                                                                                                                                                                                                                                                                              |              |
| 34 |                                 |     |                                                                                                                                                                                                                                                                                                                                                                                                              |              |
| 35 |                                 |     |                                                                                                                                                                                                                                                                                                                                                                                                              |              |
| 36 | Harms                           | 22  | Plans for collecting, assessing, reporting, and managing solicited and spontaneously reported adverse events and other unintended effects of trial interventions or trial conduct                                                                                                                                                                                                                            | N/A          |
| 37 |                                 |     |                                                                                                                                                                                                                                                                                                                                                                                                              |              |
| 38 |                                 |     |                                                                                                                                                                                                                                                                                                                                                                                                              |              |
| 39 |                                 |     |                                                                                                                                                                                                                                                                                                                                                                                                              |              |
| 40 | Auditing                        | 23  | Frequency and procedures for auditing trial conduct, if any, and whether the process will be independent from investigators and the sponsor                                                                                                                                                                                                                                                                  | N/A          |
| 41 |                                 |     |                                                                                                                                                                                                                                                                                                                                                                                                              |              |
| 42 |                                 |     |                                                                                                                                                                                                                                                                                                                                                                                                              |              |
| 43 | <b>Ethics and dissemination</b> |     |                                                                                                                                                                                                                                                                                                                                                                                                              |              |
| 44 |                                 |     |                                                                                                                                                                                                                                                                                                                                                                                                              |              |
| 45 | Research ethics approval        | 24  | Plans for seeking research ethics committee/institutional review board (REC/IRB) approval                                                                                                                                                                                                                                                                                                                    | 5, 11        |
| 46 |                                 |     |                                                                                                                                                                                                                                                                                                                                                                                                              |              |
| 47 | Protocol amendments             | 25  | Plans for communicating important protocol modifications (eg, changes to eligibility criteria, outcomes, analyses) to relevant parties (eg, investigators, REC/IRBs, trial participants, trial registries, journals, regulators)                                                                                                                                                                             | N/A          |
| 48 |                                 |     |                                                                                                                                                                                                                                                                                                                                                                                                              |              |
| 49 |                                 |     |                                                                                                                                                                                                                                                                                                                                                                                                              |              |
| 50 |                                 |     |                                                                                                                                                                                                                                                                                                                                                                                                              |              |
| 51 |                                 |     |                                                                                                                                                                                                                                                                                                                                                                                                              |              |
| 52 | Consent or assent               | 26a | Who will obtain informed consent or assent from potential trial participants or authorised surrogates, and how (see Item 32)                                                                                                                                                                                                                                                                                 | 11-13        |
| 53 |                                 |     |                                                                                                                                                                                                                                                                                                                                                                                                              |              |
| 54 |                                 | 26b | Additional consent provisions for collection and use of participant data and biological specimens in ancillary studies, if applicable                                                                                                                                                                                                                                                                        | N/A          |
| 55 |                                 |     |                                                                                                                                                                                                                                                                                                                                                                                                              |              |
| 56 |                                 |     |                                                                                                                                                                                                                                                                                                                                                                                                              |              |
| 57 |                                 |     |                                                                                                                                                                                                                                                                                                                                                                                                              |              |
| 58 | Confidentiality                 | 27  | How personal information about potential and enrolled participants will be collected, shared, and maintained in order to protect confidentiality before, during, and after the trial                                                                                                                                                                                                                         | 38-39        |
| 59 |                                 |     |                                                                                                                                                                                                                                                                                                                                                                                                              |              |
| 60 |                                 |     |                                                                                                                                                                                                                                                                                                                                                                                                              |              |



|    |                               |     |                                                                                                                                                                                                                                                                                     |       |
|----|-------------------------------|-----|-------------------------------------------------------------------------------------------------------------------------------------------------------------------------------------------------------------------------------------------------------------------------------------|-------|
| 1  |                               |     |                                                                                                                                                                                                                                                                                     |       |
| 2  | Declaration of interests      | 28  | Financial and other competing interests for principal investigators for the overall trial and each study site                                                                                                                                                                       | 45    |
| 3  |                               |     |                                                                                                                                                                                                                                                                                     |       |
| 4  |                               |     |                                                                                                                                                                                                                                                                                     |       |
| 5  | Access to data                | 29  | Statement of who will have access to the final trial dataset, and disclosure of contractual agreements that limit such access for investigators                                                                                                                                     | 44-45 |
| 6  |                               |     |                                                                                                                                                                                                                                                                                     |       |
| 7  |                               |     |                                                                                                                                                                                                                                                                                     |       |
| 8  |                               |     |                                                                                                                                                                                                                                                                                     |       |
| 9  | Ancillary and post-trial care | 30  | Provisions, if any, for ancillary and post-trial care, and for compensation to those who suffer harm from trial participation                                                                                                                                                       | N/A   |
| 10 |                               |     |                                                                                                                                                                                                                                                                                     |       |
| 11 | Dissemination policy          | 31a | Plans for investigators and sponsor to communicate trial results to participants, healthcare professionals, the public, and other relevant groups (eg, via publication, reporting in results databases, or other data sharing arrangements), including any publication restrictions | 43    |
| 12 |                               |     |                                                                                                                                                                                                                                                                                     |       |
| 13 |                               |     |                                                                                                                                                                                                                                                                                     |       |
| 14 |                               |     |                                                                                                                                                                                                                                                                                     |       |
| 15 |                               |     |                                                                                                                                                                                                                                                                                     |       |
| 16 |                               | 31b | Authorship eligibility guidelines and any intended use of professional writers                                                                                                                                                                                                      | 44    |
| 17 |                               |     |                                                                                                                                                                                                                                                                                     |       |
| 18 |                               | 31c | Plans, if any, for granting public access to the full protocol, participant-level dataset, and statistical code                                                                                                                                                                     | N/A   |
| 19 |                               |     |                                                                                                                                                                                                                                                                                     |       |
| 20 |                               |     |                                                                                                                                                                                                                                                                                     |       |
| 21 |                               |     |                                                                                                                                                                                                                                                                                     |       |
| 22 | <b>Appendices</b>             |     |                                                                                                                                                                                                                                                                                     |       |
| 23 |                               |     |                                                                                                                                                                                                                                                                                     |       |
| 24 | Informed consent materials    | 32  | Model consent form and other related documentation given to participants and authorised surrogates                                                                                                                                                                                  | N/A   |
| 25 |                               |     |                                                                                                                                                                                                                                                                                     |       |
| 26 |                               |     |                                                                                                                                                                                                                                                                                     |       |
| 27 | Biological specimens          | 33  | Plans for collection, laboratory evaluation, and storage of biological specimens for genetic or molecular analysis in the current trial and for future use in ancillary studies, if applicable                                                                                      | N/A   |
| 28 |                               |     |                                                                                                                                                                                                                                                                                     |       |
| 29 |                               |     |                                                                                                                                                                                                                                                                                     |       |

---

\*It is strongly recommended that this checklist be read in conjunction with the SPIRIT 2013 Explanation & Elaboration for important clarification on the items. Amendments to the protocol should be tracked and dated. The SPIRIT checklist is copyrighted by the SPIRIT Group under the Creative Commons "[Attribution-NonCommercial-NoDerivs 3.0 Unported](https://creativecommons.org/licenses/by-nc-nd/3.0/)" license.
